# Supplementary material for: Association of maternal depression and anxiety with toddler social-emotional and cognitive development in South Africa: a prospective cohort study
Source: PubMed Central journal article supplement (PMC9014070; doi:10.1136/bmjopen-2021-058135), 2022-04-13
Supplement: bmjopen-2021-058135.draft_revisions.pdf [file bmjopen-2021-058135.draft_revisions.pdf]

# BMJ Open

BMJ Open is committed to open peer review. As part of this commitment we make the peer review history of every article we publish publicly available.

When an article is published we post the peer reviewers' comments and the authors' responses online. We also post the versions of the paper that were used during peer review. These are the versions that the peer review comments apply to.

The versions of the paper that follow are the versions that were submitted during the peer review process. They are not the versions of record or the final published versions. They should not be cited or distributed as the published version of this manuscript.

BMJ Open is an open access journal and the full, final, typeset and author-corrected version of record of the manuscript is available on our site with no access controls, subscription charges or pay-per-view fees (<http://bmjopen.bmj.com>).

If you have any questions on BMJ Open's open peer review process please email [info.bmjopen@bmj.com](mailto:info.bmjopen@bmj.com)

# BMJ Open

## Association of Maternal Depression and Anxiety with Toddler Social-Emotional and Cognitive Development in South Africa: A prospective cohort study

|                               |                                                                                                                                                                                                                                                                                                                                                                                                                                                                                                                                                                                                                                                                                                                                                                                                                                                                                                                                                                                                                                                                                                                                                                                                                                            |
|-------------------------------|--------------------------------------------------------------------------------------------------------------------------------------------------------------------------------------------------------------------------------------------------------------------------------------------------------------------------------------------------------------------------------------------------------------------------------------------------------------------------------------------------------------------------------------------------------------------------------------------------------------------------------------------------------------------------------------------------------------------------------------------------------------------------------------------------------------------------------------------------------------------------------------------------------------------------------------------------------------------------------------------------------------------------------------------------------------------------------------------------------------------------------------------------------------------------------------------------------------------------------------------|
| Journal:                      | <i>BMJ Open</i>                                                                                                                                                                                                                                                                                                                                                                                                                                                                                                                                                                                                                                                                                                                                                                                                                                                                                                                                                                                                                                                                                                                                                                                                                            |
| Manuscript ID                 | bmjopen-2021-058135                                                                                                                                                                                                                                                                                                                                                                                                                                                                                                                                                                                                                                                                                                                                                                                                                                                                                                                                                                                                                                                                                                                                                                                                                        |
| Article Type:                 | Original research                                                                                                                                                                                                                                                                                                                                                                                                                                                                                                                                                                                                                                                                                                                                                                                                                                                                                                                                                                                                                                                                                                                                                                                                                          |
| Date Submitted by the Author: | 07-Oct-2021                                                                                                                                                                                                                                                                                                                                                                                                                                                                                                                                                                                                                                                                                                                                                                                                                                                                                                                                                                                                                                                                                                                                                                                                                                |
| Complete List of Authors:     | Shuffrey, Lauren; Columbia University Irving Medical Center, Psychiatry; New York State Psychiatric Institute, Division of Developmental Neuroscience<br>Sania, Ayesha; Columbia University Irving Medical Center, Psychiatry; New York State Psychiatric Institute, Division of Developmental Neuroscience<br>Brito, Natalie; New York University, Department of Applied Psychology<br>Potter, Mandy; Stellenbosch University Faculty of Medicine and Health Sciences, Obstetrics and Gynaecology<br>Springer, Priscilla; Stellenbosch University, Paediatrics and Child Health<br>Lucchini, Maristella ; Columbia University Irving Medical Center, Psychiatry; New York State Psychiatric Institute, Neuroscience<br>Rayport, Yael; Columbia University Irving Medical Center, Department of Psychiatry; New York State Psychiatric Institute, Neuroscience<br>Du Plessis, Carlie; Stellenbosch University Faculty of Medicine and Health Sciences, Department of Obstetrics and Gynaecology<br>Odendaal, H. J.; Stellenbosch University Faculty of Medicine and Health Sciences, Obstetrics & Gynaecology<br>Fifer, William; Columbia University Irving Medical Center, Psychiatry; New York State Psychiatric Institute, Neuroscience |
| Keywords:                     | Community child health < PAEDIATRICS, Depression & mood disorders < PSYCHIATRY, Anxiety disorders < PSYCHIATRY, Child & adolescent psychiatry < PSYCHIATRY                                                                                                                                                                                                                                                                                                                                                                                                                                                                                                                                                                                                                                                                                                                                                                                                                                                                                                                                                                                                                                                                                 |
|                               |                                                                                                                                                                                                                                                                                                                                                                                                                                                                                                                                                                                                                                                                                                                                                                                                                                                                                                                                                                                                                                                                                                                                                                                                                                            |

SCHOLARONE™  
Manuscripts

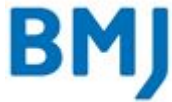

I, the Submitting Author has the right to grant and does grant on behalf of all authors of the Work (as defined in the below author licence), an exclusive licence and/or a non-exclusive licence for contributions from authors who are: i) UK Crown employees; ii) where BMJ has agreed a CC-BY licence shall apply, and/or iii) in accordance with the terms applicable for US Federal Government officers or employees acting as part of their official duties; on a worldwide, perpetual, irrevocable, royalty-free basis to BMJ Publishing Group Ltd ("BMJ") its licensees and where the relevant Journal is co-owned by BMJ to the co-owners of the Journal, to publish the Work in this journal and any other BMJ products and to exploit all rights, as set out in our [licence](#).

The Submitting Author accepts and understands that any supply made under these terms is made by BMJ to the Submitting Author unless you are acting as an employee on behalf of your employer or a postgraduate student of an affiliated institution which is paying any applicable article publishing charge ("APC") for Open Access articles. Where the Submitting Author wishes to make the Work available on an Open Access basis (and intends to pay the relevant APC), the terms of reuse of such Open Access shall be governed by a Creative Commons licence – details of these licences and which [Creative Commons](#) licence will apply to this Work are set out in our licence referred to above.

Other than as permitted in any relevant BMJ Author's Self Archiving Policies, I confirm this Work has not been accepted for publication elsewhere, is not being considered for publication elsewhere and does not duplicate material already published. I confirm all authors consent to publication of this Work and authorise the granting of this licence.

**Title:** Association of Maternal Depression and Anxiety with Toddler Social-Emotional and Cognitive Development in South Africa: A prospective cohort study

**Lauren C. Shuffrey**\*<sup>1,2</sup>, **Ayesha Sania**\*<sup>1,2</sup>, Natalie H. Brito<sup>3</sup>, Mandy Potter<sup>4</sup>, Priscilla E. Springer<sup>5</sup>, Maristella Lucchini<sup>1,2</sup>, Yael Rayport<sup>1,2</sup>, Carlie Du Plessis<sup>4</sup>, Hein J. Odendaal<sup>4</sup>, William P. Fifer<sup>1,2,6</sup>

<sup>1</sup> Department of Psychiatry, Columbia University Irving Medical Center, New York, NY 10032 USA

<sup>2</sup> Division of Developmental Neuroscience, New York State Psychiatric Institute, New York, NY 10032 USA

<sup>3</sup> Department of Applied Psychology, New York University, New York, NY, 10003 USA

<sup>4</sup> Department of Obstetrics and Gynaecology, Faculty of Medicine and Health Science, Stellenbosch University, Cape Town, Western Cape, South Africa 7530

<sup>5</sup> Department of Paediatrics and Child Health, Stellenbosch University, Cape Town, Western Cape, South Africa 7530

<sup>6</sup> Department of Pediatrics, Columbia University Irving Medical Center, New York, NY 10032 USA

\* denotes shared authorship

**Corresponding Author:**

Lauren C. Shuffrey, PhD  
Columbia University Medical Center  
New York State Psychiatric Institute  
1051 Riverside Drive, Unit 40  
New York, New York 10032  
lsg2129@cumc.columbia.edu

**Financial Support:** This research was supported by the Bill and Melinda Gates Foundation (WPF) and grants U01HD055154, U01HD045935, U01HD055155, and U01HD045991 issued by the *Eunice Kennedy Shriver* National Institute of Child Health and Human Development (NICHD) and grant U01AA016501 issued by the National Institute on Alcohol Abuse and Alcoholism (NIAAA). Dr. Lauren Shuffrey is supported by K99HD103910 issued by the Eunice Kennedy Shriver National Institute Of Child Health & Human Development. Dr. Ayesha Sania is supported by UH3OD023279-05S1, re-entry supplement from Office of the Director, NIH, and Office of Research on Women Health (ORWH). The content is solely the responsibility of the authors and does not necessarily represent the official views of the National Institutes of Health.

**Competing Interests:** The authors have no competing interests to declare.

**Data availability:** Data are available on request.

**Patient and Public Involvement:** Patients or the public were not involved in the design, or conduct, or reporting, or dissemination plans of our research

## **Abstract:**

**Objective:** A robust literature has identified associations between prenatal maternal depression and adverse child social-emotional and cognitive outcomes. The majority of prior research is from high-income countries despite increased reporting of perinatal depression in low and middle income countries (LMICs). Additionally, despite the comorbidity between depression and anxiety, few prior studies have examined their joint impact on child neurodevelopment. The objective of the current analysis was to examine associations between prenatal maternal depression and anxiety with child social-emotional and cognitive development in a cohort from the Western Cape Province of South Africa.

**Design:** Prenatal maternal depression and anxiety were measured using the Edinburgh Postnatal Depression Scale (EPDS) and the State-Trait Anxiety Scale (STAI) at 20 – 24 weeks' gestation. Child neurobehavior was assessed at age 3 using the Brief Infant Toddler Social Emotional Assessment (BITSEA) and the Bayley Scales of Infant Development (BSID-III). We used linear regression models to examine the independent and joint association between prenatal maternal depression, anxiety, and child developmental outcomes.

**Results:** Participants consisted of 600 maternal-infant dyads (274 females; gestational age at birth: 38.89 weeks  $\pm$  2.03). Children born to mothers with both prenatal depression and trait anxiety had the largest increase in social-emotional problems (mean difference: 4.66; 95% CI 3.43, 5.90) compared to children born to mothers with no prenatal depression or trait anxiety, each condition alone, or compared to mothers with depression and state anxiety. Additionally, children born to mothers with prenatal maternal depression and trait anxiety had the greatest reduction in mean cognitive scores on the BSID-III (mean difference: -1.04; 95% CI -1.99, -0.08).

**Conclusions:** The observed association between comorbid prenatal maternal depression and chronic anxiety with subsequent child social-emotional and cognitive development underscores the need for targeting mental health support in perinatal women in LMICs to improve long-term child neurobehavioral outcomes.

## **Strengths and limitations of this study**

- Strengths include prospective evaluation of maternal depression and anxiety symptoms during pregnancy and prospective assessment of cognitive and social-emotional outcomes within the same cohort in a large sample of mother-children pairs.
- Limitations include a lack of data on maternal mental health assessments postnatally and mother-child dyadic measures, which are potential mediators of the relationship between prenatal maternal depression, prenatal maternal anxiety, and child developmental outcomes.

1  
2  
3 **Key Questions:**  
4

5 What is already known about this subject?  
6

- 7 • Prenatal maternal depression and anxiety are associated with adverse child social-emotional and cognitive outcomes.
- 8 • The majority of prior research in this domain is from high-income countries.
- 9 • In South Africa an estimated 35% women report prenatal depression.  
10  
11

12 What does this study add?  
13

- 14 • Our results from a South African cohort study suggest comorbid prenatal maternal depression and chronic anxiety have a greater impact on child social-emotional and cognitive development than either condition alone or than comorbid prenatal maternal depression and transitory anxiety during pregnancy.  
15  
16  
17  
18

19 How might this impact on clinical practice?  
20

- 21 • These results underscore the need for targeting mental health in perinatal women in low and middle income countries to improve long-term child neurobehavioral outcomes.  
22  
23  
24  
25  
26  
27  
28  
29  
30  
31  
32  
33  
34  
35  
36  
37  
38  
39  
40  
41  
42  
43  
44  
45  
46  
47  
48  
49  
50  
51

52 **Keywords:** prenatal depression, prenatal anxiety; social-emotional development; cognitive  
53 development  
54  
55  
56  
57  
58  
59  
60

## Introduction

Decades of research on the early origins of behavior has promoted the concept that the prenatal environment has a profound impact on one's risk for the development of neurodevelopmental or psychiatric disorders<sup>1 2</sup>. Several prior studies have identified associations between prenatal maternal depression and increased risk for social-emotional problems and decrements in cognitive development. However, the majority of prior research in this domain is from high-income countries (HICs), despite increased reporting of perinatal depression in low and middle income countries (LMICs) including South Africa where an estimated 35% women report prenatal depression<sup>3 4</sup>. Additionally, despite the comorbidity between depression and anxiety, few prior studies have examined their joint impact on child neurodevelopment.

Several studies in HICs have identified associations between prenatal maternal depression, anxiety, and offspring behavioral, social-emotional, and cognitive development<sup>5</sup>. Specifically, a meta-analysis demonstrated adverse effects of prenatal maternal depression and anxiety on child social-emotional problems, with odds ratios of 1.79 and 1.50 respectively<sup>6</sup>. Prenatal maternal depression and anxiety are also associated with cognitive and language deficits<sup>7 8</sup>, delayed motor development<sup>8</sup>, emotional and behavior dysregulation<sup>9-11</sup>, inattention and hyperactivity<sup>12-14</sup>, and difficult temperament<sup>15</sup>. A more recent meta-analysis not only confirmed prior reports, but also found that the effects of perinatal maternal depression extend beyond infancy through adolescence<sup>16</sup>.

The developmental origins of health and disease (DOHaD) model posits that maternal psychological distress during pregnancy (e.g. perceived stress, depression, anxiety, trauma) may result in changes in hypothalamic pituitary adrenal (HPA) axis function and upregulation of inflammatory processes with downstream effects on offspring perinatal brain development and

1  
2  
3 behavior<sup>17</sup>. These risk factors may be exacerbated in LMICs such as South Africa, where both  
4  
5 poverty and perinatal mental health disorders are highly prevalent<sup>18 19</sup>. Specifically, in South  
6  
7 Africa maternal mood disorders have been linked to structural and community stressors  
8  
9 associated with markers of poverty including less than a high school education, lack of social  
10  
11 support, alcohol use, family stress, food insecurity, lack of partner involvement, and intimate  
12  
13 partner violence<sup>20-24</sup>. There are few prior studies that have examined the impact of prenatal  
14  
15 maternal mental health on offspring social-emotional or cognitive development in South Africa.  
16  
17 While the few prior studies reported significant harmful effects of prenatal maternal stress or  
18  
19 perinatal maternal depression, there is still a significant gap in the literature in research  
20  
21 examining the impact of prenatal maternal psychological health on child neurobehavioral  
22  
23 development in resource-poor communities<sup>20 25 26</sup>. Additionally, to our knowledge no prior South  
24  
25 African studies have examined the joint effect of prenatal maternal depression and anxiety on  
26  
27 child neurobehavioral outcomes. Research examining the long-term impact of prenatal maternal  
28  
29 depression and anxiety on child behavioral and cognitive outcomes is critical for providing  
30  
31 justification to local public health services for targeting mental health support in perinatal  
32  
33 women from underserved communities.  
34  
35  
36  
37  
38  
39

40 The objective of the current analysis was to determine if prenatal maternal depression and  
41  
42 state or trait anxiety were associated with child social-emotional problems or cognitive  
43  
44 development at approximately three years of age in a South African cohort from the Western  
45  
46 Cape.  
47  
48  
49  
50  
51  
52  
53  
54  
55  
56  
57  
58  
59  
60



## Materials and Methods

*Participants.* Participants were a subset of infants with available outcome data at age 3 enrolled in the Safe Passage Study conducted by the Prenatal Alcohol and SIDS and Stillbirth (PASS) Network, a multi-center study investigating the role of prenatal exposure in risk for sudden infant death syndrome (SIDS), stillbirth, and fetal alcohol spectrum disorders. Eligibility criteria for the Safe Passage study included the ability to provide informed consent in English or Afrikaans, 16 years of age or older at the time of consent, and a gestational age between 6 weeks and 40 weeks at the time of consent based on estimated delivery date<sup>27</sup>. Informed consent was obtained for the Safe Passage study and from a parent or legal guardian of each participant for developmental follow-up assessments. Ethical approval was obtained for both time points from the Health Research Ethics Committee of Stellenbosch University and the New York State Psychiatric Institute.

### Maternal Assessments.

*Maternal-infant chart abstraction, demographic, and socioeconomic measures.* Maternal-infant medical charts were abstracted to obtain maternal age at delivery, gestational age at birth, mode of delivery, and the infant's biological sex. Measures to collect prenatal alcohol, tobacco, and recreational drug exposure have been previously described<sup>27 28</sup>. Through study specific case report forms, participants indicated demographic and socioeconomic information including race, maternal educational attainment, household crowding (persons per room in household), access to running water inside the house, prenatal care during pregnancy, and marital status.

*Self-reported depression and anxiety measures.* Information regarding maternal mental health during pregnancy was obtained at 20 – 24 weeks' gestation. Depressive symptoms were

1  
2  
3 measured using the Edinburgh Postnatal Depression Scale (EPDS), a depression screening tool  
4 developed to specifically assess depressive symptoms in perinatal women where higher scores  
5 indicate more severe depressive symptoms<sup>29 30</sup>. The EPDS is widely used and has been validated  
6 in English and Afrikaans in South Africa<sup>29 31</sup>. Prior studies have used a cut-off score of  $\geq 12$  or  $\geq$   
7 13 to be indicative of major depression within perinatal women living in South Africa<sup>29 31</sup>.  
8  
9  
10  
11  
12  
13  
14 Maternal anxiety symptoms were measured using the State-Trait Anxiety Inventory (STAI)<sup>32</sup>, an  
15 anxiety screening tool to distinguish anxiety symptoms from depressive symptoms which has  
16 also been validated in both languages<sup>33</sup>. The STAI has two subscales, state anxiety which reflects  
17 the participant's current state of anxiety when completing the questionnaires and trait anxiety,  
18 which is thought to be consistent across time and reflect personality traits. In HICs, the STAI has  
19 a cut-off score of  $\geq 40$  on both the state anxiety and trait anxiety subscales to indicate a threshold  
20 for clinical levels of anxiety. Based on these prior studies, we used a cutoff of  $\geq 13$  to indicate  
21 maternal depression, a cutoff of  $> 40$  on the STAI-state subscale to indicate state anxiety, and a  
22 cutoff of  $> 40$  on the STAI-trait subscale to indicate trait anxiety.  
23  
24  
25  
26  
27  
28  
29  
30  
31  
32  
33  
34  
35  
36  
37

#### 38 Toddler Developmental Assessments.

39  
40 *Bayley Scales of Infant Development III Screening Test.* The Bayley Scales of Infant  
41 Development III (BSID-III screening test) were designed as a rapid assessment of cognitive,  
42 language, and motor functioning in infants and young children in order to determine if a child's  
43 development is within normal limits and identify risk for developmental delay. The BSID-III  
44 screening test has high test-retest reliability: Cognitive (0.85), Receptive Language (0.88),  
45 Expressive Language (0.88), Fine Motor (0.82), and Gross Motor (0.86)<sup>34</sup>. Although the BSID-  
46 III screening test does not identify degree of impairment, the cut-off points indicate whether a  
47  
48  
49  
50  
51  
52  
53  
54  
55  
56  
57  
58  
59  
60

1  
2  
3 child shows competence in age-appropriate tasks, evidence of emerging age-appropriate skills,  
4 and evidence of being at risk for developmental delay. The BSID has been validated and widely  
5 used throughout South Africa<sup>35 36</sup>.  
6  
7

8  
9  
10 *Brief Infant Toddler Social Emotional Assessment (BITSEA)*. The Brief Infant-Toddler  
11 Social and Emotional Assessment (BITSEA) is a 42-item parental report measure of social-  
12 emotional development, behavioral problems, and delays in competence<sup>37</sup>. Domains assessed  
13 within the BITSEA include: externalizing (activity/impulsivity, aggression/defiance, peer  
14 aggression), internalizing (depression/withdrawal, anxiety, separation distress, inhibition to  
15 novelty), dysregulation (sleep, negative emotionality, eating, sensory sensitivity), and  
16 competence (compliance, attention, imitation/play, mastery motivation, empathy, and pro-social  
17 peer relations)<sup>37</sup>. Findings from the BITSEA validation study provide preliminary support for the  
18 BITSEA as a reliable and valid brief screener for infant-toddler social-emotional and behavioral  
19 problems in addition to delays in competence<sup>38</sup>. When used in socioeconomically and ethnically  
20 diverse community-based populations, the BITSEA demonstrated excellent test-retest reliability  
21 and good inter-rater agreement between parents<sup>37</sup>.  
22  
23  
24  
25  
26  
27  
28  
29  
30  
31  
32  
33  
34  
35  
36  
37  
38  
39

40 Statistical Analyses. Using multiple linear regression models, we estimated independent and  
41 joint effects of maternal depression and state and trait anxiety on social-emotional problem,  
42 social emotional competence, and cognitive development scores. Two, separate four-level  
43 categorical prenatal maternal mental health variables were created to assess the impact of  
44 prenatal maternal depression, trait anxiety, and state anxiety. We created a prenatal maternal  
45 depression and trait anxiety variable with four categories: (1) *No Prenatal Depression or Trait*  
46 *Anxiety* (n=199; 33.17%, Reference Category), (2) *Prenatal Depression Only* (106; 17.67%), (3)  
47  
48  
49  
50  
51  
52  
53  
54  
55  
56  
57  
58  
59  
60

1  
2  
3 *Prenatal Trait Anxiety Only* (n=68; 11.33%) and (4) *Prenatal Maternal Depression and Trait*  
4 *Anxiety* (n=227; 37.83%) (Table 1). In separate models we additionally examined the  
5  
6 independent and joint effects of prenatal maternal depression and state anxiety. We created a  
7  
8 prenatal maternal depression and state anxiety variable with four categories: (1) *No Prenatal*  
9  
10 *Depression or State Anxiety* (n=248; 41.33%; Reference Category), (2) *Prenatal Depression*  
11  
12 *Only* (n=237; 39.50%), (3) *Prenatal State Anxiety Only* (n=19; 3.17%) and (4) *Prenatal*  
13  
14 *Maternal Depression and State Anxiety* (n=96; 16%) (Table 1). For each regression model, either  
15  
16 *No Prenatal Maternal Depression or Trait Anxiety* or *No Prenatal Maternal Depression and*  
17  
18 *State Anxiety* was set as the reference category. Minimally adjusted models included sex,  
19  
20 gestational age at birth, and age at follow up as covariates. Fully adjusted models additionally  
21  
22 controlled for prenatal maternal alcohol use, prenatal maternal tobacco use, maternal  
23  
24 employment status at delivery, maternal educational attainment at delivery, parity, and the  
25  
26 household crowding index. We used missing indicator methods and median imputation to  
27  
28 account for missing categorical and continuous covariate data, respectively (described in Table 1).  
29  
30 All analyses were performed in SAS software version 9.4 (SAS Institute, Cary NC).  
31  
32  
33  
34  
35  
36  
37  
38  
39  
40  
41  
42  
43  
44  
45  
46  
47  
48  
49  
50  
51  
52  
53  
54  
55  
56  
57  
58  
59  
60

## Results

*Maternal and Child Demographic Characteristics.* The participants included in the present analysis consisted of mothers and their infant born between April 2014 and August 2015 from the Western Cape Province of South Africa who participated in a follow-up study to examine social-emotional development and cognitive development at approximately three years of age. A total of n=18 mother-infant dyads were excluded due to missing maternal prenatal mental health data. The final sample consisted of 600 maternal-infant dyads (274 females; gestational age at birth: 38.89 weeks  $\pm$  2.03) (Table 1).

*Child Social-Emotional Development.* Based on the BITSEA problem scale percentile rank score of 26 or higher, 50% of children (310/614) were classified as having a “possible problem”. Based on the BITSEA competence scale percentile rank score of 15 or lower, 5% (34/614) of children were classified in the “possible deficit/delay range” (Table 2). There were no significant sex differences in social-emotional problems on the BITSEA, however girls had significantly higher social-emotional competence compared to boys (mean difference: 0.38, CI: 0.05, 0.71,  $p = 0.03$ )

*Association between Prenatal Maternal Depression, Trait Anxiety, and Child Social-Emotional Development.* Compared to children born to mothers with no prenatal depression or trait anxiety, children born to mothers with prenatal depression and trait anxiety had the greatest increase in social-emotional problems (mean difference: 4.66; 95% CI 3.43, 5.90), followed by prenatal maternal trait anxiety only (mean difference: 3.87; 95% CI 2.07, 5.66), and finally prenatal maternal depression only (mean difference: 2.76; 95% CI 1.23, 4.29) in minimally adjusted models. These associations remained significant in fully adjusted models where similarly the greatest increase in social-emotional problems was in the comorbid prenatal

1  
2  
3 maternal depression and trait anxiety group (mean difference: 4.33; 95% CI 2.90, 5.67), followed  
4  
5 by prenatal maternal trait anxiety only (mean difference: 3.23; 95% CI 1.19, 5.27), with the  
6  
7 smallest mean difference for prenatal maternal depression only group (mean difference: 2.64;  
8  
9 95% CI 1.02, 4.27) as compared to the no prenatal depression or trait anxiety group (Figure 1).  
10  
11 Additional significant predictors in the multivariate models were parity of 3 or greater which was  
12  
13 associated with a reduction in social-emotional problems (mean difference: -3.02, 95% CI -4.63,  
14  
15 -1.40) and low continuous smoking during pregnancy which was associated with an increase in  
16  
17 social-emotional problems (mean difference: 1.39, 95% CI 0.039, 2.74). There were no  
18  
19 significant associations between prenatal maternal depression, trait anxiety, and child social-  
20  
21 emotional competence.  
22  
23  
24  
25

26 *Association between Prenatal Maternal Depression, State Anxiety, and Child Social-*  
27 *Emotional Development.* Compared to children born to mothers with no prenatal depression or  
28  
29 state anxiety, children born to mothers with comorbid prenatal depression and state anxiety had  
30  
31 the greatest increase in social-emotional problems (mean difference: 4.29; 95% CI 2.73, 5.84).  
32  
33 Children born to mothers with prenatal depression only also had increased social-emotional  
34  
35 problems compared to mothers with no prenatal depression or state anxiety (mean difference:  
36  
37 2.71; 95% CI 1.51, 3.88). These associations remained significant in fully adjusted models  
38  
39 (prenatal depression and state anxiety: 3.90 mean increase (95% CI 2.19, 5.60); prenatal  
40  
41 depression only: 2.58 mean increase (95% CI 1.34, 3.82)) (Figure 1). Additional significant  
42  
43 predictors in the multivariate models were parity of 3 or greater which was associated with a  
44  
45 mean reduction in social-emotional problems (mean difference: -3.22, 95% CI -4.86, -1.58), low  
46  
47 continuous smoking during pregnancy which was associated with a mean increase in social-  
48  
49 emotional problems (mean difference: 1.44; 95% CI 0.075, 2.81), and finally less than a high  
50  
51  
52  
53  
54  
55  
56  
57  
58  
59  
60

1  
2  
3 school education (some primary school only) which was associated with a mean increase in  
4 social-emotional problems (mean difference: 3.47; 95% CI 0.248, 6.70). However, there was no  
5  
6 significant mean difference in social-emotional problems on the BITSEA in children born to  
7  
8 mothers with prenatal state anxiety only. There were also no significant associations between  
9  
10 prenatal maternal depression, state anxiety, and social-emotional competence.  
11  
12  
13

14  
15 *Child Cognitive, Language, and Motor Development.* Based on normative cognitive  
16  
17 cutoff scores defined by the BSID-III, 4% of children (24/615) were classified as at-risk, 73% of  
18  
19 children were classified as emerging (448/615), and 23% of children were classified as  
20  
21 competent (143/615) (Table 2). Risk classification percentages were similar across all  
22  
23 subdomains, expressive language: 5% , receptive language: 4%, gross motor: 3%, and fine  
24  
25 motor: 3%. There were no significant sex differences in child cognitive scores.  
26  
27

28  
29 *Association between Prenatal Maternal Depression, Trait Anxiety, and Child Cognitive,*  
30  
31 *Language, and Motor Development.* Compared to children born to mothers with no prenatal  
32  
33 depression or trait anxiety, children born to mothers with comorbid prenatal depression and trait  
34  
35 anxiety had decreased mean cognitive scores on the BSID-III (mean difference: -1.04; 95% CI -  
36  
37 1.99, -0.08). Results remained significant in the fully adjusted model (mean difference; -1.11;  
38  
39 95% CI -2.13, -0.09) (Figure 2). Low continuous prenatal maternal alcohol use was also  
40  
41 associated with a mean reduction in cognitive scores (mean difference: -1.30; 95% CI -2.36, -  
42  
43 0.24).  
44  
45

46  
47 *Association between Prenatal Maternal Depression, State Anxiety, and Child Cognitive,*  
48  
49 *Language, and Motor Development.* Compared to children born to mothers with neither prenatal  
50  
51 depression nor trait anxiety, there was no significant reduction in cognitive scores for children  
52  
53  
54  
55  
56  
57  
58  
59

1  
2  
3 born to mothers with prenatal depression only, prenatal trait anxiety only, or combined prenatal  
4 depression and trait anxiety in either the minimally or fully adjusted models.  
5  
6

## 7 **Discussion**

8  
9  
10 In summary, we found the greatest increase in child social-emotional problems in  
11 children born to women with comorbid prenatal depression and trait anxiety compared to women  
12 with no prenatal depression or trait anxiety, prenatal depression alone, or prenatal trait anxiety  
13 alone. We additionally found a significant effect of comorbid prenatal maternal depression and  
14 state anxiety on increased child social-emotional problems; however, we found no effect of  
15 prenatal maternal state anxiety in the absence of prenatal maternal depression on child social-  
16 emotional problems. Finally, we reported children born to mothers with prenatal maternal  
17 depression and trait anxiety had lower cognitive scores on the BSID-III, but we did not find an  
18 association between prenatal maternal depression alone on cognitive outcomes at 3-years of age.  
19  
20  
21  
22  
23  
24  
25  
26  
27  
28  
29

30  
31 Our finding linking prenatal maternal depression and anxiety to social-emotional risk  
32 parallels two recent South African studies linking increased prenatal maternal stressors to  
33 increased behavioral problems in children with an odds ratio of 2.52, but not before 4 years of  
34 age<sup>25</sup> and increased perinatal depression to aggressive behaviors at 60 months of age<sup>20</sup>. Our  
35 findings are also largely consistent with a recent meta-analysis of studies predominately  
36 conducted in HICs, which found prenatal maternal depression and anxiety were associated with  
37 increased social-emotional problems in offspring with larger effect sizes for prenatal maternal  
38 depression (OR 1.79; 95% CI 1.61 - 1.99) compared to prenatal maternal anxiety (OR 1.50, 95%  
39 CI, 1.36 - 1.64)<sup>6</sup>. We found the greatest increase in child social-emotional problems in children  
40 born to women with comorbid prenatal depression and trait anxiety and no effect of prenatal  
41 maternal state anxiety in the absence of prenatal maternal depression on child social-emotional  
42  
43  
44  
45  
46  
47  
48  
49  
50  
51  
52  
53  
54  
55  
56  
57  
58  
59  
60



1  
2  
3 problems. Our results are suggestive that chronic anxiety measured via trait anxiety may be more  
4  
5 predictive of child neurobehavioral outcomes than a single measurement of concurrent anxiety  
6  
7 during pregnancy.  
8  
9

10 A prior meta-analysis<sup>6</sup> also found stronger effects of prenatal maternal depression and  
11  
12 anxiety on child outcomes when sociodemographic risk factors such as low-income, lower levels  
13  
14 of parental education, or single family households, were highest<sup>6</sup>. Similarly, we found that lower  
15  
16 levels of maternal education, low continuous tobacco use during pregnancy, and low continuous  
17  
18 alcohol use during pregnancy were associated with increased social-emotional problems in  
19  
20 children at three years of age. Intriguingly, maternal parity of 3 or greater was protective and  
21  
22 associated with a mean reduction in social-emotional problems which may be due to reduced  
23  
24 depression and anxiety levels in women with higher parity, changes in the perception of their  
25  
26 child's behavior due to having multiple children, or additional social opportunities during sibling  
27  
28 interactions<sup>39 40</sup>.  
29  
30  
31  
32

33 The Drakenstein Child Health Study based in the Western Cape found approximately  
34  
35 50% of the overall sample (369/731) were categorized as having cognitive delay at two years of  
36  
37 age based on cutoffs defined by United States normative data<sup>26</sup>. Better cognitive outcomes were  
38  
39 associated with higher maternal education, older child age, a primigravid mother, and higher  
40  
41 socioeconomic status whereas prenatal maternal depression was associated with a 1.03 SD (95%  
42  
43 CI -1.94 to -0.12) reduction in cognitive scores on the Bayley Scales of Infant and Toddler  
44  
45 Development at two years of age<sup>26</sup>. Similar to the Drakenstein Child Health Study<sup>26</sup>, we found  
46  
47 children born to mothers with prenatal maternal depression and trait anxiety had lower cognitive  
48  
49 scores on the BSID-III compared to the no prenatal maternal depression or trait anxiety group.  
50  
51  
52 However, in contrast we did not find an association between prenatal maternal depression alone  
53  
54  
55  
56  
57  
58  
59  
60

1  
2  
3 on cognitive outcomes at 3-years of age. More recently, a large home-visiting intervention study  
4 based in Cape Town examined the effect of prenatal maternal depression only, postnatal  
5 maternal depression only (birth – 60 months), or recurrent pre- and postnatal maternal  
6 depression only (birth – 60 months), or recurrent pre- and postnatal maternal  
7 depression. This study also accounted for several other risk factors including intimate partner  
8 violence, HIV status, and alcohol use on child social behaviors, language skills, and cognitive  
9 development. No associations were found between maternal depression at any time point with  
10 children's language or cognitive development at 36 or 60 months of age<sup>20</sup>. However, children of  
11 never depressed mothers had lower aggressive behaviors on the Child Behavior Checklist at 60  
12 months of age than children of mothers with postnatal depression only or perinatal depression<sup>20</sup>.  
13  
14  
15  
16  
17  
18  
19  
20  
21  
22  
23

24 There are several biological mechanisms which can explain prior studies and our current  
25 findings linking prenatal maternal depression and anxiety with child social-emotional behaviors  
26 and cognitive development including increased prenatal maternal inflammation and/or increased  
27 cortisol production<sup>41-50</sup>. Pregnancy is associated with increased inflammatory processes and  
28 increased placental cortisol production with reduced maternal hypothalamic–pituitary–adrenal  
29 (HPA) axis sensitivity to stress<sup>41 42</sup>. However, prenatal maternal depression may upregulate  
30 inflammatory processes and/or cortisol production. Maternal cortisol can cross the placenta  
31 resulting in increased inflammation<sup>41 42</sup> and/or affect the developmental of limbic regions, which  
32 are associated with social and emotional processes<sup>51</sup>. In animal models, increased  
33 proinflammatory proteins have been associated with widespread changes in perinatal brain  
34 development such as with volume reductions in gray and white matter, decreased density of  
35 GABAergic neurons, reduced synaptic pruning, and network dysfunction with potential  
36 downstream effects on neurobehavioral development<sup>43-50</sup>.  
37  
38  
39  
40  
41  
42  
43  
44  
45  
46  
47  
48  
49  
50  
51  
52  
53  
54  
55  
56  
57  
58  
59  
60

1  
2  
3 While we report an association of prenatal maternal depression and anxiety with child  
4 social-emotional and cognitive development from a prospective cohort study with a fairly large  
5 sample of participants, there are several limitations within the current study that are worth  
6 noting. Although, prior studies have emphasized the importance of measuring childhood trauma,  
7 maternal stress, and social support within communities with several heterogeneous risk factors<sup>3</sup>,  
8 these measures were not collected as part of the original NIH Safe Passage Study or our recent  
9 follow-up study. Therefore, we could not examine their effects or consider maternal social  
10 support as a potential moderator of resilient neurodevelopmental outcomes. There is also robust  
11 literature examining both postpartum depression (PPD) and the early mother-infant relation in  
12 shaping child outcomes. Two prior studies in South Africa demonstrated maternal intrusiveness  
13 and coerciveness mediated the association between maternal PPD and early childhood  
14 attachment<sup>52 53</sup>. In the current study, we did not collect data postnatally between birth and three  
15 years of age. Additionally, we did not collect postnatal information on maternal depression,  
16 anxiety, or stress. Therefore, we cannot draw conclusions regarding the combined effect of the  
17 pre- and postnatal environment on child neurodevelopmental outcomes. Strengths of the current  
18 analyses include our large sample size, evaluation of both cognitive and social-emotional  
19 outcomes within the same cohort, finally the detailed prospective collection of both depression  
20 and anxiety symptoms during pregnancy<sup>27</sup> in addition to other potential confounders.  
21  
22  
23  
24  
25  
26  
27  
28  
29  
30  
31  
32  
33  
34  
35  
36  
37  
38  
39  
40  
41  
42  
43  
44

45 Our results suggest comorbid prenatal maternal depression and chronic anxiety have a  
46 greater impact on child social-emotional and cognitive development than either condition alone  
47 or than comorbid prenatal maternal depression and transitory anxiety during pregnancy. These  
48 findings are supported by a robust literature within the DOHaD framework linking perturbations  
49 in the gestational environment to later neurodevelopmental or psychiatric sequelae. Our results  
50  
51  
52  
53  
54  
55  
56  
57  
58  
59  
60

1  
2  
3 also lend support for future intervention studies aimed at perinatal mental health interventions  
4  
5 targeting maternal depressive and anxiety symptoms to improve long-term child social-emotional  
6  
7 and cognitive developmental outcomes.  
8  
9  
10  
11  
12  
13  
14  
15  
16  
17  
18  
19  
20  
21  
22  
23  
24  
25  
26  
27  
28  
29  
30  
31  
32  
33  
34  
35  
36  
37  
38  
39  
40  
41  
42  
43  
44  
45  
46  
47  
48  
49  
50  
51  
52  
53  
54  
55  
56  
57  
58  
59  
60

For peer review only

| <b>Table 1 - Sociodemographic characteristics</b> |                                   |                           |
|---------------------------------------------------|-----------------------------------|---------------------------|
|                                                   | Mean ± SD or N (%)                | N and Percent Missing (%) |
| <b>Maternal Characteristics</b>                   |                                   |                           |
| Maternal Age (years)                              | 25.26 ± 5.91                      | 0 (0%)                    |
| Maternal Body Mass Index (BMI)                    |                                   | 0 (0%)                    |
|                                                   | BMI <18.5 (kg/m <sup>2</sup> )    | 62 (10.33%)               |
|                                                   | BMI 18.5-25 (kg/m <sup>2</sup> )  | 282 (47%)                 |
|                                                   | BMI 25-30 (kg/m <sup>2</sup> )    | 132 (22%)                 |
|                                                   | BMI >30 (kg/m <sup>2</sup> )      | 124 (20.67%)              |
| Parity                                            |                                   | 0 (0%)                    |
|                                                   | Parity <1                         | 218 (36.33%)              |
|                                                   | Parity =1                         | 196 (32.67%)              |
|                                                   | Parity =2                         | 103 (17.17%)              |
|                                                   | Parity ≥3                         | 83 (13.83%)               |
| Antenatal care visits                             |                                   | 0 (0%)                    |
|                                                   | antenatal care visit <3           | 49 (8.17%)                |
|                                                   | antenatal care visit 3-6          | 389 (64.83%)              |
|                                                   | antenatal care visit >6           | 162 (27%)                 |
| Cesarean Section                                  | 106 (17.70%)                      | 1 (0.1%)                  |
| Education                                         |                                   | 0 (0%)                    |
|                                                   | Some primary school               | 43 (7.167%)               |
|                                                   | Some high school                  | 405 (67.57%)              |
|                                                   | Completed high school             | 119 (19.83%)              |
|                                                   | Beyond high school                | 33 (5.5%)                 |
| Married                                           | 290 (48.33%)                      | 0 (0%)                    |
| Employed                                          | 172 (28.67%)                      | 0 (0%)                    |
| Adjusted Household Crowding                       | 1.56 ± 0.72                       | 2 (0.33%)                 |
| Depression (Edinburgh ≥13)                        | 333 (55%)                         | 0 (0%)                    |
| Anxiety (State-Trait Anxiety Inventory ≥40)       | 115 (19.17%)                      | 0 (0%)                    |
| Maternal Prenatal Alcohol Use                     |                                   | 0 (0%)                    |
|                                                   | Non drinking                      | 245 (46.93%)              |
|                                                   | Moderate-high continuous drinking | 122 (23.37%)              |
|                                                   | Low continuous drinking           | 26 (4.98%)                |
|                                                   | Quit early drinking               | 129 (24.71%)              |
| Maternal Prenatal Tobacco Use                     |                                   | 2 (0.33%)                 |
|                                                   | Non smoking                       | 227 (37.97%)              |

|                                                                          |                                   |                  |           |
|--------------------------------------------------------------------------|-----------------------------------|------------------|-----------|
|                                                                          | Moderate-high continuous smoking  | 132 (22.07%)     |           |
|                                                                          | Low continuous smoking            | 222 (37.12%)     |           |
|                                                                          | Quit early smoking                | 17 (2.84%)       |           |
|                                                                          | Raw Maternal Edinburgh Score      | 12.99 ± 5.73     | 0 (0%)    |
|                                                                          | Raw Maternal State Anxiety Score  | 31.23 ± 10.24    | 0 (0%)    |
|                                                                          | Raw Maternal Trait Anxiety Score  | 40.63 ± 10.63    | 0 (0%)    |
|                                                                          | Depression - Trait Anxiety Groups |                  | 0 (0%)    |
|                                                                          | No depression or trait anxiety    | 199 (33.17%)     |           |
|                                                                          | Depression alone                  | 106 (17.67%)     |           |
|                                                                          | Trait anxiety alone               | 68 (11.33%)      |           |
|                                                                          | Depression and trait anxiety      | 227 (37.83%)     |           |
|                                                                          | Depression - State Anxiety Groups |                  | 0 (0%)    |
|                                                                          | No depression or state anxiety    | 248 (41.33%)     |           |
|                                                                          | Depression alone                  | 237 (39.50%)     |           |
|                                                                          | State anxiety alone               | 19 (3.17%)       |           |
|                                                                          | Depression and state anxiety      | 96 (16%)         |           |
| <b>Infant Characteristics</b>                                            |                                   |                  |           |
|                                                                          | Infant Sex                        |                  | 0 (0%)    |
|                                                                          | Male                              | 326 (54.33%)     |           |
|                                                                          | Female                            | 274 (45.67%)     |           |
|                                                                          | Gestational age at birth (weeks)  | 38.89 ± 2.03     | 0 (0%)    |
|                                                                          | Infant Birth weight (grams)       | 2980.65 ± 564.65 | 2 (0.33%) |
|                                                                          | Follow-up age (months)            | 38.29 ± 2.96     | 0 (0%)    |
|                                                                          | Adjusted follow-up age (months)   | 38.14 ± 0.016    | 0 (0%)    |
| <b>Table 2. Neurodevelopmental Outcome Raw Scores and At-risk Groups</b> |                                   |                  |           |
|                                                                          | Raw Mullen Scores                 |                  |           |
|                                                                          | Gross motor                       | 25.47 ± 4.34     |           |
|                                                                          | Fine motor                        | 23.55 ± 4.08     |           |
|                                                                          | Problem solving                   | 13.40 ± 6.77     |           |
|                                                                          | Receptive language                | 21.69 ± 5.10     |           |
|                                                                          | Expressive language               | 21.27 ± 3.78     |           |
|                                                                          | At-Risk Categories                |                  |           |
|                                                                          | Gross motor                       | 21 (3.5%)        |           |
|                                                                          | Fine motor                        | 18 (3%)          |           |
|                                                                          | Cognitive                         | 24 (4.0%)        |           |
|                                                                          | Receptive language                | 33 (5.50%)       |           |
|                                                                          | Expressive language               | 25 (4.17%)       |           |

|                                                           |                          |              |
|-----------------------------------------------------------|--------------------------|--------------|
| Brief Infant Toddler Social-Emotional Assessment (BITSEA) |                          |              |
|                                                           | Social Emotional Problem | 13.4 ± 6.77  |
|                                                           | Competence               | 19.55 ± 2.07 |
| At-Risk Categories                                        |                          |              |
|                                                           | Social Emotional Problem | 310 (50%)    |
|                                                           | Competence               | 34 (5%)      |

## References

- O'Donnell KJ, Meaney MJ. Fetal Origins of Mental Health: The Developmental Origins of Health and Disease Hypothesis. *Am J Psychiatry* 2017;174(4):319-28. doi: 10.1176/appi.ajp.2016.16020138 [published Online First: 2016/11/15]
- Hofer MA. *The Roots of Human Behavior: An Introduction to the Psychobiology of Early Development*. San Francisco, CA: W. H. Freeman & Company 1981.
- Stein DJ, Koen N, Donald KA, et al. Investigating the psychosocial determinants of child health in Africa: The Drakenstein Child Health Study. *J Neurosci Methods* 2015;252:27-35. doi: 10.1016/j.jneumeth.2015.03.016 [published Online First: 2015/03/24]
- Herba CM, Glover V, Ramchandani PG, et al. Maternal depression and mental health in early childhood: an examination of underlying mechanisms in low-income and middle-income countries. *Lancet Psychiatry* 2016;3(10):983-92. doi: 10.1016/S2215-0366(16)30148-1 [published Online First: 2016/09/22]
- Monk C, Lugo-Candelas C, Trumppff C. Prenatal Developmental Origins of Future Psychopathology: Mechanisms and Pathways. *Annu Rev Clin Psychol* 2019;15:317-44. doi: 10.1146/annurev-clinpsy-050718-095539 [published Online First: 2019/02/24]
- Madigan S, Oatley H, Racine N, et al. A Meta-Analysis of Maternal Prenatal Depression and Anxiety on Child Socioemotional Development. *J Am Acad Child Adolesc Psychiatry* 2018;57(9):645-57 e8. doi: 10.1016/j.jaac.2018.06.012
- King S, Laplante DP. The effects of prenatal maternal stress on children's cognitive development: Project Ice Storm. *Stress* 2005;8(1):35-45. doi: 10.1080/10253890500108391
- Huizink AC, Robles de Medina PG, Mulder EJ, et al. Stress during pregnancy is associated with developmental outcome in infancy. *J Child Psychol Psychiatry* 2003;44(6):810-8. doi: 10.1111/1469-7610.00166 [published Online First: 2003/09/10]
- Leis JA, Heron J, Stuart EA, et al. Associations between maternal mental health and child emotional and behavioral problems: does prenatal mental health matter? *J Abnorm Child Psychol* 2014;42(1):161-71. doi: 10.1007/s10802-013-9766-4
- O'Connor TG, Heron J, Golding J, et al. Maternal antenatal anxiety and children's behavioural/emotional problems at 4 years. Report from the Avon Longitudinal Study of Parents and Children. *Br J Psychiatry* 2002;180:502-8.
- O'Donnell KJ, Glover V, Barker ED, et al. The persisting effect of maternal mood in pregnancy on childhood psychopathology. *Dev Psychopathol* 2014;26(2):393-403. doi: 10.1017/S0954579414000029

12. Loomans EM, van der Stelt O, van Eijnsden M, et al. Antenatal maternal anxiety is associated with problem behaviour at age five. *Early Hum Dev* 2011;87(8):565-70. doi: 10.1016/j.earlhumdev.2011.04.014
13. Rice F, Harold GT, Boivin J, et al. The links between prenatal stress and offspring development and psychopathology: disentangling environmental and inherited influences. *Psychol Med* 2010;40(2):335-45. doi: 10.1017/S0033291709005911
14. Ronald A, Pennell CE, Whitehouse AJ. Prenatal Maternal Stress Associated with ADHD and Autistic Traits in early Childhood. *Front Psychol* 2010;1:223. doi: 10.3389/fpsyg.2010.00223 [published Online First: 2010/01/01]
15. Lereya ST, Wolke D. Prenatal family adversity and maternal mental health and vulnerability to peer victimisation at school. *J Child Psychol Psychiatry* 2013;54(6):644-52. doi: 10.1111/jcpp.12012
16. Rogers A, Obst S, Teague SJ, et al. Association Between Maternal Perinatal Depression and Anxiety and Child and Adolescent Development: A Meta-analysis. *JAMA Pediatr* 2020;174(11):1082-92. doi: 10.1001/jamapediatrics.2020.2910 [published Online First: 2020/09/15]
17. Van den Bergh BRH, van den Heuvel MI, Lahti M, et al. Prenatal developmental origins of behavior and mental health: The influence of maternal stress in pregnancy. *Neurosci Biobehav Rev* 2017 doi: 10.1016/j.neubiorev.2017.07.003 [published Online First: 2017/08/02]
18. Eshetu EB, Woldesenbet SA. Are there particular social determinants of health for the world's poorest countries? *African Health Sciences* 2011;11(1):108 - 15.
19. Davies T, Rahman A, Lund C. Psychotherapy for perinatal mental disorders in low- and middle-income countries. In *Global Mental Health in Practice, Global Mental Health and Psychotherapy*: Academic Press, 2019:301 - 19.
20. Gordon S, Rotheram-Fuller E, Rezvan P, et al. Maternal depressed mood and child development over the first five years of life in South Africa. *J Affect Disord* 2021;294:346-56. doi: 10.1016/j.jad.2021.07.027 [published Online First: 2021/07/28]
21. Heyningen TV, Myer L, Onah M, et al. Antenatal depression and adversity in urban South Africa. *J Affect Disord* 2016;203:121-29. doi: 10.1016/j.jad.2016.05.052 [published Online First: 2016/06/11]
22. Redinger S, Norris SA, Pearson RM, et al. First trimester antenatal depression and anxiety: prevalence and associated factors in an urban population in Soweto, South Africa. *J Dev Orig Health Dis* 2018;9(1):30-40. doi: 10.1017/S204017441700071X [published Online First: 2017/09/08]
23. Redinger S, Pearson RM, Houle B, et al. Antenatal depression and anxiety across pregnancy in urban South Africa. *J Affect Disord* 2020;277:296-305. doi: 10.1016/j.jad.2020.08.010 [published Online First: 2020/08/29]
24. Drysdale RE, Slemming W, Makusha T, et al. Father involvement, maternal depression and child nutritional outcomes in Soweto, South Africa. *Matern Child Nutr* 2021;17 Suppl 1:e13177. doi: 10.1111/mcn.13177 [published Online First: 2021/07/10]
25. Ramchandani PG, Richter LM, Norris SA, et al. Maternal prenatal stress and later child behavioral problems in an urban South African setting. *J Am Acad Child Adolesc Psychiatry* 2010;49(3):239-47. [published Online First: 2010/04/23]
26. Donald KA, Wedderburn CJ, Barnett W, et al. Risk and protective factors for child development: An observational South African birth cohort. *PLoS Med*



- 2019;16(9):e1002920. doi: 10.1371/journal.pmed.1002920 [published Online First: 2019/09/29]
27. Dukes KA, Burd L, Elliott AJ, et al. The Safe Passage Study: Design, Methods, Recruitment, and Follow-Up Approach. *Paediatr Perinat Ep* 2014;28(5):455-65. doi: 10.1111/ppe.12136
28. Dukes K, Tripp T, Petersen J, et al. A modified Timeline Followback assessment to capture alcohol exposure in pregnant women: Application in the Safe Passage Study. *Alcohol* 2017;62:17-27. doi: 10.1016/j.alcohol.2017.02.174
29. Lawrie TA, Hofmeyr GJ, de Jager M, et al. Validation of the Edinburgh Postnatal Depression Scale on a cohort of South African women. *S Afr Med J* 1998;88(10):1340-4. [published Online First: 1998/11/10]
30. Alvarado R, Jadresic E, Guajardo V, et al. First validation of a Spanish-translated version of the Edinburgh postnatal depression scale (EPDS) for use in pregnant women. A Chilean study. *Arch Womens Ment Health* 2015;18(4):607-12. doi: 10.1007/s00737-014-0466-z [published Online First: 2014/10/11]
31. Hartley M, Tomlinson M, Greco E, et al. Depressed mood in pregnancy: prevalence and correlates in two Cape Town peri-urban settlements. *Reprod Health* 2011;8:9. doi: 10.1186/1742-4755-8-9 [published Online First: 2011/05/04]
32. Spielberger CD. Manual for the State-Trait Anxiety Inventory: STAI. Palo Alto, CA: Consulting Psychologists Press, 1983.
33. Pretorius TB, Norman AM. Psychometric Data on the Statistics Anxiety Scale for a Sample of South-African Students. *Educational and Psychological Measurement* 1992;52(4):933-37. doi: Doi 10.1177/0013164492052004015
34. Bayley N. Bayley scales of infant and toddler development: Bayley-III San Antonio, Texas, USA: Harcourt Assessment, Psych. Corporation. 2006.
35. Rademeyer V, Jacklin L. A study to evaluate the performance of black South African urban infants on the Bayley Scales of Infant Development III. *South African Journal of Child Health* 2013;7(2):54-59.
36. Ballot DE, Ramdin T, Rakotsoane D, et al. Use of the Bayley Scales of Infant and Toddler Development, Third Edition, to Assess Developmental Outcome in Infants and Young Children in an Urban Setting in South Africa. *Int Sch Res Notices* 2017;2017:1631760. doi: 10.1155/2017/1631760 [published Online First: 2017/08/25]
37. Gowan B, Carter MJ, Carter AS. ITSEA/BITSEA: Infant-Toddler and Brief Infant-Toddler Social and Emotional Assessment. *The Psychological Corporation* 2006
38. Kruizinga I, Visser JC, van Batenburg-Eddes T, et al. Screening for autism spectrum disorders with the brief infant-toddler social and emotional assessment. *PLoS One* 2014;9(5):e97630. doi: 10.1371/journal.pone.0097630 [published Online First: 2014/05/24]
39. Sang S, Nelson, JA. The effect of siblings on children's social skills and perspective taking. *Inf Child Dev* 201, 26:e2023. doi: 10.1002/icd.2023.
40. Downey DB CD, Yucel D. Number of siblings and social skills revisited among american fifth graders. *Journal of Family Issues* 2015, 36(2):273-96. doi: 10.1177/0192513X13507569
41. Ghassabian A, Albert PS, Hornig M, et al. Gestational cytokine concentrations and neurocognitive development at 7 years. *Transl Psychiat* 2018;8 doi: ARTN 64 10.1038/s41398-018-0112-z

- 1
- 2
- 3
- 4 42. Ruiz RJ, Avant KC. Effects of maternal prenatal stress on infant outcomes - A synthesis of
- 5 the literature. *Adv Nurs Sci* 2005;28(4):345-55. doi: Doi 10.1097/00012272-200510000-
- 6 00006
- 7 43. Short SJ, Lubach GR, Karasin AI, et al. Maternal influenza infection during pregnancy
- 8 impacts postnatal brain development in the rhesus monkey. *Biol Psychiatry*
- 9 2010;67(10):965-73. doi: 10.1016/j.biopsych.2009.11.026 [published Online First:
- 10 2010/01/19]
- 11 44. Paolicelli RC, Bolasco G, Pagani F, et al. Synaptic pruning by microglia is necessary for
- 12 normal brain development. *Science* 2011;333(6048):1456-8. doi:
- 13 10.1126/science.1202529 [published Online First: 2011/07/23]
- 14 45. Bergdolt L, Dunaevsky A. Brain changes in a maternal immune activation model of
- 15 neurodevelopmental brain disorders. *Prog Neurobiol* 2019;175:1-19. doi:
- 16 10.1016/j.pneurobio.2018.12.002 [published Online First: 2018/12/28]
- 17 46. Meyer U. Neurodevelopmental Resilience and Susceptibility to Maternal Immune
- 18 Activation. *Trends Neurosci* 2019;42(11):793-806. doi: 10.1016/j.tins.2019.08.001
- 19 [published Online First: 2019/09/09]
- 20 47. Patterson PH. Maternal infection: window on neuroimmune interactions in fetal brain
- 21 development and mental illness. *Curr Opin Neurobiol* 2002;12(1):115-8. doi:
- 22 10.1016/s0959-4388(02)00299-4 [published Online First: 2002/02/28]
- 23 48. Bland ST, Beckley JT, Young S, et al. Enduring consequences of early-life infection on glial
- 24 and neural cell genesis within cognitive regions of the brain. *Brain Behav Immun*
- 25 2010;24(3):329-38. doi: 10.1016/j.bbi.2009.09.012 [published Online First: 2009/09/29]
- 26 49. Money KM, Barke TL, Serezani A, et al. Gestational diabetes exacerbates maternal immune
- 27 activation effects in the developing brain. *Mol Psychiatry* 2018;23(9):1920-28. doi:
- 28 10.1038/mp.2017.191 [published Online First: 2017/09/28]
- 29 50. Bilbo SD, Schwarz JM. Early-life programming of later-life brain and behavior: a critical
- 30 role for the immune system. *Front Behav Neurosci* 2009;3:14. doi:
- 31 10.3389/neuro.08.014.2009 [published Online First: 2009/09/10]
- 32 51. Buss C, Davis EP, Shahbaba B, et al. Maternal cortisol over the course of pregnancy and
- 33 subsequent child amygdala and hippocampus volumes and affective problems. *P Natl*
- 34 *Acad Sci USA* 2012;109(20):E1312-E19. doi: 10.1073/pnas.1201295109
- 35 52. Cooper PJ, Tomlinson M, Swartz L, et al. Post-partum depression and the mother-infant
- 36 relationship in a South African peri-urban settlement. *Br J Psychiatry* 1999;175:554-8.
- 37 doi: 10.1192/bjp.175.6.554 [published Online First: 2000/05/02]
- 38 53. Tomlinson M, Cooper P, Murray L. The mother-infant relationship and infant attachment in a
- 39 South African peri-urban settlement. *Child Dev* 2005;76(5):1044-54. doi: 10.1111/j.1467-
- 40 8624.2005.00896.x [published Online First: 2005/09/10]
- 41
- 42
- 43
- 44
- 45
- 46
- 47
- 48
- 49
- 50
- 51
- 52
- 53
- 54
- 55
- 56
- 57
- 58
- 59
- 60

1  
2  
3 **Contributors:** WPF and HJO acquired funding for and designed the work. LCS, AS, NHB, ML,  
4 YR, PES, HJO, and WPF conceptualized the work. MP, PES, CDP, and HJO acquired the data.  
5  
6 LCS, NHB, and WPF led in data collection oversight and quality control. AS, LCS, and YR  
7  
8 analyzed the data. All authors contributed to the interpretation of data and drafting the work and  
9  
10 revising it critically for important intellectual content. All authors approved the final manuscript  
11  
12 and agree to be accountable for all aspects of the work.  
13  
14  
15  
16  
17  
18

19 **Acknowledgements:** We would like to acknowledge Lucy Brink, J. David Nugent, and Daianna  
20  
21 Rodriguez for their database and administrative support. We would also like to thank all of the  
22  
23 families who participated in this research study for making this work possible.  
24  
25  
26  
27

## 28 **Ethics statements**

### 29 **Patient consent for publication**

30  
31 Not applicable.  
32  
33  
34  
35  
36  
37

### 38 **Ethics approval**

39  
40 Ethics approval was received from the Institutional Review Boards and ethics review committees  
41  
42 at Stellenbosch University (N16-08-101 and N06-10-210) and the New York State Psychiatric  
43  
44 Institute (5338). All participants provided informed written consent at both time points (prenatal  
45  
46 and postnatal) before inclusion in the study.  
47  
48  
49  
50  
51  
52  
53  
54  
55  
56  
57  
58  
59  
60

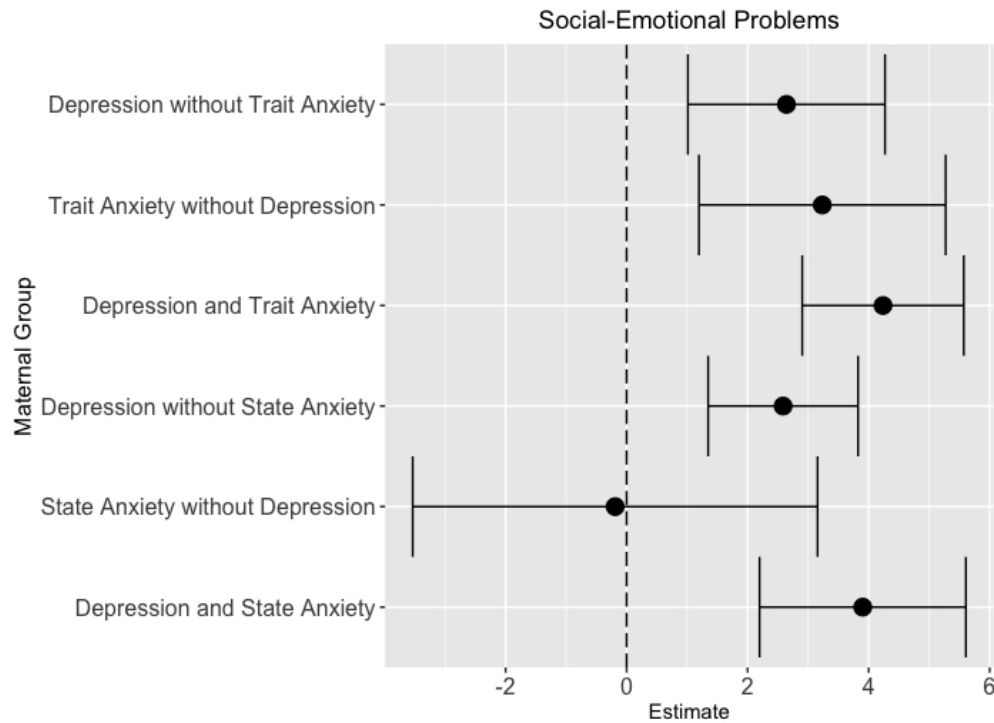

Figure 1. Association between prenatal maternal depression, prenatal maternal anxiety, and child social-emotional problems measured by the BITSEA. Each line plot depicts the mean difference and their confidence interval for child social-emotional problems (x-axis) for each prenatal maternal mental health group (y-axis). Either no prenatal maternal depression and state anxiety or no prenatal maternal depression and trait anxiety were the reference groups. Models were adjusted for sex, gestational age at birth, age at follow-up, prenatal maternal alcohol use, prenatal maternal tobacco use, maternal employment status at delivery, maternal educational attainment at delivery, parity, and the household crowding index.

247x181mm (72 x 72 DPI)

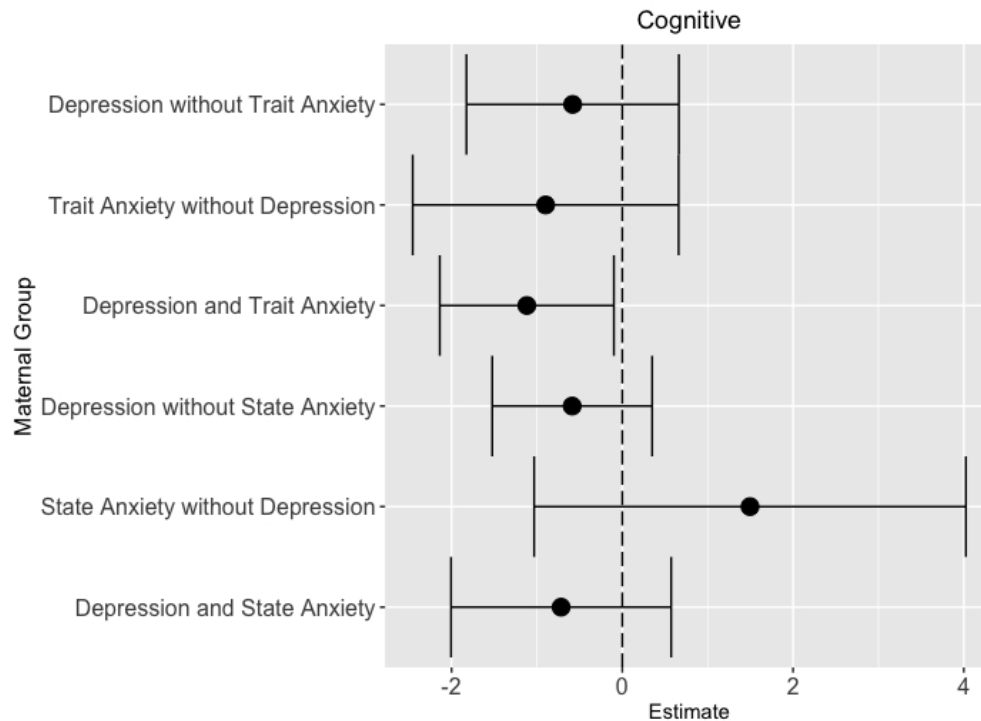

30  
31  
32  
33  
34  
35  
36  
37  
38  
39  
40  
41  
42  
43  
44  
45  
46  
47  
48  
49  
50  
51  
52  
53  
54  
55  
56  
57  
58  
59  
60

Figure 2. . Association between prenatal maternal depression, prenatal maternal anxiety, and child cognitive development measured by the BSID-III Screening Test. Each line plot depicts the mean difference and their confidence interval for child cognitive development (x-axis) for each prenatal maternal mental health group (y-axis). Either no prenatal maternal depression and state anxiety or no prenatal maternal depression and trait anxiety were the reference groups. Models were adjusted for sex, gestational age at birth, age at follow-up, prenatal maternal alcohol use, prenatal maternal tobacco use, maternal employment status at delivery, maternal educational attainment at delivery, parity, and the household crowding index.

247x181mm (72 x 72 DPI)

STROBE Statement—Checklist of items that should be included in reports of *cohort studies*

|                           | Item No | Recommendation                                                                                                                                                                                                                                                                                                         | Page No                             |
|---------------------------|---------|------------------------------------------------------------------------------------------------------------------------------------------------------------------------------------------------------------------------------------------------------------------------------------------------------------------------|-------------------------------------|
| <b>Title and abstract</b> | 1       | (a) Indicate the study's design with a commonly used term in the title or the abstract<br>(b) Provide in the abstract an informative and balanced summary of what was done and what was found                                                                                                                          | 2<br>3, 4                           |
| <b>Introduction</b>       |         |                                                                                                                                                                                                                                                                                                                        |                                     |
| Background/rationale      | 2       | Explain the scientific background and rationale for the investigation being reported                                                                                                                                                                                                                                   | 5, 6                                |
| Objectives                | 3       | State specific objectives, including any prespecified hypotheses                                                                                                                                                                                                                                                       | 6                                   |
| <b>Methods</b>            |         |                                                                                                                                                                                                                                                                                                                        |                                     |
| Study design              | 4       | Present key elements of study design early in the paper                                                                                                                                                                                                                                                                | 7 - 9                               |
| Setting                   | 5       | Describe the setting, locations, and relevant dates, including periods of recruitment, exposure, follow-up, and data collection                                                                                                                                                                                        | 7 - 9                               |
| Participants              | 6       | (a) Give the eligibility criteria, and the sources and methods of selection of participants. Describe methods of follow-up<br>(b) For matched studies, give matching criteria and number of exposed and unexposed                                                                                                      | 7 - 9<br>N/A                        |
| Variables                 | 7       | Clearly define all outcomes, exposures, predictors, potential confounders, and effect modifiers. Give diagnostic criteria, if applicable                                                                                                                                                                               | 9 - 10                              |
| Data sources/measurement  | 8*      | For each variable of interest, give sources of data and details of methods of assessment (measurement). Describe comparability of assessment methods if there is more than one group                                                                                                                                   | 7 - 10                              |
| Bias                      | 9       | Describe any efforts to address potential sources of bias                                                                                                                                                                                                                                                              | 10                                  |
| Study size                | 10      | Explain how the study size was arrived at                                                                                                                                                                                                                                                                              | 11                                  |
| Quantitative variables    | 11      | Explain how quantitative variables were handled in the analyses. If applicable, describe which groupings were chosen and why                                                                                                                                                                                           | 9 - 10                              |
| Statistical methods       | 12      | (a) Describe all statistical methods, including those used to control for confounding<br>(b) Describe any methods used to examine subgroups and interactions<br>(c) Explain how missing data were addressed<br>(d) If applicable, explain how loss to follow-up was addressed<br>(e) Describe any sensitivity analyses | 9 - 10<br>9 - 10<br>10<br>10<br>N/A |
| <b>Results</b>            |         |                                                                                                                                                                                                                                                                                                                        |                                     |
| Participants              | 13*     | (a) Report numbers of individuals at each stage of study—eg numbers potentially eligible, examined for eligibility, confirmed eligible, included in the study, completing follow-up, and analysed<br>(b) Give reasons for non-participation at each stage<br>(c) Consider use of a flow diagram                        | 11<br>11                            |
| Descriptive data          | 14*     | (a) Give characteristics of study participants (eg demographic, clinical, social) and information on exposures and potential confounders<br>(b) Indicate number of participants with missing data for each variable of interest<br>(c) Summarise follow-up time (eg, average and total amount)                         | 9, 11 - 13<br>10                    |
| Outcome data              | 15*     | Report numbers of outcome events or summary measures over time                                                                                                                                                                                                                                                         | 11                                  |

|    |                          |    |                                                                                                                                                                                                              |         |
|----|--------------------------|----|--------------------------------------------------------------------------------------------------------------------------------------------------------------------------------------------------------------|---------|
| 1  | Main results             | 16 | (a) Give unadjusted estimates and, if applicable, confounder-adjusted estimates and their precision (eg, 95% confidence interval). Make clear which confounders were adjusted for and why they were included | 11 - 13 |
| 2  |                          |    | (b) Report category boundaries when continuous variables were categorized                                                                                                                                    | N/A     |
| 3  |                          |    | (c) If relevant, consider translating estimates of relative risk into absolute risk for a meaningful time period                                                                                             |         |
| 4  |                          |    |                                                                                                                                                                                                              |         |
| 5  |                          |    |                                                                                                                                                                                                              |         |
| 6  |                          |    |                                                                                                                                                                                                              |         |
| 7  |                          |    |                                                                                                                                                                                                              |         |
| 8  |                          |    |                                                                                                                                                                                                              |         |
| 9  | Other analyses           | 17 | Report other analyses done—eg analyses of subgroups and interactions, and sensitivity analyses                                                                                                               | 11 - 13 |
| 10 |                          |    |                                                                                                                                                                                                              |         |
| 11 | <b>Discussion</b>        |    |                                                                                                                                                                                                              |         |
| 12 |                          |    |                                                                                                                                                                                                              |         |
| 13 | Key results              | 18 | Summarise key results with reference to study objectives                                                                                                                                                     | 14      |
| 14 | Limitations              | 19 | Discuss limitations of the study, taking into account sources of potential bias or imprecision. Discuss both direction and magnitude of any potential bias                                                   | 17      |
| 15 |                          |    |                                                                                                                                                                                                              |         |
| 16 | Interpretation           | 20 | Give a cautious overall interpretation of results considering objectives, limitations, multiplicity of analyses, results from similar studies, and other relevant evidence                                   | 17      |
| 17 |                          |    |                                                                                                                                                                                                              |         |
| 18 |                          |    |                                                                                                                                                                                                              |         |
| 19 | Generalisability         | 21 | Discuss the generalisability (external validity) of the study results                                                                                                                                        | 17      |
| 20 |                          |    |                                                                                                                                                                                                              |         |
| 21 | <b>Other information</b> |    |                                                                                                                                                                                                              |         |
| 22 | Funding                  | 22 | Give the source of funding and the role of the funders for the present study and, if applicable, for the original study on which the present article is based                                                | 1       |
| 23 |                          |    |                                                                                                                                                                                                              |         |
| 24 |                          |    |                                                                                                                                                                                                              |         |

25  
26 \*Give information separately for exposed and unexposed groups.

27  
28 **Note:** An Explanation and Elaboration article discusses each checklist item and gives methodological background and  
29 published examples of transparent reporting. The STROBE checklist is best used in conjunction with this article (freely  
30 available on the Web sites of PLoS Medicine at <http://www.plosmedicine.org/>, Annals of Internal Medicine at  
31 <http://www.annals.org/>, and Epidemiology at <http://www.epidem.com/>). Information on the STROBE Initiative is  
32 available at <http://www.strobe-statement.org>.  
33  
34  
35  
36  
37  
38  
39  
40  
41  
42  
43  
44  
45  
46  
47  
48  
49  
50  
51  
52  
53  
54  
55  
56  
57  
58  
59  
60

# BMJ Open

## Association of Maternal Depression and Anxiety with Toddler Social-Emotional and Cognitive Development in South Africa: A prospective cohort study

|                                 |                                                                                                                                                                                                                                                                                                                                                                                                                                                                                                                                                                                                                                                                                                                                                                                                                                                                                                                                                                                                                                                                                                                                                                                                                                            |
|---------------------------------|--------------------------------------------------------------------------------------------------------------------------------------------------------------------------------------------------------------------------------------------------------------------------------------------------------------------------------------------------------------------------------------------------------------------------------------------------------------------------------------------------------------------------------------------------------------------------------------------------------------------------------------------------------------------------------------------------------------------------------------------------------------------------------------------------------------------------------------------------------------------------------------------------------------------------------------------------------------------------------------------------------------------------------------------------------------------------------------------------------------------------------------------------------------------------------------------------------------------------------------------|
| Journal:                        | <i>BMJ Open</i>                                                                                                                                                                                                                                                                                                                                                                                                                                                                                                                                                                                                                                                                                                                                                                                                                                                                                                                                                                                                                                                                                                                                                                                                                            |
| Manuscript ID                   | bmjopen-2021-058135.R1                                                                                                                                                                                                                                                                                                                                                                                                                                                                                                                                                                                                                                                                                                                                                                                                                                                                                                                                                                                                                                                                                                                                                                                                                     |
| Article Type:                   | Original research                                                                                                                                                                                                                                                                                                                                                                                                                                                                                                                                                                                                                                                                                                                                                                                                                                                                                                                                                                                                                                                                                                                                                                                                                          |
| Date Submitted by the Author:   | 22-Feb-2022                                                                                                                                                                                                                                                                                                                                                                                                                                                                                                                                                                                                                                                                                                                                                                                                                                                                                                                                                                                                                                                                                                                                                                                                                                |
| Complete List of Authors:       | Shuffrey, Lauren; Columbia University Irving Medical Center, Psychiatry; New York State Psychiatric Institute, Division of Developmental Neuroscience<br>Sania, Ayesha; Columbia University Irving Medical Center, Psychiatry; New York State Psychiatric Institute, Division of Developmental Neuroscience<br>Brito, Natalie; New York University, Department of Applied Psychology<br>Potter, Mandy; Stellenbosch University Faculty of Medicine and Health Sciences, Obstetrics and Gynaecology<br>Springer, Priscilla; Stellenbosch University, Paediatrics and Child Health<br>Lucchini, Maristella ; Columbia University Irving Medical Center, Psychiatry; New York State Psychiatric Institute, Neuroscience<br>Rayport, Yael; Columbia University Irving Medical Center, Department of Psychiatry; New York State Psychiatric Institute, Neuroscience<br>Du Plessis, Carlie; Stellenbosch University Faculty of Medicine and Health Sciences, Department of Obstetrics and Gynaecology<br>Odendaal, H. J.; Stellenbosch University Faculty of Medicine and Health Sciences, Obstetrics & Gynaecology<br>Fifer, William; Columbia University Irving Medical Center, Psychiatry; New York State Psychiatric Institute, Neuroscience |
| <b>Primary Subject Heading</b>: | Global health                                                                                                                                                                                                                                                                                                                                                                                                                                                                                                                                                                                                                                                                                                                                                                                                                                                                                                                                                                                                                                                                                                                                                                                                                              |
| Secondary Subject Heading:      | Mental health, Paediatrics                                                                                                                                                                                                                                                                                                                                                                                                                                                                                                                                                                                                                                                                                                                                                                                                                                                                                                                                                                                                                                                                                                                                                                                                                 |
| Keywords:                       | Community child health < PAEDIATRICS, Depression & mood disorders < PSYCHIATRY, Anxiety disorders < PSYCHIATRY, Child & adolescent psychiatry < PSYCHIATRY                                                                                                                                                                                                                                                                                                                                                                                                                                                                                                                                                                                                                                                                                                                                                                                                                                                                                                                                                                                                                                                                                 |
|                                 |                                                                                                                                                                                                                                                                                                                                                                                                                                                                                                                                                                                                                                                                                                                                                                                                                                                                                                                                                                                                                                                                                                                                                                                                                                            |

SCHOLARONE™  
Manuscripts





I, the Submitting Author has the right to grant and does grant on behalf of all authors of the Work (as defined in the below author licence), an exclusive licence and/or a non-exclusive licence for contributions from authors who are: i) UK Crown employees; ii) where BMJ has agreed a CC-BY licence shall apply, and/or iii) in accordance with the terms applicable for US Federal Government officers or employees acting as part of their official duties; on a worldwide, perpetual, irrevocable, royalty-free basis to BMJ Publishing Group Ltd ("BMJ") its licensees and where the relevant Journal is co-owned by BMJ to the co-owners of the Journal, to publish the Work in this journal and any other BMJ products and to exploit all rights, as set out in our [licence](#).

The Submitting Author accepts and understands that any supply made under these terms is made by BMJ to the Submitting Author unless you are acting as an employee on behalf of your employer or a postgraduate student of an affiliated institution which is paying any applicable article publishing charge ("APC") for Open Access articles. Where the Submitting Author wishes to make the Work available on an Open Access basis (and intends to pay the relevant APC), the terms of reuse of such Open Access shall be governed by a Creative Commons licence – details of these licences and which [Creative Commons](#) licence will apply to this Work are set out in our licence referred to above.

Other than as permitted in any relevant BMJ Author's Self Archiving Policies, I confirm this Work has not been accepted for publication elsewhere, is not being considered for publication elsewhere and does not duplicate material already published. I confirm all authors consent to publication of this Work and authorise the granting of this licence.

**Title:** Association of Maternal Depression and Anxiety with Toddler Social-Emotional and Cognitive Development in South Africa: A prospective cohort study

**Lauren C. Shuffrey**\*<sup>1,2</sup>, **Ayesha Sania**\*<sup>1,2</sup>, Natalie H. Brito<sup>3</sup>, Mandy Potter<sup>4</sup>, Priscilla E. Springer<sup>5</sup>, Maristella Lucchini<sup>1,2</sup>, Yael K. Rayport<sup>1,2</sup>, Carlie Du Plessis<sup>4</sup>, Hein J. Odendaal<sup>4</sup>, William P. Fifer<sup>1,2,6</sup>

<sup>1</sup> Department of Psychiatry, Columbia University Irving Medical Center, New York, NY 10032 USA

<sup>2</sup> Division of Developmental Neuroscience, New York State Psychiatric Institute, New York, NY 10032 USA

<sup>3</sup> Department of Applied Psychology, New York University, New York, NY, 10003 USA

<sup>4</sup> Department of Obstetrics and Gynaecology, Faculty of Medicine and Health Science, Stellenbosch University, Cape Town, Western Cape, South Africa 7530

<sup>5</sup> Department of Paediatrics and Child Health, Stellenbosch University, Cape Town, Western Cape, South Africa 7530

<sup>6</sup> Department of Pediatrics, Columbia University Irving Medical Center, New York, NY 10032 USA

\* denotes shared authorship

**Corresponding Author:**

Lauren C. Shuffrey, PhD  
Columbia University Medical Center  
New York State Psychiatric Institute  
1051 Riverside Drive, Unit 40  
New York, New York 10032  
lcg2129@cumc.columbia.edu

**Financial Support:** This research was supported by the Bill and Melinda Gates Foundation (WPF) and grants U01HD055154, U01HD045935, U01HD055155, and U01HD045991 issued by the *Eunice Kennedy Shriver* National Institute of Child Health and Human Development (NICHD) and grant U01AA016501 issued by the National Institute on Alcohol Abuse and Alcoholism (NIAAA). Dr. Lauren Shuffrey is supported by K99HD103910 issued by the Eunice Kennedy Shriver National Institute Of Child Health & Human Development. Dr. Ayesha Sania is supported by UH3OD023279-05S1, re-entry supplement from Office of the Director, NIH, and Office of Research on Women Health (ORWH). The content is solely the responsibility of the authors and does not necessarily represent the official views of the National Institutes of Health.

**Competing Interests:** The authors have no competing interests to declare.

**Data availability:** Data are available upon reasonable request.

**Patient and Public Involvement:** Patients or the public were not involved in the design, or conduct, or reporting, or dissemination plans of our research

## **Abstract:**

**Objective:** A robust literature has identified associations between prenatal maternal depression and adverse child social-emotional and cognitive outcomes. The majority of prior research is from high-income countries despite increased reporting of perinatal depression in low and middle income countries (LMICs). Additionally, despite the comorbidity between depression and anxiety, few prior studies have examined their joint impact on child neurodevelopment. The objective of the current analysis was to examine associations between prenatal maternal depression and anxiety with child social-emotional and cognitive development in a cohort from the Western Cape Province of South Africa.

**Design:** Prenatal maternal depression and anxiety were measured using the Edinburgh Postnatal Depression Scale (EPDS) and the State-Trait Anxiety Scale (STAI) at 20 – 24 weeks' gestation. Child neurobehavior was assessed at age 3 using the Brief Infant Toddler Social Emotional Assessment (BITSEA) and the Bayley Scales of Infant Development Screening Test (BSID-III ST). We used linear regression models to examine the independent and joint association between prenatal maternal depression, anxiety, and child developmental outcomes.

**Results:** Participants consisted of 600 maternal-infant dyads (274 females; gestational age at birth: 38.89 weeks  $\pm$  2.03). Children born to mothers with both prenatal depression and trait anxiety had higher social-emotional problems (mean difference: 4.66; 95% CI 3.43, 5.90) compared to children born to mothers with no prenatal depression or trait anxiety, each condition alone, or compared to mothers with depression and state anxiety. Additionally, children born to mothers with prenatal maternal depression and trait anxiety had the greatest reduction in mean cognitive scores on the BSID-III ST (mean difference: -1.04; 95% CI -1.99, -0.08).

**Conclusions:** The observed association between comorbid prenatal maternal depression and chronic anxiety with subsequent child social-emotional and cognitive development underscores the need for targeting mental health support in perinatal women in LMICs to improve long-term child neurobehavioral outcomes.

### **Strengths and limitations of this study**

- The current study included a prospective evaluation of maternal depression and anxiety symptoms during pregnancy and prospective assessment of cognitive and social-emotional outcomes within the same cohort in a large sample of South African mother-children pairs.
- Limitations include a lack of data on maternal mental health assessments postnatally and mother-child dyadic measures, which are potential mediators of the relationship between prenatal maternal depression, prenatal maternal anxiety, and child developmental outcomes.
- This study addresses a significant gap in the literature in research examining the impact of prenatal maternal psychological health on child neurobehavioral development in resource-poor communities.

**Keywords:** prenatal depression, prenatal anxiety; social-emotional development; cognitive development

## Introduction

Decades of research on the early origins of behavior has promoted the concept that the prenatal environment has a profound impact on one's risk for the development of neurodevelopmental or psychiatric disorders<sup>1 2</sup>. Several prior studies have identified associations between prenatal maternal depression and increased risk for social-emotional problems and decrements in cognitive development. However, the majority of prior research in this domain is from high-income countries (HICs), despite increased reporting of perinatal depression in low and middle income countries (LMICs) including South Africa where an estimated 35% women report prenatal depression<sup>3 4</sup>. Additionally, despite the comorbidity between depression and anxiety, few prior studies have examined their joint impact on child neurodevelopment.

Several studies in HICs have identified associations between prenatal maternal depression, anxiety, and offspring behavioral, social-emotional, and cognitive development<sup>5</sup>. Specifically, a meta-analysis demonstrated adverse effects of prenatal maternal depression and anxiety on child social-emotional problems, with odds ratios of 1.79 and 1.50 respectively<sup>6</sup>. Prenatal maternal depression and anxiety are also associated with cognitive and language deficits<sup>7 8</sup>, delayed motor development<sup>8</sup>, emotional and behavior dysregulation<sup>9-11</sup>, inattention and hyperactivity<sup>12-14</sup>, and difficult temperament<sup>15</sup>. A more recent meta-analysis not only confirmed prior reports, but also found that the effects of perinatal maternal depression extend beyond infancy through adolescence<sup>16</sup>.

The developmental origins of health and disease (DOHaD) model posits that maternal psychological distress during pregnancy (e.g. perceived stress, depression, anxiety, post-traumatic stress) may result in changes in hypothalamic pituitary adrenal (HPA) axis function and upregulation of inflammatory processes with downstream effects on offspring perinatal brain

1  
2  
3 development and behavior<sup>17</sup>. Prior research suggests comorbid prenatal maternal depression and  
4  
5 anxiety may be associated with the greatest increases in maternal HPA-axis activity and  
6  
7 differential changes in immunologic activity. Specifically, comorbid prenatal maternal  
8  
9 depression and anxiety have been associated with a greater increase in salivary cortisol levels<sup>18</sup>,  
10  
11 TH1 secreted cytokines, TH2 secreted cytokines, and TH17 secreted cytokines<sup>19</sup> compared to  
12  
13 either condition alone. Other research suggests cytokine profiles may differ between individuals  
14  
15 with prenatal maternal depression and anxiety<sup>19-21</sup>.  
16  
17  
18

19 Risk factors may be exacerbated in LMICs such as South Africa, where both poverty and  
20  
21 perinatal mental health disorders are highly prevalent<sup>22 23</sup>. Specifically, in South Africa maternal  
22  
23 mood disorders have been linked to structural and community stressors associated with markers  
24  
25 of poverty including less than a high school education, lack of social support, alcohol use, family  
26  
27 stress, food insecurity, lack of partner involvement, and intimate partner violence<sup>24-28</sup>. There are  
28  
29 few prior studies that have examined the impact of prenatal maternal mental health on offspring  
30  
31 social-emotional or cognitive development in South Africa. While the few prior studies reported  
32  
33 significant harmful effects of prenatal maternal stress or perinatal maternal depression, there is  
34  
35 still a significant gap in the literature in research examining the impact of prenatal maternal  
36  
37 psychological health on child neurobehavioral development in resource-poor communities<sup>24 29 30</sup>.  
38  
39 Additionally, to our knowledge no prior South African studies have examined the joint effect of  
40  
41 prenatal maternal depression and anxiety on child neurobehavioral outcomes. Research  
42  
43 examining the long-term impact of prenatal maternal depression and anxiety on child behavioral  
44  
45 and cognitive outcomes is critical for providing justification to local public health services for  
46  
47 targeting mental health support in perinatal women from underserved communities.  
48  
49  
50  
51  
52  
53  
54  
55  
56  
57  
58  
59  
60

1  
2  
3 The objective of the current analysis was to determine if prenatal maternal depression and  
4 state or trait anxiety were associated with child social-emotional problems or cognitive  
5 development at approximately three years of age in a South African cohort from the Western  
6 Cape.  
7  
8  
9  
10  
11  
12  
13  
14

## 15 **Materials and Methods**

16  
17 *Participants.* Participants were a subset of infants with available outcome data at age 3 enrolled  
18 in the Safe Passage Study conducted by the Prenatal Alcohol and SIDS and Stillbirth (PASS)  
19 Network, a multi-center study investigating the role of prenatal exposure in risk for sudden infant  
20 death syndrome (SIDS), stillbirth, and fetal alcohol spectrum disorders. Eligibility criteria for the  
21 Safe Passage study included the ability to provide informed consent in English or Afrikaans, 16  
22 years of age or older at the time of consent, and a gestational age between 6 weeks and 40 weeks  
23 at the time of consent based on estimated delivery date<sup>31</sup>. Exclusion Criteria for prenatal  
24 maternal enrollment into the Safe Passage study included planned therapeutic abortion, moving  
25 out of the catchment area prior to estimated date of delivery, and clinical judgment. Informed  
26 consent was obtained for the Safe Passage study and from a parent or legal guardian of each  
27 participant for developmental follow-up assessments. Ethical approval was obtained for both  
28 time points from the Health Research Ethics Committee of Stellenbosch University and the New  
29 York State Psychiatric Institute.  
30  
31  
32  
33  
34  
35  
36  
37  
38  
39  
40  
41  
42  
43  
44  
45  
46  
47  
48  
49

### 50 **Maternal Assessments.**

51 *Maternal-infant chart abstraction, demographic, and socioeconomic measures.* Maternal-  
52 infant medical charts were abstracted to obtain maternal age at delivery, gestational age at birth,  
53  
54  
55  
56  
57  
58  
59  
60

1  
2  
3 mode of delivery, and the infant's biological sex. Measures to collect prenatal alcohol, tobacco,  
4 and recreational drug exposure have been previously described<sup>31 32</sup>. Prenatal maternal alcohol  
5 and tobacco use behaviors were previously characterized using cluster analysis<sup>33 34</sup>. Through  
6 study specific case report forms, participants indicated demographic and socioeconomic  
7 information including race, maternal educational attainment, household crowding (persons per  
8 room in household), access to running water inside the house, prenatal care during pregnancy,  
9 and marital status.

10  
11  
12  
13  
14  
15  
16  
17  
18  
19 *Self-reported depression and anxiety measures.* Information regarding maternal mental  
20 health during pregnancy was obtained at 20 – 24 weeks' gestation. Depressive symptoms were  
21 measured using the Edinburgh Postnatal Depression Scale (EPDS), a depression screening tool  
22 developed to specifically assess depressive symptoms in perinatal women where higher scores  
23 indicate more severe depressive symptoms<sup>35 36</sup>. The EPDS is widely used and has been validated  
24 in English and Afrikaans in South Africa<sup>35 37</sup>. Prior studies have used a cut-off score of  $\geq 12$  or  $\geq$   
25 13 to be indicative of major depression within perinatal women living in South Africa<sup>35 37</sup>.  
26 Maternal anxiety symptoms were measured using the State-Trait Anxiety Inventory (STAI)<sup>38</sup>, an  
27 anxiety screening tool to distinguish anxiety symptoms from depressive symptoms which has  
28 also been validated in both languages<sup>39</sup>. The STAI has two subscales, state anxiety which reflects  
29 the participant's current state of anxiety when completing the questionnaires and trait anxiety,  
30 which is thought to be consistent across time and reflect personality traits. In HICs, the STAI has  
31 a cut-off score of  $\geq 40$  on both the state anxiety and trait anxiety subscales to indicate a threshold  
32 for clinical levels of anxiety. Based on these prior studies, we used a cutoff of  $\geq 13$  to indicate  
33 maternal depression, a cutoff of  $> 40$  on the STAI-state subscale to indicate state anxiety, and a  
34  
35  
36  
37  
38  
39  
40  
41  
42  
43  
44  
45  
46  
47  
48  
49  
50  
51  
52  
53  
54  
55  
56  
57  
58  
59  
60



1  
2  
3 cutoff of > 40 on the STAI-trait subscale to indicate trait anxiety.  
4  
5  
6  
7

8 Toddler Developmental Assessments.  
9

10 *Bayley Scales of Infant Development III Screening Test.* The Bayley Scales of Infant  
11 Development III Screening Test (BSID-III ST) were designed as a rapid assessment of cognitive,  
12 language, and motor functioning in infants and young children in order to determine if a child's  
13 development is within normal limits and identify risk for developmental delay. The BSID-III ST  
14 has high test-retest reliability: Cognitive (0.85), Receptive Language (0.88), Expressive  
15 Language (0.88), Fine Motor (0.82), and Gross Motor (0.86). Although the BSID-III ST does not  
16 identify degree of impairment, the cut-off points indicate whether a child shows competence in  
17 age-appropriate tasks, evidence of emerging age-appropriate skills, and evidence of being at risk  
18 for developmental delay. The BSID has been validated and widely used throughout South  
19 Africa<sup>40 41</sup>.  
20  
21  
22  
23  
24  
25  
26  
27  
28  
29  
30  
31  
32

33 *Brief Infant Toddler Social Emotional Assessment (BITSEA).* The Brief Infant-Toddler  
34 Social and Emotional Assessment (BITSEA) is a 42-item parental report measure of social-  
35 emotional development, behavioral problems, and delays in competence<sup>42</sup>. Domains assessed  
36 within the BITSEA include: externalizing (activity/impulsivity, aggression/defiance, peer  
37 aggression), internalizing (depression/withdrawal, anxiety, separation distress, inhibition to  
38 novelty), dysregulation (sleep, negative emotionality, eating, sensory sensitivity), and  
39 competence (compliance, attention, imitation/play, mastery motivation, empathy, and pro-social  
40 peer relations)<sup>42</sup>. Findings from the BITSEA validation study provide preliminary support for the  
41 BITSEA as a reliable and valid brief screener for infant-toddler social-emotional and behavioral  
42 problems in addition to delays in competence<sup>43</sup>. When used in socioeconomically and ethnically  
43  
44  
45  
46  
47  
48  
49  
50  
51  
52  
53  
54  
55  
56  
57  
58  
59  
60

1  
2  
3 diverse community-based populations, the BITSEA demonstrated excellent test-retest reliability  
4  
5 and good inter-rater agreement between parents<sup>42</sup>.  
6  
7  
8  
9

10 Statistical Analyses. Using multiple linear regression models, we estimated independent and  
11 joint effects of maternal depression and state and trait anxiety on social-emotional problem,  
12 social emotional competence, and cognitive development scores. Two, separate four-level  
13 categorical prenatal maternal mental health variables were created to assess the impact of  
14 prenatal maternal depression, trait anxiety, and state anxiety. We created a prenatal maternal  
15 depression and trait anxiety variable with four categories: (1) *No Prenatal Depression or Trait*  
16 *Anxiety* (n=199; 33.17%, Reference Category), (2) *Prenatal Depression Only* (106; 17.67%), (3)  
17 *Prenatal Trait Anxiety Only* (n=68; 11.33%) and (4) *Prenatal Maternal Depression and Trait*  
18 *Anxiety* (n=227; 37.83%) (Table 1). In separate models we additionally examined the  
19 independent and joint effects of prenatal maternal depression and state anxiety. We created a  
20 prenatal maternal depression and state anxiety variable with four categories: (1) *No Prenatal*  
21 *Depression or State Anxiety* (n=248; 41.33%; Reference Category), (2) *Prenatal Depression*  
22 *Only* (n=237; 39.50%), (3) *Prenatal State Anxiety Only* (n=19; 3.17%) and (4) *Prenatal*  
23 *Maternal Depression and State Anxiety* (n=96; 16%) (Table 1). For each regression model, either  
24 *No Prenatal Maternal Depression or Trait Anxiety* or *No Prenatal Maternal Depression and*  
25 *State Anxiety* was set as the reference category. Minimally adjusted models included sex,  
26 gestational age at birth, and age at follow up as covariates. Fully adjusted models additionally  
27 controlled for prenatal maternal alcohol use, prenatal maternal tobacco use, maternal  
28 employment status at delivery, maternal educational attainment at delivery, parity, and the  
29 household crowding index. We used missing indicator methods and median imputation to  
30  
31  
32  
33  
34  
35  
36  
37  
38  
39  
40  
41  
42  
43  
44  
45  
46  
47  
48  
49  
50  
51  
52  
53  
54  
55  
56  
57  
58  
59  
60

account for missing categorical and continuous covariate data, respectively (described in Table 1).

All analyses were performed in SAS software version 9.4 (SAS Institute, Cary NC).

## Results

*Maternal and Child Demographic Characteristics.* The participants included in the present analysis consisted of mothers and their infant born between April 2014 and August 2015 from the Western Cape Province of South Africa who participated in a follow-up study to examine social-emotional development and cognitive development at approximately three years of age. A total of n=18 mother-infant dyads were excluded due to missing maternal prenatal mental health data. The final sample consisted of 600 maternal-infant dyads (274 females; gestational age at birth: 38.89 weeks  $\pm$  2.03) (Table 1).

*Child Social-Emotional Development.* Based on the BITSEA problem scale percentile rank score of 26 or higher, 51% of children (306/600) were classified as having a “possible problem”. Based on the BITSEA competence scale percentile rank score of 15 or lower, 5% (30/600) of children were classified in the “possible deficit/delay range” for social competencies (Table 2). There were no significant sex differences in social-emotional problems on the BITSEA, however girls had significantly higher social-emotional competence compared to boys (mean difference: 0.38, CI: 0.05, 0.71,  $p = 0.03$ )

*Association between Prenatal Maternal Depression, Trait Anxiety, and Child Social-Emotional Development.* Compared to children born to mothers with no prenatal depression or trait anxiety, children born to mothers with prenatal depression and trait anxiety had higher social-emotional problems (mean difference: 4.66; 95% CI 3.43, 5.90), followed by prenatal maternal trait anxiety only (mean difference: 3.87; 95% CI 2.07, 5.66), and finally prenatal maternal depression only (mean difference: 2.76; 95% CI 1.23, 4.29) in minimally adjusted

1  
2  
3 models. These associations remained significant in fully adjusted models where similarly  
4  
5 comorbid prenatal maternal depression and trait anxiety group was associated with the highest  
6  
7 child social-emotional problems (mean difference: 4.33; 95% CI 2.90, 5.67), followed by  
8  
9 prenatal maternal trait anxiety only (mean difference: 3.23; 95% CI 1.19, 5.27), with the smallest  
10  
11 mean difference for prenatal maternal depression only group (mean difference: 2.64; 95% CI  
12  
13 1.02, 4.27) as compared to the no prenatal depression or trait anxiety group (Figure 1).  
14  
15  
16 Additional significant predictors in the multivariate models were parity of 3 or greater which was  
17  
18 associated with lower social-emotional problems (mean difference: -3.02, 95% CI -4.63, -1.40)  
19  
20 and low continuous smoking during pregnancy which was associated with higher social-  
21  
22 emotional problems (mean difference: 1.39, 95% CI 0.039, 2.74). There were no significant  
23  
24 associations between prenatal maternal depression, trait anxiety, and child social-emotional  
25  
26 competence.  
27  
28  
29

30  
31 *Association between Prenatal Maternal Depression, State Anxiety, and Child Social-*  
32  
33 *Emotional Development.* Compared to children born to mothers with no prenatal depression or  
34  
35 state anxiety, children born to mothers with comorbid prenatal depression and state anxiety had  
36  
37 higher social-emotional problems (mean difference: 4.29; 95% CI 2.73, 5.84). Children born to  
38  
39 mothers with prenatal depression only also had higher social-emotional problems compared to  
40  
41 mothers with no prenatal depression or state anxiety (mean difference: 2.71; 95% CI 1.51, 3.88).  
42  
43 These associations remained significant in fully adjusted models (prenatal depression and state  
44  
45 anxiety: 3.90 mean increase (95% CI 2.19, 5.60); prenatal depression only: 2.58 mean increase  
46  
47 (95% CI 1.34, 3.82)) (Figure 1). Additional significant predictors in the multivariate models  
48  
49 were parity of 3 or greater which was associated with lower social-emotional problems (mean  
50  
51 difference: -3.22, 95% CI -4.86, -1.58), low continuous smoking during pregnancy which was  
52  
53  
54  
55  
56  
57  
58  
59  
60

1  
2  
3 associated with higher social-emotional problems (mean difference: 1.44; 95% CI 0.075, 2.81),  
4  
5 and finally less than a high school education (some primary school only) which was associated  
6  
7 with higher social-emotional problems (mean difference: 3.47; 95% CI 0.248, 6.70). However,  
8  
9 there was no significant association between prenatal state anxiety only and child social-  
10  
11 emotional problems on the BITSEA. There were also no significant associations between  
12  
13 prenatal maternal depression, state anxiety, and social-emotional competence.  
14  
15

16  
17 *Child Cognitive, Language, and Motor Development.* Based on normative cognitive  
18  
19 cutoff scores defined by the BSID-III ST, 4% of children (24/600) were classified as at-risk  
20  
21 (Table 2). Risk classification percentages were similar across all subdomains, expressive  
22  
23 language: 4% , receptive language: 6%, gross motor: 4%, and fine motor: 3%. There were no  
24  
25 significant sex differences in child cognitive scores.  
26  
27

28  
29 *Association between Prenatal Maternal Depression, Trait Anxiety, and Child Cognitive,*  
30  
31 *Language, and Motor Development.* Compared to children born to mothers with no prenatal  
32  
33 depression or trait anxiety, children born to mothers with comorbid prenatal depression and trait  
34  
35 anxiety had lower cognitive scores on the BSID-III ST (mean difference: -1.04; 95% CI -1.99, -  
36  
37 0.08). Results remained significant in the fully adjusted model (mean difference: -1.11; 95% CI -  
38  
39 2.13, -0.09) (Figure 2) and in posthoc analyses where we additionally controlled for language of  
40  
41 administration for the BSID-III ST (mean difference: -0.51, 95% CI -0.99, -0.042). Children who  
42  
43 were assessed on the BSID-III ST in Afrikaans (mean difference: -1.00, 95% CI -1.48, -0.52) or  
44  
45 who were assessed in mixed English and Afrikaans (mean difference: -1.30, 95% CI -2.07, -  
46  
47 0.54) has significantly lower cognitive scores compared to children assessed in English. Low  
48  
49 continuous prenatal maternal alcohol use was also associated with lower cognitive scores (mean  
50  
51 difference: -1.30; 95% CI -2.36, -0.24).  
52  
53  
54  
55  
56  
57  
58  
59  
60

1  
2  
3 *Association between Prenatal Maternal Depression, State Anxiety, and Child Cognitive,*  
4 *Language, and Motor Development.* Compared to children born to mothers with neither prenatal  
5 depression nor trait anxiety, there was no significant association between cognitive scores for  
6 children born to mothers with prenatal depression only, prenatal trait anxiety only, or combined  
7 prenatal depression and trait anxiety in either the minimally or fully adjusted models.  
8  
9  
10  
11  
12  
13  
14  
15  
16

## 17 **Discussion**

18  
19 In summary, we found the greatest increase in child social-emotional problems in  
20 children born to women with comorbid prenatal depression and trait anxiety compared to women  
21 with no prenatal depression or trait anxiety, prenatal depression alone, or prenatal trait anxiety  
22 alone. We additionally found a significant association between comorbid prenatal maternal  
23 depression and state anxiety on higher child social-emotional problems; however, we found no  
24 association between prenatal maternal state anxiety in the absence of prenatal maternal  
25 depression on child social-emotional problems. Finally, we reported children born to mothers  
26 with prenatal maternal depression and trait anxiety had lower cognitive scores on the BSID-III  
27 ST, but we did not find an association between prenatal maternal depression alone on cognitive  
28 outcomes at 3-years of age.  
29  
30  
31  
32  
33  
34  
35  
36  
37  
38  
39  
40  
41

42 Our finding linking prenatal maternal depression and anxiety to social-emotional risk  
43 parallels two recent South African studies linking increased prenatal maternal stressors to higher  
44 behavioral problems in children with an odds ratio of 2.52, but not before 4 years of age<sup>29</sup> and  
45 increased perinatal depression to aggressive behaviors at 60 months of age<sup>24</sup>. Our findings are  
46 also largely consistent with a recent meta-analysis of studies predominately conducted in HICs,  
47 which found prenatal maternal depression and anxiety were associated with higher social-  
48  
49  
50  
51  
52  
53  
54  
55  
56  
57  
58  
59  
60

1  
2  
3 emotional problems in offspring with larger effect sizes for prenatal maternal depression (OR  
4 1.79; 95% CI 1.61 - 1.99) compared to prenatal maternal anxiety (OR 1.50, 95% CI, 1.36 -  
5 1.64)<sup>6</sup>. We found the greatest increase in child social-emotional problems in children born to  
6 women with comorbid prenatal depression and trait anxiety and no effect of prenatal maternal  
7 state anxiety in the absence of prenatal maternal depression on child social-emotional problems.  
8  
9 Our results are suggestive that chronic anxiety measured via trait anxiety may be more predictive  
10 of child social-emotional outcomes than a single measurement of concurrent anxiety during  
11 pregnancy.  
12  
13  
14  
15  
16  
17  
18  
19  
20

21 A prior meta-analysis<sup>6</sup> also found stronger effects of prenatal maternal depression and  
22 anxiety on child social-emotional outcomes when sociodemographic risk factors such as low-  
23 income, lower levels of parental education, or single family households, were highest<sup>6</sup>. Similarly,  
24 we found that lower levels of maternal education, low continuous tobacco use during pregnancy,  
25 and low continuous alcohol use during pregnancy were associated with higher social-emotional  
26 problems in children at three years of age. Intriguingly, maternal parity of 3 or greater was  
27 protective and associated with lower social-emotional problems which may be due to reduced  
28 depression and anxiety levels in women with higher parity, changes in the perception of their  
29 child's behavior due to having multiple children, or additional social opportunities during sibling  
30 interactions<sup>44 45</sup>.  
31  
32  
33  
34  
35  
36  
37  
38  
39  
40  
41  
42  
43

44 The Drakenstein Child Health Study based in the Western Cape found approximately  
45 50% of the overall sample (369/731) were categorized as having cognitive delay at two years of  
46 age based on cutoffs defined by United States (US) normative data<sup>30</sup>. Better cognitive outcomes  
47 were associated with higher maternal education, older child age, a primigravid mother, and  
48 higher socioeconomic status whereas prenatal maternal depression was associated with a 1.03  
49  
50  
51  
52  
53  
54  
55  
56  
57  
58  
59  
60

1  
2  
3 SD (95% CI -1.94 to -0.12) reduction in cognitive scores on the Bayley Scales of Infant and  
4 Toddler Development at two years of age<sup>30</sup>. Similar to the Drakenstein Child Health Study<sup>30</sup>, we  
5 found children born to mothers with prenatal maternal depression and trait anxiety had lower  
6 cognitive scores on the BSID-III ST compared to the no prenatal maternal depression or trait  
7 anxiety group. In contrast, we did not find an association between prenatal maternal depression  
8 alone on cognitive outcomes at 3-years of age. However, since we did not utilize the full BSID-  
9 III and only administered the BSID-III ST, it is difficult to directly compare our results to The  
10 Drakenstein Child Health study findings. Moreover, both studies relied on US normative data to  
11 define cutoff scores.  
12  
13  
14  
15  
16  
17  
18  
19  
20  
21  
22  
23

24 More recently, a large home-visiting intervention study based in Cape Town examined  
25 the effect of prenatal maternal depression only, postnatal maternal depression only (birth – 60  
26 months), or recurrent pre- and postnatal maternal depression. This study also accounted for  
27 several other risk factors including intimate partner violence, HIV status, and alcohol use on  
28 child social behaviors, language skills, and cognitive development. No associations were found  
29 between maternal depression at any time point with children's language or cognitive  
30 development at 36 or 60 months of age<sup>24</sup>. However, children of never depressed mothers had  
31 lower aggressive behaviors on the Child Behavior Checklist at 60 months of age than children of  
32 mothers with postnatal depression only or perinatal depression<sup>24</sup>.  
33  
34  
35  
36  
37  
38  
39  
40  
41  
42  
43

44 There are several biological mechanisms which can explain prior studies and our current  
45 findings linking prenatal maternal depression and anxiety with child social-emotional behaviors  
46 and cognitive development such as increased prenatal maternal inflammation, increased cortisol  
47 production, and/or epigenetic changes<sup>46-55</sup>. Pregnancy is associated with changes in inflammatory  
48 processes and increased placental cortisol production with reduced maternal HPA axis sensitivity  
49  
50  
51  
52  
53  
54  
55  
56  
57  
58  
59  
60



1  
2  
3 to stress<sup>46,47</sup>. However, prenatal maternal depression may upregulate inflammatory processes  
4 and/or cortisol production. Additionally, prior research found women with comorbid depression  
5 and anxiety have the greatest increases in salivary cortisol levels<sup>18</sup>. Maternal cortisol can cross  
6 the placenta resulting in increased inflammation<sup>46,47</sup> and/or affect the developmental of limbic  
7 regions, which are associated with social and emotional processes<sup>56</sup>. In animal models, increased  
8 proinflammatory proteins have been associated with widespread changes in perinatal brain  
9 development such as with volume reductions in gray and white matter, decreased density of  
10 GABAergic neurons, reduced synaptic pruning, and network dysfunction with potential  
11 downstream effects on neurobehavioral development<sup>48-55</sup>. Other studies examining the  
12 intergenerational transmission of trauma have demonstrated transgenerational epigenetic changes  
13 in animal models<sup>57</sup>. Taken together, prior research suggests multiple overlapping pathways by  
14 which prenatal maternal mood can affect offspring brain-behavioral development.

15  
16  
17 While we report an association of prenatal maternal depression and anxiety with child  
18 social-emotional and cognitive development from a prospective cohort study with a fairly large  
19 sample of participants, there are several methodological and contextual limitations within the  
20 current study that are worth noting. First, it is important to note that the reliance on maternal-  
21 report measures to characterize child social-emotional development is a limitation in the majority  
22 of research to date, including the present study. The reliance on maternal reporting of child  
23 social-emotional development may be influenced by factors such as maternal mood or education.  
24 An additional limitation was the use of the BSID-III screening test in the current study to  
25 measure cognitive development, which is based on US normative data. Future studies should  
26 consider objective measures of child social-emotional development through observational or  
27  
28  
29  
30  
31  
32  
33  
34  
35  
36  
37  
38  
39  
40  
41  
42  
43  
44  
45  
46  
47  
48  
49  
50  
51  
52  
53  
54  
55  
56  
57  
58  
59  
60

1  
2  
3 behavioral coding paradigms in addition to utilizing objective cognitive developmental  
4  
5 assessments of with normative data in South African children.  
6

7  
8         There are also several unmeasured contextual factors which could affect our findings. For  
9  
10 example, although prenatal maternal and child nutrition are known to affect child  
11  
12 neurobehavioral development, we lacked measures of prenatal maternal nutrition, prenatal  
13  
14 maternal micronutrient deficiencies, prenatal and postnatal household food insecurity, and  
15  
16 information regarding child nutrition. Additionally, prior studies have emphasized the  
17  
18 importance of measuring childhood trauma, maternal stress, and social support within  
19  
20 communities with several heterogeneous risk factors<sup>3</sup>, these measures were not collected as part  
21  
22 of the original NIH Safe Passage Study or our recent follow-up study. Therefore, we could not  
23  
24 examine their effects or consider maternal social support as a potential moderator of resilient  
25  
26 neurodevelopmental outcomes. There is also robust literature examining both postpartum  
27  
28 depression (PPD) and the early mother-infant relation in shaping child outcomes. Two prior  
29  
30 studies in South Africa demonstrated maternal intrusiveness and coerciveness mediated the  
31  
32 association between maternal PPD and early childhood attachment<sup>58 59</sup>. In the current study, we  
33  
34 did not collect data postnatally between birth and three years of age. Additionally, we did not  
35  
36 collect postnatal information on maternal depression, anxiety, or stress. Therefore, due to this  
37  
38 methodological limitation we cannot draw conclusions regarding the combined effect of the pre-  
39  
40 and postnatal environment on child neurodevelopmental outcomes, nor can we assess potential  
41  
42 interaction effects between pre- and postnatal maternal mood on child social-emotional and  
43  
44 cognitive outcomes. Finally, our results may not generalize to all South African populations  
45  
46 where HIV rates can be as high as 35% since our cohort only included one woman with HIV.  
47  
48  
49  
50  
51  
52  
53  
54  
55  
56  
57  
58  
59  
60  
Strengths of the current analyses include our large sample size, evaluation of both cognitive and

1  
2  
3 social-emotional outcomes within the same cohort, finally the detailed prospective collection of  
4 both depression and anxiety symptoms during pregnancy<sup>31</sup> in addition to other potential  
5  
6 confounders.  
7  
8

9  
10 Our results suggest comorbid prenatal maternal depression and chronic anxiety have a  
11 greater impact on child social-emotional and cognitive development than either condition alone  
12 or than comorbid prenatal maternal depression and transitory anxiety during pregnancy. These  
13 findings are supported by a robust literature within the DOHaD framework linking perturbations  
14 in the gestational environment to later neurodevelopmental or psychiatric sequelae. Our results  
15 also lend support for future intervention studies aimed at perinatal mental health interventions  
16 targeting maternal depressive and anxiety symptoms to improve long-term child social-emotional  
17 and cognitive developmental outcomes in low-resource communities.  
18  
19  
20  
21  
22  
23  
24  
25  
26  
27  
28  
29  
30  
31  
32  
33  
34  
35  
36  
37  
38  
39  
40  
41  
42  
43  
44  
45  
46  
47  
48  
49  
50  
51  
52  
53  
54  
55  
56  
57  
58  
59  
60

| <b>Table 1 - Sociodemographic characteristics</b>        |                                  |                           |
|----------------------------------------------------------|----------------------------------|---------------------------|
|                                                          | Mean $\pm$ SD or N (%)           | N and Percent Missing (%) |
| <b>Maternal Characteristics</b>                          |                                  |                           |
| Maternal Age (years)                                     | 25.26 $\pm$ 5.91                 | 0 (0%)                    |
| Maternal Body Mass Index (BMI)                           |                                  | 0 (0%)                    |
|                                                          | BMI <18.5 (kg/m <sup>2</sup> )   | 62 (10.33%)               |
|                                                          | BMI 18.5-25 (kg/m <sup>2</sup> ) | 282 (47%)                 |
|                                                          | BMI 25-30 (kg/m <sup>2</sup> )   | 132 (22%)                 |
|                                                          | BMI >30 (kg/m <sup>2</sup> )     | 124 (20.67%)              |
| Parity                                                   |                                  | 0 (0%)                    |
|                                                          | Parity <1                        | 218 (36.33%)              |
|                                                          | Parity =1                        | 196 (32.67%)              |
|                                                          | Parity =2                        | 103 (17.17%)              |
|                                                          | Parity $\geq$ 3                  | 83 (13.83%)               |
| Antenatal care visits                                    |                                  | 0 (0%)                    |
|                                                          | antenatal care visit <3          | 49 (8.17%)                |
|                                                          | antenatal care visit 3-6         | 389 (64.83%)              |
|                                                          | antenatal care visit >6          | 162 (27%)                 |
| Cesarean Section                                         | 106 (17.70%)                     | 1 (0.1%)                  |
| Education                                                |                                  | 0 (0%)                    |
|                                                          | Some primary school              | 43 (7.167%)               |
|                                                          | Some high school                 | 405 (67.57%)              |
|                                                          | Completed high school            | 119 (19.83%)              |
|                                                          | Beyond high school               | 33 (5.5%)                 |
| Married                                                  | 290 (48.33%)                     | 0 (0%)                    |
| Employed                                                 | 172 (28.67%)                     | 0 (0%)                    |
| Adjusted Household Crowding                              | 1.56 $\pm$ 0.72                  | 2 (0.33%)                 |
| Depression (Edinburgh $\geq$ 13)                         | 333 (55%)                        | 0 (0%)                    |
| Anxiety (State-Trait Anxiety Inventory $\geq$ 40)        | 115 (19.17%)                     | 0 (0%)                    |
| Maternal Prenatal Alcohol Use Cluster Groups             |                                  | 0 (0%)                    |
| Non drinking group: 0 standard drinks/trimester          | 245 (46.93%)                     |                           |
| Moderate-high continuous drinking group:                 | 122 (23.37%)                     |                           |
|                                                          | Standard drinks in Trimester 1   | 27 $\pm$ 39               |
|                                                          | Standard drinks in Trimester 2   | 17 $\pm$ 25               |
|                                                          | Standard drinks in Trimester 3   | 9.4 $\pm$ 15              |
| Binge drinking events ( $\geq$ 4 drinks/day) Trimester 1 | 2.7 $\pm$ 4                      |                           |

|                                                          |                   |           |
|----------------------------------------------------------|-------------------|-----------|
| Binge drinking events ( $\geq 4$ drinks/day) Trimester 2 | 1.7 $\pm$ 2.8     |           |
| Binge drinking events ( $\geq 4$ drinks/day) Trimester 3 | 0.89 $\pm$ 1.7    |           |
| Low continuous drinking                                  | 26 (4.98%)        |           |
| Standard drinks in Trimester 1                           | 1.4 $\pm$ 2.5     |           |
| Standard drinks in Trimester 2                           | 4 $\pm$ 2.8       |           |
| Standard drinks in Trimester 3                           | 0.62 $\pm$ 1.1    |           |
| Binge drinking events ( $\geq 4$ drinks/day) Trimester 1 | 0.067 $\pm$ 0.25  |           |
| Binge drinking events ( $\geq 4$ drinks/day) Trimester 2 | 0.30 $\pm$ 0.46   |           |
| Binge drinking events ( $\geq 4$ drinks/day) Trimester 3 | 0 $\pm$ 0         |           |
| Quit early drinking                                      | 129 (24.71%)      |           |
| Standard drinks in Trimester 1                           | 8.5 $\pm$ 6.5     |           |
| Standard drinks in Trimester 2                           | 0.31 $\pm$ 0.87   |           |
| Standard drinks in Trimester 3                           | 0.056 $\pm$ 0.31  |           |
| Binge drinking events ( $\geq 4$ drinks/day) Trimester 1 | 0.84 $\pm$ 0.82   |           |
| Binge drinking events ( $\geq 4$ drinks/day) Trimester 2 | 0 $\pm$ 0         |           |
| Binge drinking events ( $\geq 4$ drinks/day) Trimester 3 | 0 $\pm$ 0         |           |
| Maternal Prenatal Tobacco Use                            |                   | 2 (0.33%) |
| Non smoking (0 cigarettes/trimester)                     | 227 (37.97%)      |           |
| Moderate-high continuous smoking                         | 132 (22.07%)      |           |
| Average Cigarettes in Trimester 1                        | 45 $\pm$ 20       |           |
| Average Cigarettes in Trimester 2                        | 50 $\pm$ 27       |           |
| Average Cigarettes in Trimester 3                        | 48 $\pm$ 25       |           |
| Low continuous smoking                                   | 222 (37.12%)      |           |
| Average Cigarettes in Trimester 1                        | 16 $\pm$ 9.4      |           |
| Average Cigarettes in Trimester 2                        | 16 $\pm$ 9.7      |           |
| Average Cigarettes in Trimester 3                        | 16 $\pm$ 10       |           |
| Quit early smoking                                       | 17 (2.84%)        |           |
| Average Cigarettes in Trimester 1                        | 11 $\pm$ 7.5      |           |
| Average Cigarettes in Trimester 2                        | 0.15 $\pm$ 0.32   |           |
| Average Cigarettes in Trimester 3                        | 0.079 $\pm$ 0.11  |           |
| Raw Maternal Edinburgh Score                             | 12.99 $\pm$ 5.73  | 0 (0%)    |
| Raw Maternal State Anxiety Score                         | 31.23 $\pm$ 10.24 | 0 (0%)    |
| Raw Maternal Trait Anxiety Score                         | 40.63 $\pm$ 10.63 | 0 (0%)    |
| Depression - Trait Anxiety Groups                        |                   | 0 (0%)    |
| No depression or trait anxiety                           | 199 (33.17%)      |           |
| Depression alone                                         | 106 (17.67%)      |           |
| Trait anxiety alone                                      | 68 (11.33%)       |           |
| Depression and trait anxiety                             | 227 (37.83%)      |           |
| Depression - State Anxiety Groups                        |                   | 0 (0%)    |
| No depression or state anxiety                           | 248 (41.33%)      |           |

|                                  |                              |                  |           |
|----------------------------------|------------------------------|------------------|-----------|
| HIV status                       | Depression alone             | 237 (39.50%)     |           |
|                                  | State anxiety alone          | 19 (3.17%)       |           |
|                                  | Depression and state anxiety | 96 (16%)         |           |
|                                  | Tested for HIV               | 600 (100%)       |           |
|                                  | HIV positive                 | 1 (0.1%)         |           |
| <b>Infant Characteristics</b>    |                              |                  |           |
| Infant Sex                       |                              |                  | 0 (0%)    |
|                                  | Male                         | 326 (54.33%)     |           |
|                                  | Female                       | 274 (45.67%)     |           |
| Gestational age at birth (weeks) |                              | 38.89 ± 2.03     | 0 (0%)    |
| Infant Birth weight (grams)      |                              | 2980.65 ± 564.65 | 2 (0.33%) |
| Follow-up age (months)           |                              | 38.29 ± 2.96     | 0 (0%)    |
| Adjusted follow-up age (months)  |                              | 38.14 ± 0.016    | 0 (0%)    |

**Table 2. Neurodevelopmental Outcome Raw Scores and At-risk Groups**

|                                                           |                             |              |  |
|-----------------------------------------------------------|-----------------------------|--------------|--|
| BSID-III Screening Test Language of Administration        |                             |              |  |
|                                                           | English Only                | 177 (30%)    |  |
|                                                           | Afrikaans Only              | 360 (62%)    |  |
|                                                           | Mixed English and Afrikaans | 48 (8%)      |  |
| BSID-III Screening Test Scores                            |                             |              |  |
|                                                           | Gross motor                 | 25.47 ± 4.54 |  |
|                                                           | Fine motor                  | 23.55 ± 4.08 |  |
|                                                           | Cognitive                   | 27.77 ± 4.99 |  |
|                                                           | Problem solving             | 13.40 ± 6.77 |  |
|                                                           | Receptive language          | 21.69 ± 5.10 |  |
|                                                           | Expressive language         | 21.27 ± 3.78 |  |
| At-Risk Categories                                        |                             |              |  |
|                                                           | Gross motor                 | 21 (4%)      |  |
|                                                           | Fine motor                  | 18 (3%)      |  |
|                                                           | Cognitive                   | 24 (4%)      |  |
|                                                           | Receptive language          | 33 (6%)      |  |
|                                                           | Expressive language         | 25 (4%)      |  |
| Brief Infant Toddler Social-Emotional Assessment (BITSEA) |                             |              |  |
|                                                           | Social Emotional Problem    | 13.40 ± 6.77 |  |
|                                                           | Competence                  | 19.56 ± 2.07 |  |
| At-Risk Categories                                        |                             |              |  |
|                                                           | Social Emotional Problems   | 306 (51%)    |  |

|                             |         |
|-----------------------------|---------|
| Social-Emotional Competence | 30 (5%) |
|-----------------------------|---------|

## Figure Legends

**Figure 1.** Association between prenatal maternal depression, prenatal maternal anxiety, and child social-emotional problems measured by the BITSEA. Each line plot depicts the mean difference and their confidence interval for child social-emotional problems (x-axis) for each prenatal maternal mental health group (y-axis). Either no prenatal maternal depression and state anxiety or no prenatal maternal depression and trait anxiety were the reference groups. Models were adjusted for sex, gestational age at birth, age at follow-up, prenatal maternal alcohol use, prenatal maternal tobacco use, maternal employment status at delivery, maternal educational attainment at delivery, parity, and the household crowding index.

**Figure 2.** Association between prenatal maternal depression, prenatal maternal anxiety, and child cognitive development measured by the BSID-III Screening Test. Each line plot depicts the mean difference and their confidence interval for child cognitive development (x-axis) for each prenatal maternal mental health group (y-axis). Either no prenatal maternal depression and state anxiety or no prenatal maternal depression and trait anxiety were the reference groups. Models were adjusted for sex, gestational age at birth, age at follow-up, prenatal maternal alcohol use, prenatal maternal tobacco use, maternal employment status at delivery, maternal educational attainment at delivery, parity, and the household crowding index.

## References

- O'Donnell KJ, Meaney MJ. Fetal Origins of Mental Health: The Developmental Origins of Health and Disease Hypothesis. *Am J Psychiatry* 2017;174(4):319-28. doi: 10.1176/appi.ajp.2016.16020138 [published Online First: 2016/11/15]
- Hofer MA. *The Roots of Human Behavior: An Introduction to the Psychobiology of Early Development*. San Francisco, CA: W. H. Freeman & Company 1981.
- Stein DJ, Koen N, Donald KA, et al. Investigating the psychosocial determinants of child health in Africa: The Drakenstein Child Health Study. *J Neurosci Methods* 2015;252:27-35. doi: 10.1016/j.jneumeth.2015.03.016 [published Online First: 2015/03/24]
- Herba CM, Glover V, Ramchandani PG, et al. Maternal depression and mental health in early childhood: an examination of underlying mechanisms in low-income and middle-income countries. *Lancet Psychiatry* 2016;3(10):983-92. doi: 10.1016/S2215-0366(16)30148-1 [published Online First: 2016/09/22]
- Monk C, Lugo-Candelas C, Trumpff C. Prenatal Developmental Origins of Future Psychopathology: Mechanisms and Pathways. *Annu Rev Clin Psychol* 2019;15:317-44. doi: 10.1146/annurev-clinpsy-050718-095539 [published Online First: 2019/02/24]

- 1  
2  
3 6. Madigan S, Oatley H, Racine N, et al. A Meta-Analysis of Maternal Prenatal Depression and  
4 Anxiety on Child Socioemotional Development. *J Am Acad Child Adolesc Psychiatry*  
5 2018;57(9):645-57 e8. doi: 10.1016/j.jaac.2018.06.012
- 6  
7 7. King S, Laplante DP. The effects of prenatal maternal stress on children's cognitive  
8 development: Project Ice Storm. *Stress* 2005;8(1):35-45. doi:  
9 10.1080/10253890500108391
- 10  
11 8. Huizink AC, Robles de Medina PG, Mulder EJ, et al. Stress during pregnancy is associated  
12 with developmental outcome in infancy. *J Child Psychol Psychiatry* 2003;44(6):810-8.  
13 doi: 10.1111/1469-7610.00166 [published Online First: 2003/09/10]
- 14  
15 9. Leis JA, Heron J, Stuart EA, et al. Associations between maternal mental health and child  
16 emotional and behavioral problems: does prenatal mental health matter? *J Abnorm Child*  
17 *Psychol* 2014;42(1):161-71. doi: 10.1007/s10802-013-9766-4
- 18  
19 10. O'Connor TG, Heron J, Golding J, et al. Maternal antenatal anxiety and children's  
20 behavioural/emotional problems at 4 years. Report from the Avon Longitudinal Study of  
21 Parents and Children. *Br J Psychiatry* 2002;180:502-8.
- 22  
23 11. O'Donnell KJ, Glover V, Barker ED, et al. The persisting effect of maternal mood in  
24 pregnancy on childhood psychopathology. *Dev Psychopathol* 2014;26(2):393-403. doi:  
25 10.1017/S0954579414000029
- 26  
27 12. Loomans EM, van der Stelt O, van Eijsden M, et al. Antenatal maternal anxiety is associated  
28 with problem behaviour at age five. *Early Hum Dev* 2011;87(8):565-70. doi:  
29 10.1016/j.earlhumdev.2011.04.014
- 30  
31 13. Rice F, Harold GT, Boivin J, et al. The links between prenatal stress and offspring  
32 development and psychopathology: disentangling environmental and inherited influences.  
33 *Psychol Med* 2010;40(2):335-45. doi: 10.1017/S0033291709005911
- 34  
35 14. Ronald A, Pennell CE, Whitehouse AJ. Prenatal Maternal Stress Associated with ADHD and  
36 Autistic Traits in early Childhood. *Front Psychol* 2010;1:223. doi:  
37 10.3389/fpsyg.2010.00223 [published Online First: 2010/01/01]
- 38  
39 15. Lereya ST, Wolke D. Prenatal family adversity and maternal mental health and vulnerability  
40 to peer victimisation at school. *J Child Psychol Psychiatry* 2013;54(6):644-52. doi:  
41 10.1111/jcpp.12012
- 42  
43 16. Rogers A, Obst S, Teague SJ, et al. Association Between Maternal Perinatal Depression and  
44 Anxiety and Child and Adolescent Development: A Meta-analysis. *JAMA Pediatr*  
45 2020;174(11):1082-92. doi: 10.1001/jamapediatrics.2020.2910 [published Online First:  
46 2020/09/15]
- 47  
48 17. Van den Bergh BRH, van den Heuvel MI, Lahti M, et al. Prenatal developmental origins of  
49 behavior and mental health: The influence of maternal stress in pregnancy. *Neurosci*  
50 *Biobehav Rev* 2017 doi: 10.1016/j.neubiorev.2017.07.003 [published Online First:  
51 2017/08/02]
- 52  
53 18. Evans LM, Myers MM, Monk C. Pregnant women's cortisol is elevated with anxiety and  
54 depression - but only when comorbid. *Arch Womens Ment Health* 2008;11(3):239-48.  
55 doi: 10.1007/s00737-008-0019-4 [published Online First: 2008/05/22]
- 56  
57 19. Leff Gelman P, Mancilla-Herrera I, Flores-Ramos M, et al. The cytokine profile of women  
58 with severe anxiety and depression during pregnancy. *BMC Psychiatry* 2019;19(1):104.  
59 doi: 10.1186/s12888-019-2087-6 [published Online First: 2019/04/05]
- 60  
61 20. Osborne LM, Yenokyan G, Fei K, et al. Innate immune activation and depressive and  
62 anxious symptoms across the peripartum: An exploratory study.



- 1  
2  
3 *Psychoneuroendocrinology* 2019;99:80-86. doi: 10.1016/j.psyneuen.2018.08.038  
4 [published Online First: 2018/09/09]  
5  
6 21. Osborne LM, Brar A, Klein SL. The role of Th17 cells in the pathophysiology of pregnancy  
7 and perinatal mood and anxiety disorders. *Brain Behav Immun* 2019;76:7-16. doi:  
8 10.1016/j.bbi.2018.11.015 [published Online First: 2018/11/23]  
9  
10 22. Eshetu EB, Woldesenbet SA. Are there particular social determinants of health for the  
11 world's poorest countries? *African Health Sciences* 2011;11(1):108 - 15.  
12  
13 23. Davies T, Rahman A, Lund C. Psychotherapy for perinatal mental disorders in low- and  
14 middle-income countries. In *Global Mental Health in Practice, Global Mental Health and*  
15 *Psychotherapy: Academic Press, 2019:301 - 19.*  
16  
17 24. Gordon S, Rotheram-Fuller E, Rezvan P, et al. Maternal depressed mood and child  
18 development over the first five years of life in South Africa. *J Affect Disord*  
19 2021;294:346-56. doi: 10.1016/j.jad.2021.07.027 [published Online First: 2021/07/28]  
20  
21 25. Heyningen TV, Myer L, Onah M, et al. Antenatal depression and adversity in urban South  
22 Africa. *J Affect Disord* 2016;203:121-29. doi: 10.1016/j.jad.2016.05.052 [published  
23 Online First: 2016/06/11]  
24  
25 26. Redinger S, Norris SA, Pearson RM, et al. First trimester antenatal depression and anxiety:  
26 prevalence and associated factors in an urban population in Soweto, South Africa. *J Dev*  
27 *Orig Health Dis* 2018;9(1):30-40. doi: 10.1017/S204017441700071X [published Online  
28 First: 2017/09/08]  
29  
30 27. Redinger S, Pearson RM, Houle B, et al. Antenatal depression and anxiety across pregnancy  
31 in urban South Africa. *J Affect Disord* 2020;277:296-305. doi: 10.1016/j.jad.2020.08.010  
32 [published Online First: 2020/08/29]  
33  
34 28. Drysdale RE, Slemming W, Makusha T, et al. Father involvement, maternal depression and  
35 child nutritional outcomes in Soweto, South Africa. *Matern Child Nutr* 2021;17 Suppl  
36 1:e13177. doi: 10.1111/mcn.13177 [published Online First: 2021/07/10]  
37  
38 29. Ramchandani PG, Richter LM, Norris SA, et al. Maternal prenatal stress and later child  
39 behavioral problems in an urban South African setting. *J Am Acad Child Adolesc*  
40 *Psychiatry* 2010;49(3):239-47. [published Online First: 2010/04/23]  
41  
42 30. Donald KA, Wedderburn CJ, Barnett W, et al. Risk and protective factors for child  
43 development: An observational South African birth cohort. *PLoS Med*  
44 2019;16(9):e1002920. doi: 10.1371/journal.pmed.1002920 [published Online First:  
45 2019/09/29]  
46  
47 31. Dukes KA, Burd L, Elliott AJ, et al. The Safe Passage Study: Design, Methods, Recruitment,  
48 and Follow-Up Approach. *Paediatr Perinat Ep* 2014;28(5):455-65. doi:  
49 10.1111/ppe.12136  
50  
51 32. Dukes K, Tripp T, Petersen J, et al. A modified Timeline Followback assessment to capture  
52 alcohol exposure in pregnant women: Application in the Safe Passage Study. *Alcohol*  
53 2017;62:17-27. doi: 10.1016/j.alcohol.2017.02.174  
54  
55 33. Pini N, Shuffrey, LC., Lucchini, M., Sania, A., Nelson, ME., Odendaal, HJ., Fifer, WP.,  
56 Myers, MM., Elliott, AJ. Characterization of Alcohol Consumption during Pregnancy in  
57 the Safe Passage Study. *Conf Proc IEEE Eng Med Biol Soc. Berlin, Germany.*  
58  
59 34. Shuffrey LC, Myers MM, Isler JR, et al. Association Between Prenatal Exposure to Alcohol  
60 and Tobacco and Neonatal Brain Activity: Results From the Safe Passage Study. *JAMA*  
*Netw Open* 2020;3(5):e204714. doi: 10.1001/jamanetworkopen.2020.4714 [published  
Online First: 2020/05/13]

- 1  
2  
3 35. Lawrie TA, Hofmeyr GJ, de Jager M, et al. Validation of the Edinburgh Postnatal Depression  
4 Scale on a cohort of South African women. *S Afr Med J* 1998;88(10):1340-4. [published  
5 Online First: 1998/11/10]  
6  
7 36. Alvarado R, Jadresic E, Guajardo V, et al. First validation of a Spanish-translated version of  
8 the Edinburgh postnatal depression scale (EPDS) for use in pregnant women. A Chilean  
9 study. *Arch Womens Ment Health* 2015;18(4):607-12. doi: 10.1007/s00737-014-0466-z  
10 [published Online First: 2014/10/11]  
11 37. Hartley M, Tomlinson M, Greco E, et al. Depressed mood in pregnancy: prevalence and  
12 correlates in two Cape Town peri-urban settlements. *Reprod Health* 2011;8:9. doi:  
13 10.1186/1742-4755-8-9 [published Online First: 2011/05/04]  
14 38. Spielberger CD. Manual for the State-Trait Anxiety Inventory: STAI. Palo Alto, CA:  
15 Consulting Psychologists Press, 1983.  
16 39. Pretorius TB, Norman AM. Psychometric Data on the Statistics Anxiety Scale for a Sample  
17 of South-African Students. *Educational and Psychological Measurement*  
18 1992;52(4):933-37. doi: Doi 10.1177/0013164492052004015  
19 40. Rademeyer V, Jacklin L. A study to evaluate the performance of black South African urban  
20 infants on the Bayley Scales of Infant Development III. *South African Journal of Child*  
21 *Health* 2013;7(2):54-59.  
22 41. Ballot DE, Ramdin T, Rakotsoane D, et al. Use of the Bayley Scales of Infant and Toddler  
23 Development, Third Edition, to Assess Developmental Outcome in Infants and Young  
24 Children in an Urban Setting in South Africa. *Int Sch Res Notices* 2017;2017:1631760.  
25 doi: 10.1155/2017/1631760 [published Online First: 2017/08/25]  
26 42. Gowan B, Carter MJ, Carter AS. ITSEA/BITSEA: Infant-Toddler and Brief Infant-Toddler  
27 Social and Emotional Assessment. *The Psychological Corporation* 2006  
28 43. Kruizinga I, Visser JC, van Batenburg-Eddes T, et al. Screening for autism spectrum  
29 disorders with the brief infant-toddler social and emotional assessment. *PLoS One*  
30 2014;9(5):e97630. doi: 10.1371/journal.pone.0097630 [published Online First:  
31 2014/05/24]  
32 44. Sang S, Nelson, JA. The effect of siblings on children's social skills and perspective taking.  
33 *Inf Child Dev* 2017;26:e2023.  
34 45. Downey DB CD, Yucel D. Number of Siblings and Social Skills Revisited Among American  
35 Fifth Graders. *Journal of Family Issues* 2015;36(2):273-96. doi:  
36 10.1177/0192513X13507569  
37 46. Ghassabian A, Albert PS, Hornig M, et al. Gestational cytokine concentrations and  
38 neurocognitive development at 7 years. *Transl Psychiat* 2018;8 doi: ARTN 64  
39 10.1038/s41398-018-0112-z  
40 47. Ruiz RJ, Avant KC. Effects of maternal prenatal stress on infant outcomes - A synthesis of  
41 the literature. *Adv Nurs Sci* 2005;28(4):345-55. doi: Doi 10.1097/00012272-200510000-  
42 00006  
43 48. Short SJ, Lubach GR, Karasin AI, et al. Maternal influenza infection during pregnancy  
44 impacts postnatal brain development in the rhesus monkey. *Biol Psychiatry*  
45 2010;67(10):965-73. doi: 10.1016/j.biopsych.2009.11.026 [published Online First:  
46 2010/01/19]  
47 49. Paolicelli RC, Bolasco G, Pagani F, et al. Synaptic pruning by microglia is necessary for  
48 normal brain development. *Science* 2011;333(6048):1456-8. doi:  
49 10.1126/science.1202529 [published Online First: 2011/07/23]  
50  
51  
52  
53  
54  
55  
56  
57  
58  
59  
60

- 1  
2  
3 50. Bergdolt L, Dunaevsky A. Brain changes in a maternal immune activation model of  
4 neurodevelopmental brain disorders. *Prog Neurobiol* 2019;175:1-19. doi:  
5 10.1016/j.pneurobio.2018.12.002 [published Online First: 2018/12/28]  
6  
7 51. Meyer U. Neurodevelopmental Resilience and Susceptibility to Maternal Immune  
8 Activation. *Trends Neurosci* 2019;42(11):793-806. doi: 10.1016/j.tins.2019.08.001  
9 [published Online First: 2019/09/09]  
10  
11 52. Patterson PH. Maternal infection: window on neuroimmune interactions in fetal brain  
12 development and mental illness. *Curr Opin Neurobiol* 2002;12(1):115-8. doi:  
13 10.1016/s0959-4388(02)00299-4 [published Online First: 2002/02/28]  
14  
15 53. Bland ST, Beckley JT, Young S, et al. Enduring consequences of early-life infection on glial  
16 and neural cell genesis within cognitive regions of the brain. *Brain Behav Immun*  
17 2010;24(3):329-38. doi: 10.1016/j.bbi.2009.09.012 [published Online First: 2009/09/29]  
18  
19 54. Money KM, Barke TL, Serezani A, et al. Gestational diabetes exacerbates maternal immune  
20 activation effects in the developing brain. *Mol Psychiatry* 2018;23(9):1920-28. doi:  
21 10.1038/mp.2017.191 [published Online First: 2017/09/28]  
22  
23 55. Bilbo SD, Schwarz JM. Early-life programming of later-life brain and behavior: a critical  
24 role for the immune system. *Front Behav Neurosci* 2009;3:14. doi:  
25 10.3389/neuro.08.014.2009 [published Online First: 2009/09/10]  
26  
27 56. Buss C, Davis EP, Shahbaba B, et al. Maternal cortisol over the course of pregnancy and  
28 subsequent child amygdala and hippocampus volumes and affective problems. *P Natl*  
29 *Acad Sci USA* 2012;109(20):E1312-E19. doi: 10.1073/pnas.1201295109  
30  
31 57. Yehuda R, Lehrner A. Intergenerational transmission of trauma effects: putative role of  
32 epigenetic mechanisms. *World Psychiatry* 2018;17(3):243-57. doi: 10.1002/wps.20568  
33 [published Online First: 2018/09/08]  
34  
35 58. Cooper PJ, Tomlinson M, Swartz L, et al. Post-partum depression and the mother-infant  
36 relationship in a South African peri-urban settlement. *Br J Psychiatry* 1999;175:554-8.  
37 doi: 10.1192/bjp.175.6.554 [published Online First: 2000/05/02]  
38  
39 59. Tomlinson M, Cooper P, Murray L. The mother-infant relationship and infant attachment in a  
40 South African peri-urban settlement. *Child Dev* 2005;76(5):1044-54. doi: 10.1111/j.1467-  
41 8624.2005.00896.x [published Online First: 2005/09/10]  
42  
43  
44  
45  
46  
47  
48

49 **Contributors:** WPF and HJO acquired funding for and designed the work. LCS, AS, NHB, ML,  
50 YR, PES, HJO, and WPF conceptualized the work. MP, PES, CDP, and HJO acquired the data.  
51  
52  
53  
54 LCS, NHB, and WPF led in data collection oversight and quality control. AS, LCS, and YR  
55  
56  
57  
58  
59  
60

1  
2  
3 analyzed the data. All authors contributed to the interpretation of data and drafting the work and  
4  
5 revising it critically for important intellectual content. All authors approved the final manuscript  
6  
7 and agree to be accountable for all aspects of the work.  
8  
9

10  
11  
12 **Acknowledgements:** We would like to acknowledge Lucy Brink, J. David Nugent, and Daianna  
13  
14 Rodriguez for their database and administrative support. We would also like to thank all of the  
15  
16 families who participated in this research study for making this work possible.  
17  
18  
19

## 20 21 **Ethics statements**

### 22 **Patient consent for publication**

23  
24  
25 Not applicable.  
26  
27  
28  
29

### 30 **Ethics approval**

31  
32  
33 Ethics approval was received from the Institutional Review Boards and ethics review committees  
34  
35 at Stellenbosch University (N16-08-101 and N06-10-210) and the New York State Psychiatric  
36  
37 Institute (5338). All participants provided informed written consent at both time points (prenatal  
38  
39 and postnatal) before inclusion in the study.  
40  
41  
42  
43  
44  
45  
46  
47  
48  
49  
50  
51  
52  
53  
54  
55  
56  
57  
58  
59  
60

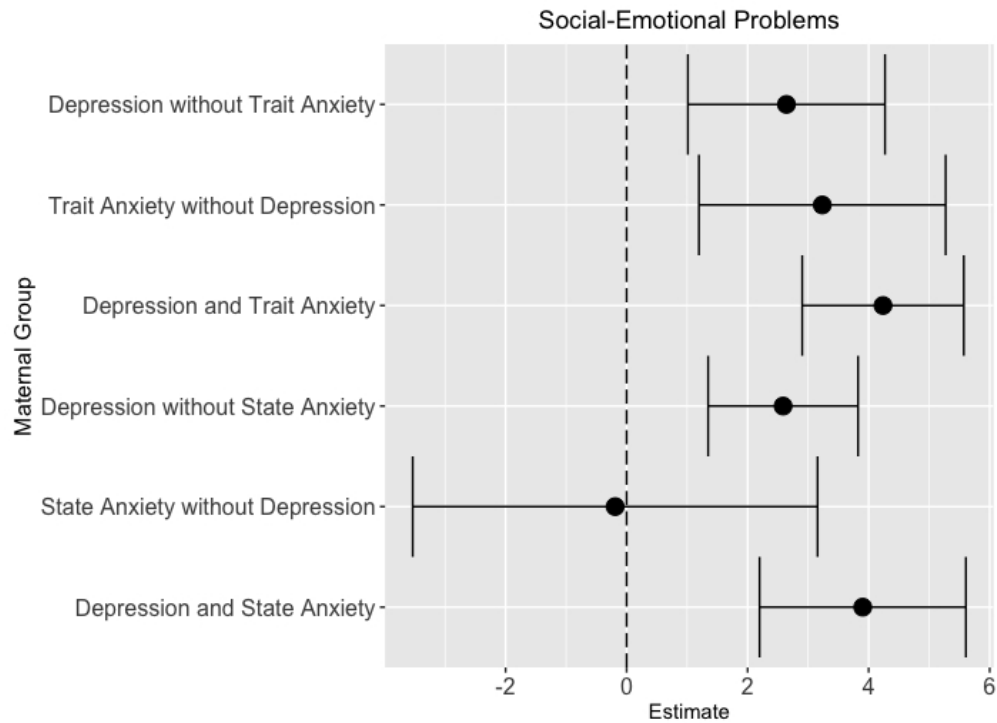

30  
31  
32  
33  
34  
35  
36  
37  
38  
39  
40  
41  
42  
43  
44  
45  
46  
47  
48  
49  
50  
51  
52  
53  
54  
55  
56  
57  
58  
59  
60

Figure 1. Association between prenatal maternal depression, prenatal maternal anxiety, and child social-emotional problems measured by the BITSEA. Each line plot depicts the mean difference and their confidence interval for child social-emotional problems (x-axis) for each prenatal maternal mental health group (y-axis). Either no prenatal maternal depression and state anxiety or no prenatal maternal depression and trait anxiety were the reference groups. Models were adjusted for sex, gestational age at birth, age at follow-up, prenatal maternal alcohol use, prenatal maternal tobacco use, maternal employment status at delivery, maternal educational attainment at delivery, parity, and the household crowding index.

247x181mm (72 x 72 DPI)

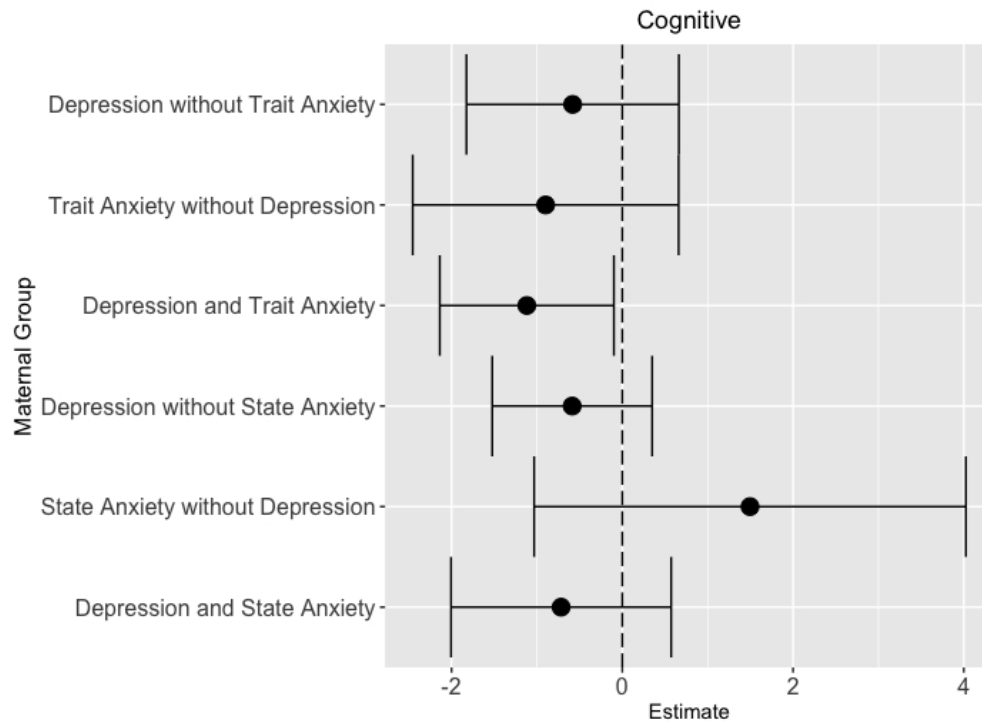

Figure 2. . Association between prenatal maternal depression, prenatal maternal anxiety, and child cognitive development measured by the BSID-III Screening Test. Each line plot depicts the mean difference and their confidence interval for child cognitive development (x-axis) for each prenatal maternal mental health group (y-axis). Either no prenatal maternal depression and state anxiety or no prenatal maternal depression and trait anxiety were the reference groups. Models were adjusted for sex, gestational age at birth, age at follow-up, prenatal maternal alcohol use, prenatal maternal tobacco use, maternal employment status at delivery, maternal educational attainment at delivery, parity, and the household crowding index.

247x181mm (72 x 72 DPI)

STROBE Statement—Checklist of items that should be included in reports of *cohort studies*

|                           | Item No | Recommendation                                                                                                                                                                                                                                                                                                         | Page No                             |
|---------------------------|---------|------------------------------------------------------------------------------------------------------------------------------------------------------------------------------------------------------------------------------------------------------------------------------------------------------------------------|-------------------------------------|
| <b>Title and abstract</b> | 1       | (a) Indicate the study's design with a commonly used term in the title or the abstract<br>(b) Provide in the abstract an informative and balanced summary of what was done and what was found                                                                                                                          | 2<br>3, 4                           |
| <b>Introduction</b>       |         |                                                                                                                                                                                                                                                                                                                        |                                     |
| Background/rationale      | 2       | Explain the scientific background and rationale for the investigation being reported                                                                                                                                                                                                                                   | 5, 6                                |
| Objectives                | 3       | State specific objectives, including any prespecified hypotheses                                                                                                                                                                                                                                                       | 6                                   |
| <b>Methods</b>            |         |                                                                                                                                                                                                                                                                                                                        |                                     |
| Study design              | 4       | Present key elements of study design early in the paper                                                                                                                                                                                                                                                                | 7 - 9                               |
| Setting                   | 5       | Describe the setting, locations, and relevant dates, including periods of recruitment, exposure, follow-up, and data collection                                                                                                                                                                                        | 7 - 9                               |
| Participants              | 6       | (a) Give the eligibility criteria, and the sources and methods of selection of participants. Describe methods of follow-up<br>(b) For matched studies, give matching criteria and number of exposed and unexposed                                                                                                      | 7 - 9<br>N/A                        |
| Variables                 | 7       | Clearly define all outcomes, exposures, predictors, potential confounders, and effect modifiers. Give diagnostic criteria, if applicable                                                                                                                                                                               | 9 - 10                              |
| Data sources/measurement  | 8*      | For each variable of interest, give sources of data and details of methods of assessment (measurement). Describe comparability of assessment methods if there is more than one group                                                                                                                                   | 7 - 10                              |
| Bias                      | 9       | Describe any efforts to address potential sources of bias                                                                                                                                                                                                                                                              | 10                                  |
| Study size                | 10      | Explain how the study size was arrived at                                                                                                                                                                                                                                                                              | 11                                  |
| Quantitative variables    | 11      | Explain how quantitative variables were handled in the analyses. If applicable, describe which groupings were chosen and why                                                                                                                                                                                           | 9 - 10                              |
| Statistical methods       | 12      | (a) Describe all statistical methods, including those used to control for confounding<br>(b) Describe any methods used to examine subgroups and interactions<br>(c) Explain how missing data were addressed<br>(d) If applicable, explain how loss to follow-up was addressed<br>(e) Describe any sensitivity analyses | 9 - 10<br>9 - 10<br>10<br>10<br>N/A |
| <b>Results</b>            |         |                                                                                                                                                                                                                                                                                                                        |                                     |
| Participants              | 13*     | (a) Report numbers of individuals at each stage of study—eg numbers potentially eligible, examined for eligibility, confirmed eligible, included in the study, completing follow-up, and analysed<br>(b) Give reasons for non-participation at each stage<br>(c) Consider use of a flow diagram                        | 11<br>11                            |
| Descriptive data          | 14*     | (a) Give characteristics of study participants (eg demographic, clinical, social) and information on exposures and potential confounders<br>(b) Indicate number of participants with missing data for each variable of interest<br>(c) Summarise follow-up time (eg, average and total amount)                         | 9, 11 - 13<br>10                    |
| Outcome data              | 15*     | Report numbers of outcome events or summary measures over time                                                                                                                                                                                                                                                         | 11                                  |

|    |                          |    |                                                                                                                                                                                                              |         |
|----|--------------------------|----|--------------------------------------------------------------------------------------------------------------------------------------------------------------------------------------------------------------|---------|
| 1  | Main results             | 16 | (a) Give unadjusted estimates and, if applicable, confounder-adjusted estimates and their precision (eg, 95% confidence interval). Make clear which confounders were adjusted for and why they were included | 11 - 13 |
| 2  |                          |    | (b) Report category boundaries when continuous variables were categorized                                                                                                                                    | N/A     |
| 3  |                          |    | (c) If relevant, consider translating estimates of relative risk into absolute risk for a meaningful time period                                                                                             |         |
| 4  |                          |    |                                                                                                                                                                                                              |         |
| 5  |                          |    |                                                                                                                                                                                                              |         |
| 6  |                          |    |                                                                                                                                                                                                              |         |
| 7  |                          |    |                                                                                                                                                                                                              |         |
| 8  |                          |    |                                                                                                                                                                                                              |         |
| 9  | Other analyses           | 17 | Report other analyses done—eg analyses of subgroups and interactions, and sensitivity analyses                                                                                                               | 11 - 13 |
| 10 |                          |    |                                                                                                                                                                                                              |         |
| 11 | <b>Discussion</b>        |    |                                                                                                                                                                                                              |         |
| 12 |                          |    |                                                                                                                                                                                                              |         |
| 13 | Key results              | 18 | Summarise key results with reference to study objectives                                                                                                                                                     | 14      |
| 14 | Limitations              | 19 | Discuss limitations of the study, taking into account sources of potential bias or imprecision. Discuss both direction and magnitude of any potential bias                                                   | 17      |
| 15 |                          |    |                                                                                                                                                                                                              |         |
| 16 | Interpretation           | 20 | Give a cautious overall interpretation of results considering objectives, limitations, multiplicity of analyses, results from similar studies, and other relevant evidence                                   | 17      |
| 17 |                          |    |                                                                                                                                                                                                              |         |
| 18 |                          |    |                                                                                                                                                                                                              |         |
| 19 | Generalisability         | 21 | Discuss the generalisability (external validity) of the study results                                                                                                                                        | 17      |
| 20 |                          |    |                                                                                                                                                                                                              |         |
| 21 | <b>Other information</b> |    |                                                                                                                                                                                                              |         |
| 22 | Funding                  | 22 | Give the source of funding and the role of the funders for the present study and, if applicable, for the original study on which the present article is based                                                | 1       |
| 23 |                          |    |                                                                                                                                                                                                              |         |
| 24 |                          |    |                                                                                                                                                                                                              |         |

\*Give information separately for exposed and unexposed groups.

**Note:** An Explanation and Elaboration article discusses each checklist item and gives methodological background and published examples of transparent reporting. The STROBE checklist is best used in conjunction with this article (freely available on the Web sites of PLoS Medicine at <http://www.plosmedicine.org/>, Annals of Internal Medicine at <http://www.annals.org/>, and Epidemiology at <http://www.epidem.com/>). Information on the STROBE Initiative is available at <http://www.strobe-statement.org>.



# BMJ Open

## Association of Maternal Depression and Anxiety with Toddler Social-Emotional and Cognitive Development in South Africa: A prospective cohort study

|                                 |                                                                                                                                                                                                                                                                                                                                                                                                                                                                                                                                                                                                                                                                                                                                                                                                                                                                                                                                                                                                                                                                                                                                                                                                                                            |
|---------------------------------|--------------------------------------------------------------------------------------------------------------------------------------------------------------------------------------------------------------------------------------------------------------------------------------------------------------------------------------------------------------------------------------------------------------------------------------------------------------------------------------------------------------------------------------------------------------------------------------------------------------------------------------------------------------------------------------------------------------------------------------------------------------------------------------------------------------------------------------------------------------------------------------------------------------------------------------------------------------------------------------------------------------------------------------------------------------------------------------------------------------------------------------------------------------------------------------------------------------------------------------------|
| Journal:                        | <i>BMJ Open</i>                                                                                                                                                                                                                                                                                                                                                                                                                                                                                                                                                                                                                                                                                                                                                                                                                                                                                                                                                                                                                                                                                                                                                                                                                            |
| Manuscript ID                   | bmjopen-2021-058135.R2                                                                                                                                                                                                                                                                                                                                                                                                                                                                                                                                                                                                                                                                                                                                                                                                                                                                                                                                                                                                                                                                                                                                                                                                                     |
| Article Type:                   | Original research                                                                                                                                                                                                                                                                                                                                                                                                                                                                                                                                                                                                                                                                                                                                                                                                                                                                                                                                                                                                                                                                                                                                                                                                                          |
| Date Submitted by the Author:   | 17-Mar-2022                                                                                                                                                                                                                                                                                                                                                                                                                                                                                                                                                                                                                                                                                                                                                                                                                                                                                                                                                                                                                                                                                                                                                                                                                                |
| Complete List of Authors:       | Shuffrey, Lauren; Columbia University Irving Medical Center, Psychiatry; New York State Psychiatric Institute, Division of Developmental Neuroscience<br>Sania, Ayesha; Columbia University Irving Medical Center, Psychiatry; New York State Psychiatric Institute, Division of Developmental Neuroscience<br>Brito, Natalie; New York University, Department of Applied Psychology<br>Potter, Mandy; Stellenbosch University Faculty of Medicine and Health Sciences, Obstetrics and Gynaecology<br>Springer, Priscilla; Stellenbosch University, Paediatrics and Child Health<br>Lucchini, Maristella ; Columbia University Irving Medical Center, Psychiatry; New York State Psychiatric Institute, Neuroscience<br>Rayport, Yael; Columbia University Irving Medical Center, Department of Psychiatry; New York State Psychiatric Institute, Neuroscience<br>Du Plessis, Carlie; Stellenbosch University Faculty of Medicine and Health Sciences, Department of Obstetrics and Gynaecology<br>Odendaal, H. J.; Stellenbosch University Faculty of Medicine and Health Sciences, Obstetrics & Gynaecology<br>Fifer, William; Columbia University Irving Medical Center, Psychiatry; New York State Psychiatric Institute, Neuroscience |
| <b>Primary Subject Heading</b>: | Global health                                                                                                                                                                                                                                                                                                                                                                                                                                                                                                                                                                                                                                                                                                                                                                                                                                                                                                                                                                                                                                                                                                                                                                                                                              |
| Secondary Subject Heading:      | Mental health, Paediatrics                                                                                                                                                                                                                                                                                                                                                                                                                                                                                                                                                                                                                                                                                                                                                                                                                                                                                                                                                                                                                                                                                                                                                                                                                 |
| Keywords:                       | Community child health < PAEDIATRICS, Depression & mood disorders < PSYCHIATRY, Anxiety disorders < PSYCHIATRY, Child & adolescent psychiatry < PSYCHIATRY                                                                                                                                                                                                                                                                                                                                                                                                                                                                                                                                                                                                                                                                                                                                                                                                                                                                                                                                                                                                                                                                                 |
|                                 |                                                                                                                                                                                                                                                                                                                                                                                                                                                                                                                                                                                                                                                                                                                                                                                                                                                                                                                                                                                                                                                                                                                                                                                                                                            |

SCHOLARONE™  
Manuscripts



I, the Submitting Author has the right to grant and does grant on behalf of all authors of the Work (as defined in the below author licence), an exclusive licence and/or a non-exclusive licence for contributions from authors who are: i) UK Crown employees; ii) where BMJ has agreed a CC-BY licence shall apply, and/or iii) in accordance with the terms applicable for US Federal Government officers or employees acting as part of their official duties; on a worldwide, perpetual, irrevocable, royalty-free basis to BMJ Publishing Group Ltd ("BMJ") its licensees and where the relevant Journal is co-owned by BMJ to the co-owners of the Journal, to publish the Work in this journal and any other BMJ products and to exploit all rights, as set out in our [licence](#).

The Submitting Author accepts and understands that any supply made under these terms is made by BMJ to the Submitting Author unless you are acting as an employee on behalf of your employer or a postgraduate student of an affiliated institution which is paying any applicable article publishing charge ("APC") for Open Access articles. Where the Submitting Author wishes to make the Work available on an Open Access basis (and intends to pay the relevant APC), the terms of reuse of such Open Access shall be governed by a Creative Commons licence – details of these licences and which [Creative Commons](#) licence will apply to this Work are set out in our licence referred to above.

Other than as permitted in any relevant BMJ Author's Self Archiving Policies, I confirm this Work has not been accepted for publication elsewhere, is not being considered for publication elsewhere and does not duplicate material already published. I confirm all authors consent to publication of this Work and authorise the granting of this licence.

**Title:** Association of Maternal Depression and Anxiety with Toddler Social-Emotional and Cognitive Development in South Africa: A prospective cohort study

**Lauren C. Shuffrey**\*<sup>1,2</sup>, **Ayesha Sania**\*<sup>1,2</sup>, Natalie H. Brito<sup>3</sup>, Mandy Potter<sup>4</sup>, Priscilla E. Springer<sup>5</sup>, Maristella Lucchini<sup>1,2</sup>, Yael K. Rayport<sup>1,2</sup>, Carlie Du Plessis<sup>4</sup>, Hein J. Odendaal<sup>4</sup>, William P. Fifer<sup>1,2,6</sup>

<sup>1</sup> Department of Psychiatry, Columbia University Irving Medical Center, New York, NY 10032 USA

<sup>2</sup> Division of Developmental Neuroscience, New York State Psychiatric Institute, New York, NY 10032 USA

<sup>3</sup> Department of Applied Psychology, New York University, New York, NY, 10003 USA

<sup>4</sup> Department of Obstetrics and Gynaecology, Faculty of Medicine and Health Science, Stellenbosch University, Cape Town, Western Cape, South Africa 7530

<sup>5</sup> Department of Paediatrics and Child Health, Stellenbosch University, Cape Town, Western Cape, South Africa 7530

<sup>6</sup> Department of Pediatrics, Columbia University Irving Medical Center, New York, NY 10032 USA

\* denotes shared authorship

**Corresponding Author:**

Lauren C. Shuffrey, PhD  
Columbia University Medical Center  
New York State Psychiatric Institute  
1051 Riverside Drive, Unit 40  
New York, New York 10032  
lcg2129@cumc.columbia.edu

**Financial Support:** This research was supported by the Bill and Melinda Gates Foundation (WPF) and grants U01HD055154, U01HD045935, U01HD055155, and U01HD045991 issued by the *Eunice Kennedy Shriver* National Institute of Child Health and Human Development (NICHD) and grant U01AA016501 issued by the National Institute on Alcohol Abuse and Alcoholism (NIAAA). Dr. Lauren Shuffrey is supported by K99HD103910 issued by the Eunice Kennedy Shriver National Institute Of Child Health & Human Development. Dr. Ayesha Sania is supported by UH3OD023279-05S1, re-entry supplement from Office of the Director, NIH, and Office of Research on Women Health (ORWH). The content is solely the responsibility of the authors and does not necessarily represent the official views of the National Institutes of Health.

**Competing Interests:** The authors have no competing interests to declare.

**Data availability:** Data are available upon reasonable request.

**Patient and Public Involvement:** Patients or the public were not involved in the design, or conduct, or reporting, or dissemination plans of our research

## **Abstract:**

**Objective:** A robust literature has identified associations between prenatal maternal depression and adverse child social-emotional and cognitive outcomes. The majority of prior research is from high-income countries despite increased reporting of perinatal depression in low and middle income countries (LMICs). Additionally, despite the comorbidity between depression and anxiety, few prior studies have examined their joint impact on child neurodevelopment. The objective of the current analysis was to examine associations between prenatal maternal depression and anxiety with child social-emotional and cognitive development in a cohort from the Western Cape Province of South Africa.

**Design:** Prenatal maternal depression and anxiety were measured using the Edinburgh Postnatal Depression Scale (EPDS) and the State-Trait Anxiety Scale (STAI) at 20 – 24 weeks' gestation. Child neurobehavior was assessed at age 3 using the Brief Infant Toddler Social Emotional Assessment (BITSEA) and the Bayley Scales of Infant Development Screening Test (BSID-III ST). We used linear regression models to examine the independent and joint association between prenatal maternal depression, anxiety, and child developmental outcomes.

**Results:** Participants consisted of 600 maternal-infant dyads (274 females; gestational age at birth: 38.89 weeks  $\pm$  2.03). Children born to mothers with both prenatal depression and trait anxiety had higher social-emotional problems (mean difference: 4.66; 95% CI 3.43, 5.90) compared to children born to mothers with no prenatal depression or trait anxiety, each condition alone, or compared to mothers with depression and state anxiety. Additionally, children born to mothers with prenatal maternal depression and trait anxiety had the greatest reduction in mean cognitive scores on the BSID-III ST (mean difference: -1.04; 95% CI -1.99, -0.08).

**Conclusions:** The observed association between comorbid prenatal maternal depression and chronic anxiety with subsequent child social-emotional and cognitive development underscores the need for targeting mental health support in perinatal women in LMICs to improve long-term child neurobehavioral outcomes.

### **Strengths and limitations of this study**

- The current study included a prospective evaluation of maternal depression and anxiety symptoms during pregnancy and prospective assessment of cognitive and social-emotional outcomes within the same cohort in a large sample of South African mother-children pairs.
- Limitations include a lack of data on maternal mental health assessments postnatally and mother-child dyadic measures, which are potential mediators of the relationship between prenatal maternal depression, prenatal maternal anxiety, and child developmental outcomes.
- This study addresses a significant gap in the literature in research examining the impact of prenatal maternal psychological health on child neurobehavioral development in resource-poor communities.

**Keywords:** prenatal depression, prenatal anxiety; social-emotional development; cognitive development

## Introduction

Decades of research on the early origins of behavior has promoted the concept that the prenatal environment has a profound impact on one's risk for the development of neurodevelopmental or psychiatric disorders<sup>1 2</sup>. Several prior studies have identified associations between prenatal maternal depression and increased risk for social-emotional problems and decrements in cognitive development. However, the majority of prior research in this domain is from high-income countries (HICs), despite increased reporting of perinatal depression in low and middle income countries (LMICs) including South Africa where an estimated 35% women report prenatal depression<sup>3 4</sup>. Additionally, despite the comorbidity between depression and anxiety, few prior studies have examined their joint impact on child neurodevelopment.

Several studies in HICs have identified associations between prenatal maternal depression, anxiety, and offspring behavioral, social-emotional, and cognitive development<sup>5</sup>. Specifically, a meta-analysis demonstrated adverse effects of prenatal maternal depression and anxiety on child social-emotional problems, with odds ratios of 1.79 and 1.50 respectively<sup>6</sup>. Prenatal maternal depression and anxiety are also associated with cognitive and language deficits<sup>7 8</sup>, delayed motor development<sup>8</sup>, emotional and behavior dysregulation<sup>9-11</sup>, inattention and hyperactivity<sup>12-14</sup>, and difficult temperament<sup>15</sup>. A more recent meta-analysis not only confirmed prior reports, but also found that the effects of perinatal maternal depression extend beyond infancy through adolescence<sup>16</sup>.

The developmental origins of health and disease (DOHaD) model posits that maternal psychological distress during pregnancy (e.g. perceived stress, depression, anxiety, post-traumatic stress) may result in changes in hypothalamic pituitary adrenal (HPA) axis function and upregulation of inflammatory processes with downstream effects on offspring perinatal brain

1  
2  
3 development and behavior<sup>17</sup>. Prior research suggests comorbid prenatal maternal depression and  
4  
5 anxiety may be associated with the greatest increases in maternal HPA-axis activity and  
6  
7 differential changes in immunologic activity. Specifically, comorbid prenatal maternal  
8  
9 depression and anxiety have been associated with a greater increase in salivary cortisol levels<sup>18</sup>,  
10  
11 TH1 secreted cytokines, TH2 secreted cytokines, and TH17 secreted cytokines<sup>19</sup> compared to  
12  
13 either condition alone. Other research suggests cytokine profiles may differ between individuals  
14  
15 with prenatal maternal depression and anxiety<sup>19-21</sup>.  
16  
17  
18

19 Risk factors may be exacerbated in LMICs such as South Africa, where both poverty and  
20  
21 perinatal mental health disorders are highly prevalent<sup>22 23</sup>. Specifically, in South Africa maternal  
22  
23 mood disorders have been linked to structural and community stressors associated with markers  
24  
25 of poverty including less than a high school education, lack of social support, alcohol use, family  
26  
27 stress, food insecurity, lack of partner involvement, and intimate partner violence<sup>24-28</sup>. There are  
28  
29 few prior studies that have examined the impact of prenatal maternal mental health on offspring  
30  
31 social-emotional or cognitive development in South Africa. While the few prior studies reported  
32  
33 significant harmful effects of prenatal maternal stress or perinatal maternal depression, there is  
34  
35 still a significant gap in the literature in research examining the impact of prenatal maternal  
36  
37 psychological health on child neurobehavioral development in resource-poor communities<sup>24 29 30</sup>.  
38  
39 Additionally, to our knowledge no prior South African studies have examined the joint effect of  
40  
41 prenatal maternal depression and anxiety on child neurobehavioral outcomes. Research  
42  
43 examining the long-term impact of prenatal maternal depression and anxiety on child behavioral  
44  
45 and cognitive outcomes is critical for providing justification to local public health services for  
46  
47 targeting mental health support in perinatal women from underserved communities.  
48  
49  
50  
51  
52  
53  
54  
55  
56  
57  
58  
59  
60

1  
2  
3 The objective of the current analysis was to determine if prenatal maternal depression and  
4 state or trait anxiety were associated with child social-emotional problems or cognitive  
5 development at approximately three years of age in a South African cohort from the Western  
6 Cape.  
7  
8  
9  
10  
11  
12  
13  
14

## 15 **Materials and Methods**

16  
17 *Participants.* Participants were a subset of infants with available outcome data at age 3 enrolled  
18 in the Safe Passage Study conducted by the Prenatal Alcohol and SIDS and Stillbirth (PASS)  
19 Network, a multi-center study investigating the role of prenatal exposure in risk for sudden infant  
20 death syndrome (SIDS), stillbirth, and fetal alcohol spectrum disorders. Eligibility criteria for the  
21 Safe Passage study included the ability to provide informed consent in English or Afrikaans, 16  
22 years of age or older at the time of consent, and a gestational age between 6 weeks and 40 weeks  
23 at the time of consent based on estimated delivery date<sup>31</sup>. Exclusion Criteria for prenatal  
24 maternal enrollment into the Safe Passage study included planned therapeutic abortion, moving  
25 out of the catchment area prior to estimated date of delivery, and clinical judgment. Informed  
26 consent was obtained for the Safe Passage study and from a parent or legal guardian of each  
27 participant for developmental follow-up assessments. Ethical approval was obtained for both  
28 time points from the Health Research Ethics Committee of Stellenbosch University and the New  
29 York State Psychiatric Institute.  
30  
31  
32  
33  
34  
35  
36  
37  
38  
39  
40  
41  
42  
43  
44  
45  
46  
47  
48  
49

### 50 **Maternal Assessments.**

51 *Maternal-infant chart abstraction, demographic, and socioeconomic measures.* Maternal-  
52 infant medical charts were abstracted to obtain maternal age at delivery, gestational age at birth,  
53  
54  
55  
56  
57  
58  
59  
60



1  
2  
3 mode of delivery, and the infant's biological sex. Measures to collect prenatal alcohol, tobacco,  
4 and recreational drug exposure have been previously described<sup>31 32</sup>. Prenatal maternal alcohol  
5 and tobacco use behaviors were previously characterized using cluster analysis<sup>33 34</sup>. Through  
6 study specific case report forms, participants indicated demographic and socioeconomic  
7 information including race, maternal educational attainment, household crowding (persons per  
8 room in household), access to running water inside the house, prenatal care during pregnancy,  
9 and marital status.

10  
11  
12  
13  
14  
15  
16  
17  
18  
19 *Self-reported depression and anxiety measures.* Information regarding maternal mental  
20 health during pregnancy was obtained at 20 – 24 weeks' gestation. Depressive symptoms were  
21 measured using the Edinburgh Postnatal Depression Scale (EPDS), a depression screening tool  
22 developed to specifically assess depressive symptoms in perinatal women where higher scores  
23 indicate more severe depressive symptoms<sup>35 36</sup>. The EPDS is widely used and has been validated  
24 in English and Afrikaans in South Africa<sup>35 37</sup>. Prior studies have used a cut-off score of  $\geq 12$  or  $\geq$   
25 13 to be indicative of major depression within perinatal women living in South Africa<sup>35 37</sup>.  
26 Maternal anxiety symptoms were measured using the State-Trait Anxiety Inventory (STAI)<sup>38</sup>, an  
27 anxiety screening tool to distinguish anxiety symptoms from depressive symptoms which has  
28 also been validated in both languages<sup>39</sup>. The STAI has two subscales, state anxiety which reflects  
29 the participant's current state of anxiety when completing the questionnaires and trait anxiety,  
30 which is thought to be consistent across time and reflect personality traits. In HICs, the STAI has  
31 a cut-off score of  $\geq 40$  on both the state anxiety and trait anxiety subscales to indicate a threshold  
32 for clinical levels of anxiety. Based on these prior studies, we used a cutoff of  $\geq 13$  to indicate  
33 maternal depression, a cutoff of  $> 40$  on the STAI-state subscale to indicate state anxiety, and a  
34  
35  
36  
37  
38  
39  
40  
41  
42  
43  
44  
45  
46  
47  
48  
49  
50  
51  
52  
53  
54  
55  
56  
57  
58  
59  
60

1  
2  
3 cutoff of > 40 on the STAI-trait subscale to indicate trait anxiety.  
4  
5  
6

7  
8 Toddler Developmental Assessments.  
9

10 *Bayley Scales of Infant Development III Screening Test.* The Bayley Scales of Infant  
11 Development III Screening Test (BSID-III ST) were designed as a rapid assessment of cognitive,  
12 language, and motor functioning in infants and young children in order to determine if a child's  
13 development is within normal limits and identify risk for developmental delay. The BSID-III ST  
14 has high test-retest reliability: Cognitive (0.85), Receptive Language (0.88), Expressive  
15 Language (0.88), Fine Motor (0.82), and Gross Motor (0.86). Although the BSID-III ST does not  
16 identify degree of impairment, the cut-off points indicate whether a child shows competence in  
17 age-appropriate tasks, evidence of emerging age-appropriate skills, and evidence of being at risk  
18 for developmental delay. The BSID has been validated and widely used throughout South  
19 Africa<sup>40 41</sup>.  
20  
21  
22  
23  
24  
25  
26  
27  
28  
29  
30  
31  
32

33 *Brief Infant Toddler Social Emotional Assessment (BITSEA).* The Brief Infant-Toddler  
34 Social and Emotional Assessment (BITSEA) is a 42-item parental report measure of social-  
35 emotional development, behavioral problems, and delays in competence<sup>42</sup>. Domains assessed  
36 within the BITSEA include: externalizing (activity/impulsivity, aggression/defiance, peer  
37 aggression), internalizing (depression/withdrawal, anxiety, separation distress, inhibition to  
38 novelty), dysregulation (sleep, negative emotionality, eating, sensory sensitivity), and  
39 competence (compliance, attention, imitation/play, mastery motivation, empathy, and pro-social  
40 peer relations)<sup>42</sup>. Findings from the BITSEA validation study provide preliminary support for the  
41 BITSEA as a reliable and valid brief screener for infant-toddler social-emotional and behavioral  
42 problems in addition to delays in competence<sup>43</sup>. When used in socioeconomically and ethnically  
43  
44  
45  
46  
47  
48  
49  
50  
51  
52  
53  
54  
55  
56  
57  
58  
59  
60

1  
2  
3 diverse community-based populations, the BITSEA demonstrated excellent test-retest reliability  
4  
5 and good inter-rater agreement between parents<sup>42</sup>.  
6  
7  
8  
9

10 Statistical Analyses. Using multiple linear regression models, we estimated independent and  
11 joint effects of maternal depression and state and trait anxiety on social-emotional problem,  
12 social emotional competence, and cognitive development scores. Two, separate four-level  
13 categorical prenatal maternal mental health variables were created to assess the impact of  
14 prenatal maternal depression, trait anxiety, and state anxiety. We created a prenatal maternal  
15 depression and trait anxiety variable with four categories: (1) *No Prenatal Depression or Trait*  
16 *Anxiety* (n=199; 33.17%, Reference Category), (2) *Prenatal Depression Only* (106; 17.67%), (3)  
17 *Prenatal Trait Anxiety Only* (n=68; 11.33%) and (4) *Prenatal Maternal Depression and Trait*  
18 *Anxiety* (n=227; 37.83%) (Table 1). In separate models we additionally examined the  
19 independent and joint effects of prenatal maternal depression and state anxiety. We created a  
20 prenatal maternal depression and state anxiety variable with four categories: (1) *No Prenatal*  
21 *Depression or State Anxiety* (n=248; 41.33%; Reference Category), (2) *Prenatal Depression*  
22 *Only* (n=237; 39.50%), (3) *Prenatal State Anxiety Only* (n=19; 3.17%) and (4) *Prenatal*  
23 *Maternal Depression and State Anxiety* (n=96; 16%) (Table 1). For each regression model, either  
24 *No Prenatal Maternal Depression or Trait Anxiety* or *No Prenatal Maternal Depression and*  
25 *State Anxiety* was set as the reference category. Minimally adjusted models included sex,  
26 gestational age at birth, and age at follow up as covariates. Fully adjusted models additionally  
27 controlled for prenatal maternal alcohol use, prenatal maternal tobacco use, maternal  
28 employment status at delivery, maternal educational attainment at delivery, parity, and the  
29 household crowding index. We used missing indicator methods and median imputation to  
30  
31  
32  
33  
34  
35  
36  
37  
38  
39  
40  
41  
42  
43  
44  
45  
46  
47  
48  
49  
50  
51  
52  
53  
54  
55  
56  
57  
58  
59  
60

account for missing categorical and continuous covariate data, respectively (described in Table 1).

All analyses were performed in SAS software version 9.4 (SAS Institute, Cary NC).

## Results

*Maternal and Child Demographic Characteristics.* The participants included in the present analysis consisted of mothers and their infant born between April 2014 and August 2015 from the Western Cape Province of South Africa who participated in a follow-up study to examine social-emotional development and cognitive development at approximately three years of age. A total of n=18 mother-infant dyads were excluded due to missing maternal prenatal mental health data. The final sample consisted of 600 maternal-infant dyads (274 females; gestational age at birth: 38.89 weeks  $\pm$  2.03) (Table 1).

*Child Social-Emotional Development.* Based on the BITSEA problem scale percentile rank score of 26 or higher, 51% of children (306/600) were classified as having a “possible problem”. Based on the BITSEA competence scale percentile rank score of 15 or lower, 5% (30/600) of children were classified in the “possible deficit/delay range” for social competencies (Table 2). There were no significant sex differences in social-emotional problems on the BITSEA, however girls had significantly higher social-emotional competence compared to boys (mean difference: 0.38, CI: 0.05, 0.71,  $p = 0.03$ )

*Association between Prenatal Maternal Depression, Trait Anxiety, and Child Social-Emotional Development.* Compared to children born to mothers with no prenatal depression or trait anxiety, children born to mothers with prenatal depression and trait anxiety had higher social-emotional problems (mean difference: 4.66; 95% CI 3.43, 5.90), followed by prenatal maternal trait anxiety only (mean difference: 3.87; 95% CI 2.07, 5.66), and finally prenatal maternal depression only (mean difference: 2.76; 95% CI 1.23, 4.29) in minimally adjusted

1  
2  
3 models. These associations remained significant in fully adjusted models where similarly  
4 comorbid prenatal maternal depression and trait anxiety group was associated with the highest  
5 child social-emotional problems (mean difference: 4.33; 95% CI 2.90, 5.67), followed by  
6 prenatal maternal trait anxiety only (mean difference: 3.23; 95% CI 1.19, 5.27), with the smallest  
7 mean difference for prenatal maternal depression only group (mean difference: 2.64; 95% CI  
8 1.02, 4.27) as compared to the no prenatal depression or trait anxiety group (Figure 1).

9  
10  
11  
12  
13  
14  
15  
16 Additional significant predictors in the multivariate models were parity of 3 or greater which was  
17 associated with lower social-emotional problems (mean difference: -3.02, 95% CI -4.63, -1.40)  
18 and low continuous smoking during pregnancy which was associated with higher social-  
19 emotional problems (mean difference: 1.39, 95% CI 0.039, 2.74). There were no significant  
20 associations between prenatal maternal depression, trait anxiety, and child social-emotional  
21 competence.  
22  
23  
24  
25  
26  
27  
28  
29

30  
31 *Association between Prenatal Maternal Depression, State Anxiety, and Child Social-*  
32 *Emotional Development.* Compared to children born to mothers with no prenatal depression or  
33 state anxiety, children born to mothers with comorbid prenatal depression and state anxiety had  
34 higher social-emotional problems (mean difference: 4.29; 95% CI 2.73, 5.84). Children born to  
35 mothers with prenatal depression only also had higher social-emotional problems compared to  
36 mothers with no prenatal depression or state anxiety (mean difference: 2.71; 95% CI 1.51, 3.88).  
37  
38  
39  
40  
41  
42  
43  
44  
45  
46  
47  
48  
49  
50  
51  
52  
53  
54  
55  
56  
57  
58  
59  
60  
61  
62  
63  
64  
65  
66  
67  
68  
69  
70  
71  
72  
73  
74  
75  
76  
77  
78  
79  
80  
81  
82  
83  
84  
85  
86  
87  
88  
89  
90  
91  
92  
93  
94  
95  
96  
97  
98  
99  
100  
101  
102  
103  
104  
105  
106  
107  
108  
109  
110  
111  
112  
113  
114  
115  
116  
117  
118  
119  
120  
121  
122  
123  
124  
125  
126  
127  
128  
129  
130  
131  
132  
133  
134  
135  
136  
137  
138  
139  
140  
141  
142  
143  
144  
145  
146  
147  
148  
149  
150  
151  
152  
153  
154  
155  
156  
157  
158  
159  
160  
161  
162  
163  
164  
165  
166  
167  
168  
169  
170  
171  
172  
173  
174  
175  
176  
177  
178  
179  
180  
181  
182  
183  
184  
185  
186  
187  
188  
189  
190  
191  
192  
193  
194  
195  
196  
197  
198  
199  
200  
201  
202  
203  
204  
205  
206  
207  
208  
209  
210  
211  
212  
213  
214  
215  
216  
217  
218  
219  
220  
221  
222  
223  
224  
225  
226  
227  
228  
229  
230  
231  
232  
233  
234  
235  
236  
237  
238  
239  
240  
241  
242  
243  
244  
245  
246  
247  
248  
249  
250  
251  
252  
253  
254  
255  
256  
257  
258  
259  
260  
261  
262  
263  
264  
265  
266  
267  
268  
269  
270  
271  
272  
273  
274  
275  
276  
277  
278  
279  
280  
281  
282  
283  
284  
285  
286  
287  
288  
289  
290  
291  
292  
293  
294  
295  
296  
297  
298  
299  
300  
301  
302  
303  
304  
305  
306  
307  
308  
309  
310  
311  
312  
313  
314  
315  
316  
317  
318  
319  
320  
321  
322  
323  
324  
325  
326  
327  
328  
329  
330  
331  
332  
333  
334  
335  
336  
337  
338  
339  
340  
341  
342  
343  
344  
345  
346  
347  
348  
349  
350  
351  
352  
353  
354  
355  
356  
357  
358  
359  
360  
361  
362  
363  
364  
365  
366  
367  
368  
369  
370  
371  
372  
373  
374  
375  
376  
377  
378  
379  
380  
381  
382  
383  
384  
385  
386  
387  
388  
389  
390  
391  
392  
393  
394  
395  
396  
397  
398  
399  
400  
401  
402  
403  
404  
405  
406  
407  
408  
409  
410  
411  
412  
413  
414  
415  
416  
417  
418  
419  
420  
421  
422  
423  
424  
425  
426  
427  
428  
429  
430  
431  
432  
433  
434  
435  
436  
437  
438  
439  
440  
441  
442  
443  
444  
445  
446  
447  
448  
449  
450  
451  
452  
453  
454  
455  
456  
457  
458  
459  
460  
461  
462  
463  
464  
465  
466  
467  
468  
469  
470  
471  
472  
473  
474  
475  
476  
477  
478  
479  
480  
481  
482  
483  
484  
485  
486  
487  
488  
489  
490  
491  
492  
493  
494  
495  
496  
497  
498  
499  
500  
501  
502  
503  
504  
505  
506  
507  
508  
509  
510  
511  
512  
513  
514  
515  
516  
517  
518  
519  
520  
521  
522  
523  
524  
525  
526  
527  
528  
529  
530  
531  
532  
533  
534  
535  
536  
537  
538  
539  
540  
541  
542  
543  
544  
545  
546  
547  
548  
549  
550  
551  
552  
553  
554  
555  
556  
557  
558  
559  
560  
561  
562  
563  
564  
565  
566  
567  
568  
569  
570  
571  
572  
573  
574  
575  
576  
577  
578  
579  
580  
581  
582  
583  
584  
585  
586  
587  
588  
589  
590  
591  
592  
593  
594  
595  
596  
597  
598  
599  
600  
601  
602  
603  
604  
605  
606  
607  
608  
609  
610  
611  
612  
613  
614  
615  
616  
617  
618  
619  
620  
621  
622  
623  
624  
625  
626  
627  
628  
629  
630  
631  
632  
633  
634  
635  
636  
637  
638  
639  
640  
641  
642  
643  
644  
645  
646  
647  
648  
649  
650  
651  
652  
653  
654  
655  
656  
657  
658  
659  
660  
661  
662  
663  
664  
665  
666  
667  
668  
669  
670  
671  
672  
673  
674  
675  
676  
677  
678  
679  
680  
681  
682  
683  
684  
685  
686  
687  
688  
689  
690  
691  
692  
693  
694  
695  
696  
697  
698  
699  
700  
701  
702  
703  
704  
705  
706  
707  
708  
709  
710  
711  
712  
713  
714  
715  
716  
717  
718  
719  
720  
721  
722  
723  
724  
725  
726  
727  
728  
729  
730  
731  
732  
733  
734  
735  
736  
737  
738  
739  
740  
741  
742  
743  
744  
745  
746  
747  
748  
749  
750  
751  
752  
753  
754  
755  
756  
757  
758  
759  
760  
761  
762  
763  
764  
765  
766  
767  
768  
769  
770  
771  
772  
773  
774  
775  
776  
777  
778  
779  
780  
781  
782  
783  
784  
785  
786  
787  
788  
789  
790  
791  
792  
793  
794  
795  
796  
797  
798  
799  
800  
801  
802  
803  
804  
805  
806  
807  
808  
809  
810  
811  
812  
813  
814  
815  
816  
817  
818  
819  
820  
821  
822  
823  
824  
825  
826  
827  
828  
829  
830  
831  
832  
833  
834  
835  
836  
837  
838  
839  
840  
841  
842  
843  
844  
845  
846  
847  
848  
849  
850  
851  
852  
853  
854  
855  
856  
857  
858  
859  
860  
861  
862  
863  
864  
865  
866  
867  
868  
869  
870  
871  
872  
873  
874  
875  
876  
877  
878  
879  
880  
881  
882  
883  
884  
885  
886  
887  
888  
889  
890  
891  
892  
893  
894  
895  
896  
897  
898  
899  
900  
901  
902  
903  
904  
905  
906  
907  
908  
909  
910  
911  
912  
913  
914  
915  
916  
917  
918  
919  
920  
921  
922  
923  
924  
925  
926  
927  
928  
929  
930  
931  
932  
933  
934  
935  
936  
937  
938  
939  
940  
941  
942  
943  
944  
945  
946  
947  
948  
949  
950  
951  
952  
953  
954  
955  
956  
957  
958  
959  
960  
961  
962  
963  
964  
965  
966  
967  
968  
969  
970  
971  
972  
973  
974  
975  
976  
977  
978  
979  
980  
981  
982  
983  
984  
985  
986  
987  
988  
989  
990  
991  
992  
993  
994  
995  
996  
997  
998  
999  
1000

1  
2  
3 associated with higher social-emotional problems (mean difference: 1.44; 95% CI 0.075, 2.81),  
4  
5 and finally less than a high school education (some primary school only) which was associated  
6  
7 with higher social-emotional problems (mean difference: 3.47; 95% CI 0.248, 6.70). However,  
8  
9 there was no significant association between prenatal state anxiety only and child social-  
10  
11 emotional problems on the BITSEA. There were also no significant associations between  
12  
13 prenatal maternal depression, state anxiety, and social-emotional competence.  
14  
15

16  
17 *Child Cognitive, Language, and Motor Development.* Based on normative cognitive  
18  
19 cutoff scores defined by the BSID-III ST, 4% of children (24/600) were classified as at-risk  
20  
21 (Table 2). Risk classification percentages were similar across all subdomains, expressive  
22  
23 language: 4% , receptive language: 6%, gross motor: 4%, and fine motor: 3%. There were no  
24  
25 significant sex differences in child cognitive scores.  
26  
27

28  
29 *Association between Prenatal Maternal Depression, Trait Anxiety, and Child Cognitive,*  
30  
31 *Language, and Motor Development.* Compared to children born to mothers with no prenatal  
32  
33 depression or trait anxiety, children born to mothers with comorbid prenatal depression and trait  
34  
35 anxiety had lower cognitive scores on the BSID-III ST (mean difference: -1.04; 95% CI -1.99, -  
36  
37 0.08). Results remained significant in the fully adjusted model (mean difference: -1.11; 95% CI -  
38  
39 2.13, -0.09) (Figure 2) and in posthoc analyses where we additionally controlled for language of  
40  
41 administration for the BSID-III ST (mean difference: -0.51, 95% CI -0.99, -0.042). Children who  
42  
43 were assessed on the BSID-III ST in Afrikaans (mean difference: -1.00, 95% CI -1.48, -0.52) or  
44  
45 who were assessed in mixed English and Afrikaans (mean difference: -1.30, 95% CI -2.07, -  
46  
47 0.54) has significantly lower cognitive scores compared to children assessed in English. Low  
48  
49 continuous prenatal maternal alcohol use was also associated with lower cognitive scores (mean  
50  
51 difference: -1.30; 95% CI -2.36, -0.24).  
52  
53  
54  
55  
56  
57  
58  
59  
60

1  
2  
3 *Association between Prenatal Maternal Depression, State Anxiety, and Child Cognitive,*  
4 *Language, and Motor Development.* Compared to children born to mothers with neither prenatal  
5 depression nor trait anxiety, there was no significant association between cognitive scores for  
6 children born to mothers with prenatal depression only, prenatal trait anxiety only, or combined  
7 prenatal depression and trait anxiety in either the minimally or fully adjusted models.  
8  
9  
10  
11  
12  
13  
14  
15  
16

## 17 **Discussion**

18  
19 In summary, we found the greatest increase in child social-emotional problems in  
20 children born to women with comorbid prenatal depression and trait anxiety compared to women  
21 with no prenatal depression or trait anxiety, prenatal depression alone, or prenatal trait anxiety  
22 alone. We additionally found a significant association between comorbid prenatal maternal  
23 depression and state anxiety on higher child social-emotional problems; however, we found no  
24 association between prenatal maternal state anxiety in the absence of prenatal maternal  
25 depression on child social-emotional problems. Finally, we reported children born to mothers  
26 with prenatal maternal depression and trait anxiety had lower cognitive scores on the BSID-III  
27 ST, but we did not find an association between prenatal maternal depression alone on cognitive  
28 outcomes at 3-years of age.  
29  
30  
31  
32  
33  
34  
35  
36  
37  
38  
39  
40  
41

42 Our finding linking prenatal maternal depression and anxiety to social-emotional risk  
43 parallels two recent South African studies linking increased prenatal maternal stressors to higher  
44 behavioral problems in children with an odds ratio of 2.52, but not before 4 years of age<sup>29</sup> and  
45 increased perinatal depression to aggressive behaviors at 60 months of age<sup>24</sup>. Our findings are  
46 also largely consistent with a recent meta-analysis of studies predominately conducted in HICs,  
47 which found prenatal maternal depression and anxiety were associated with higher social-  
48  
49  
50  
51  
52  
53  
54  
55  
56  
57  
58  
59  
60

1  
2  
3 emotional problems in offspring with larger effect sizes for prenatal maternal depression (OR  
4 1.79; 95% CI 1.61 - 1.99) compared to prenatal maternal anxiety (OR 1.50, 95% CI, 1.36 -  
5 1.64)<sup>6</sup>. We found the greatest increase in child social-emotional problems in children born to  
6 women with comorbid prenatal depression and trait anxiety and no effect of prenatal maternal  
7 state anxiety in the absence of prenatal maternal depression on child social-emotional problems.  
8  
9 Our results are suggestive that chronic anxiety measured via trait anxiety may be more predictive  
10 of child social-emotional outcomes than a single measurement of concurrent anxiety during  
11 pregnancy.  
12  
13  
14  
15  
16  
17  
18  
19  
20

21 A prior meta-analysis<sup>6</sup> also found stronger effects of prenatal maternal depression and  
22 anxiety on child social-emotional outcomes when sociodemographic risk factors such as low-  
23 income, lower levels of parental education, or single family households, were highest<sup>6</sup>. Similarly,  
24 we found that lower levels of maternal education, low continuous tobacco use during pregnancy,  
25 and low continuous alcohol use during pregnancy were associated with higher social-emotional  
26 problems in children at three years of age. Intriguingly, maternal parity of 3 or greater was  
27 protective and associated with lower social-emotional problems which may be due to reduced  
28 depression and anxiety levels in women with higher parity, changes in the perception of their  
29 child's behavior due to having multiple children, or additional social opportunities during sibling  
30 interactions<sup>44 45</sup>.  
31  
32  
33  
34  
35  
36  
37  
38  
39  
40  
41  
42  
43

44 The Drakenstein Child Health Study based in the Western Cape found approximately  
45 50% of the overall sample (369/731) were categorized as having cognitive delay at two years of  
46 age based on cutoffs defined by United States (US) normative data<sup>30</sup>. Better cognitive outcomes  
47 were associated with higher maternal education, older child age, a primigravid mother, and  
48 higher socioeconomic status whereas prenatal maternal depression was associated with a 1.03  
49  
50  
51  
52  
53  
54  
55  
56  
57  
58  
59  
60



1  
2  
3 SD (95% CI -1.94 to -0.12) reduction in cognitive scores on the Bayley Scales of Infant and  
4 Toddler Development at two years of age<sup>30</sup>. Similar to the Drakenstein Child Health Study<sup>30</sup>, we  
5 found children born to mothers with prenatal maternal depression and trait anxiety had lower  
6 cognitive scores on the BSID-III ST compared to the no prenatal maternal depression or trait  
7 anxiety group. In contrast, we did not find an association between prenatal maternal depression  
8 alone on cognitive outcomes at 3-years of age. However, since we did not utilize the full BSID-  
9 III and only administered the BSID-III ST, it is difficult to directly compare our results to The  
10 Drakenstein Child Health study findings. Moreover, both studies relied on US normative data to  
11 define cutoff scores.  
12  
13  
14  
15  
16  
17  
18  
19  
20  
21  
22  
23

24 More recently, a large home-visiting intervention study based in Cape Town examined  
25 the effect of prenatal maternal depression only, postnatal maternal depression only (birth – 60  
26 months), or recurrent pre- and postnatal maternal depression. This study also accounted for  
27 several other risk factors including intimate partner violence, HIV status, and alcohol use on  
28 child social behaviors, language skills, and cognitive development. No associations were found  
29 between maternal depression at any time point with children's language or cognitive  
30 development at 36 or 60 months of age<sup>24</sup>. However, children of never depressed mothers had  
31 lower aggressive behaviors on the Child Behavior Checklist at 60 months of age than children of  
32 mothers with postnatal depression only or perinatal depression<sup>24</sup>.  
33  
34  
35  
36  
37  
38  
39  
40  
41  
42  
43

44 There are several biological mechanisms which can explain prior studies and our current  
45 findings linking prenatal maternal depression and anxiety with child social-emotional behaviors  
46 and cognitive development such as increased prenatal maternal inflammation, increased cortisol  
47 production, and/or epigenetic changes<sup>46-55</sup>. Pregnancy is associated with changes in inflammatory  
48 processes and increased placental cortisol production with reduced maternal HPA axis sensitivity  
49  
50  
51  
52  
53  
54  
55  
56  
57  
58  
59  
60

1  
2  
3 to stress<sup>46 47</sup>. However, prenatal maternal depression may upregulate inflammatory processes  
4 and/or cortisol production. Additionally, prior research found women with comorbid depression  
5 and anxiety have the greatest increases in salivary cortisol levels<sup>18</sup>. Maternal cortisol can cross  
6 the placenta resulting in increased inflammation<sup>46 47</sup> and/or affect the developmental of limbic  
7 regions, which are associated with social and emotional processes<sup>56</sup>. In animal models, increased  
8 proinflammatory proteins have been associated with widespread changes in perinatal brain  
9 development such as with volume reductions in gray and white matter, decreased density of  
10 GABAergic neurons, reduced synaptic pruning, and network dysfunction with potential  
11 downstream effects on neurobehavioral development<sup>48-55</sup>. Other studies examining the  
12 intergenerational transmission of trauma have demonstrated transgenerational epigenetic changes  
13 in animal models<sup>57</sup>. It is also possible comorbid maternal depression and trait anxiety may  
14 indicate a specific phenotype that is genetically transmitted to the next generation resulting in  
15 psychosocial sequelae in offspring. Taken together, prior research suggests multiple overlapping  
16 pathways by which prenatal maternal mood can affect offspring brain-behavioral development.

17  
18  
19 While we report an association of prenatal maternal depression and anxiety with child  
20 social-emotional and cognitive development from a prospective cohort study with a fairly large  
21 sample of participants, there are several methodological and contextual limitations within the  
22 current study that are worth noting. First, it is important to note that the reliance on maternal-  
23 report measures to characterize child social-emotional development is a limitation in the majority  
24 of research to date, including the present study. The reliance on maternal reporting of child  
25 social-emotional development may be influenced by factors such as maternal mood or education.  
26 An additional limitation was the use of the BSID-III screening test in the current study to  
27 measure cognitive development, which is based on US normative data. Future studies should

1  
2  
3 consider objective measures of child social-emotional development through observational or  
4 behavioral coding paradigms in addition to utilizing objective cognitive developmental  
5 assessments of with normative data in South African children.  
6  
7  
8  
9

10         There are also several unmeasured contextual factors which could affect our findings. For  
11 example, although prenatal maternal and child nutrition are known to affect child  
12 neurobehavioral development, we lacked measures of prenatal maternal nutrition, prenatal  
13 maternal micronutrient deficiencies, prenatal and postnatal household food insecurity, and  
14 information regarding child nutrition. Additionally, prior studies have emphasized the  
15 importance of measuring childhood trauma, maternal stress, and social support within  
16 communities with several heterogeneous risk factors<sup>3</sup>, these measures were not collected as part  
17 of the original NIH Safe Passage Study or our recent follow-up study. Therefore, we could not  
18 examine their effects or consider maternal social support as a potential moderator of resilient  
19 neurodevelopmental outcomes. There is also robust literature examining both postpartum  
20 depression (PPD) and the early mother-infant relation in shaping child outcomes. Two prior  
21 studies in South Africa demonstrated maternal intrusiveness and coerciveness mediated the  
22 association between maternal PPD and early childhood attachment<sup>58 59</sup>. In the current study, we  
23 did not collect data postnatally between birth and three years of age. Additionally, we did not  
24 collect postnatal information on maternal depression, anxiety, or stress. Therefore, due to this  
25 methodological limitation we cannot draw conclusions regarding the combined effect of the pre-  
26 and postnatal environment on child neurodevelopmental outcomes, nor can we assess potential  
27 interaction effects between pre- and postnatal maternal mood on child social-emotional and  
28 cognitive outcomes. Finally, our results may not generalize to all South African populations  
29 where HIV rates can be as high as 35% since our cohort only included one woman with HIV.  
30  
31  
32  
33  
34  
35  
36  
37  
38  
39  
40  
41  
42  
43  
44  
45  
46  
47  
48  
49  
50  
51  
52  
53  
54  
55  
56  
57  
58  
59  
60

1  
2  
3 Strengths of the current analyses include our large sample size, evaluation of both cognitive and  
4 social-emotional outcomes within the same cohort, finally the detailed prospective collection of  
5 both depression and anxiety symptoms during pregnancy<sup>31</sup> in addition to other potential  
6 confounders.  
7  
8  
9  
10

11  
12 Our results suggest comorbid prenatal maternal depression and chronic anxiety have a  
13 greater impact on child social-emotional and cognitive development than either condition alone  
14 or than comorbid prenatal maternal depression and transitory anxiety during pregnancy. These  
15 findings are supported by a robust literature within the DOHaD framework linking perturbations  
16 in the gestational environment to later neurodevelopmental or psychiatric sequelae. Our results  
17 also lend support for future intervention studies aimed at perinatal mental health interventions  
18 targeting maternal depressive and anxiety symptoms to improve long-term child social-emotional  
19 and cognitive developmental outcomes in low-resource communities.  
20  
21  
22  
23  
24  
25  
26  
27  
28  
29  
30  
31  
32  
33  
34  
35  
36  
37  
38  
39  
40  
41  
42  
43  
44  
45  
46  
47  
48  
49  
50  
51  
52  
53  
54  
55  
56  
57  
58  
59  
60

| <b>Table 1 - Sociodemographic characteristics</b> |                    |                           |
|---------------------------------------------------|--------------------|---------------------------|
|                                                   | Mean ± SD or N (%) | N and Percent Missing (%) |
| <b>Maternal Characteristics</b>                   |                    |                           |
| Maternal Age (years)                              | 25.26 ± 5.91       | 0 (0%)                    |
| Maternal Body Mass Index (BMI)                    |                    | 0 (0%)                    |
| BMI <18.5 (kg/m <sup>2</sup> )                    | 62 (10.33%)        |                           |
| BMI 18.5-25 (kg/m <sup>2</sup> )                  | 282 (47%)          |                           |
| BMI 25-30 (kg/m <sup>2</sup> )                    | 132 (22%)          |                           |
| BMI >30 (kg/m <sup>2</sup> )                      | 124 (20.67%)       |                           |
| Parity                                            |                    | 0 (0%)                    |
| Parity <1                                         | 218 (36.33%)       |                           |
| Parity =1                                         | 196 (32.67%)       |                           |
| Parity =2                                         | 103 (17.17%)       |                           |
| Parity ≥3                                         | 83 (13.83%)        |                           |
| Antenatal care visits                             |                    | 0 (0%)                    |
| antenatal care visit <3                           | 49 (8.17%)         |                           |
| antenatal care visit 3-6                          | 389 (64.83%)       |                           |
| antenatal care visit >6                           | 162 (27%)          |                           |
| Cesarean Section                                  | 106 (17.70%)       | 1 (0.1%)                  |
| Education                                         |                    | 0 (0%)                    |
| Some primary school                               | 43 (7.167%)        |                           |
| Some high school                                  | 405 (67.57%)       |                           |
| Completed high school                             | 119 (19.83%)       |                           |
| Beyond high school                                | 33 (5.5%)          |                           |
| Married                                           | 290 (48.33%)       | 0 (0%)                    |
| Employed                                          | 172 (28.67%)       | 0 (0%)                    |
| Adjusted Household Crowding                       | 1.56 ± 0.72        | 2 (0.33%)                 |
| Depression (Edinburgh ≥13)                        | 333 (55%)          | 0 (0%)                    |
| Anxiety (State-Trait Anxiety Inventory ≥40)       | 115 (19.17%)       | 0 (0%)                    |
| Maternal Prenatal Alcohol Use Cluster Groups      |                    | 0 (0%)                    |
| Non drinking group: 0 standard drinks/trimester   | 245 (46.93%)       |                           |
| Moderate-high continuous drinking group:          | 122 (23.37%)       |                           |
| Standard drinks in Trimester 1                    | 27 ± 39            |                           |
| Standard drinks in Trimester 2                    | 17 ± 25            |                           |

|  |                                                    |               |           |
|--|----------------------------------------------------|---------------|-----------|
|  | Standard drinks in Trimester 3                     | 9.4 ± 15      |           |
|  | Binge drinking events (≥ 4 drinks/day) Trimester 1 | 2.7 ± 4       |           |
|  | Binge drinking events (≥ 4 drinks/day) Trimester 2 | 1.7 ± 2.8     |           |
|  | Binge drinking events (≥ 4 drinks/day) Trimester 3 | 0.89 ± 1.7    |           |
|  | Low continuous drinking                            | 26 (4.98%)    |           |
|  | Standard drinks in Trimester 1                     | 1.4 ± 2.5     |           |
|  | Standard drinks in Trimester 2                     | 4 ± 2.8       |           |
|  | Standard drinks in Trimester 3                     | 0.62 ± 1.1    |           |
|  | Binge drinking events (≥ 4 drinks/day) Trimester 1 | 0.067 ± 0.25  |           |
|  | Binge drinking events (≥ 4 drinks/day) Trimester 2 | 0.30 ± 0.46   |           |
|  | Binge drinking events (≥ 4 drinks/day) Trimester 3 | 0 ± 0         |           |
|  | Quit early drinking                                | 129 (24.71%)  |           |
|  | Standard drinks in Trimester 1                     | 8.5 ± 6.5     |           |
|  | Standard drinks in Trimester 2                     | 0.31 ± 0.87   |           |
|  | Standard drinks in Trimester 3                     | 0.056 ± 0.31  |           |
|  | Binge drinking events (≥ 4 drinks/day) Trimester 1 | 0.84 ± 0.82   |           |
|  | Binge drinking events (≥ 4 drinks/day) Trimester 2 | 0 ± 0         |           |
|  | Binge drinking events (≥ 4 drinks/day) Trimester 3 | 0 ± 0         |           |
|  | Maternal Prenatal Tobacco Use                      |               | 2 (0.33%) |
|  | Non smoking (0 cigarettes/trimester)               | 227 (37.97%)  |           |
|  | Moderate-high continuous smoking                   | 132 (22.07%)  |           |
|  | Average Cigarettes in Trimester 1                  | 45 ± 20       |           |
|  | Average Cigarettes in Trimester 2                  | 50 ± 27       |           |
|  | Average Cigarettes in Trimester 3                  | 48 ± 25       |           |
|  | Low continuous smoking                             | 222 (37.12%)  |           |
|  | Average Cigarettes in Trimester 1                  | 16 ± 9.4      |           |
|  | Average Cigarettes in Trimester 2                  | 16 ± 9.7      |           |
|  | Average Cigarettes in Trimester 3                  | 16 ± 10       |           |
|  | Quit early smoking                                 | 17 (2.84%)    |           |
|  | Average Cigarettes in Trimester 1                  | 11 ± 7.5      |           |
|  | Average Cigarettes in Trimester 2                  | 0.15 ± 0.32   |           |
|  | Average Cigarettes in Trimester 3                  | 0.079 ± 0.11  |           |
|  | Raw Maternal Edinburgh Score                       | 12.99 ± 5.73  | 0 (0%)    |
|  | Raw Maternal State Anxiety Score                   | 31.23 ± 10.24 | 0 (0%)    |
|  | Raw Maternal Trait Anxiety Score                   | 40.63 ± 10.63 | 0 (0%)    |
|  | Depression - Trait Anxiety Groups                  |               | 0 (0%)    |
|  | No depression or trait anxiety                     | 199 (33.17%)  |           |
|  | Depression alone                                   | 106 (17.67%)  |           |
|  | Trait anxiety alone                                | 68 (11.33%)   |           |
|  | Depression and trait anxiety                       | 227 (37.83%)  |           |

|                                   |                                |                  |           |
|-----------------------------------|--------------------------------|------------------|-----------|
| Depression - State Anxiety Groups |                                |                  | 0 (0%)    |
|                                   | No depression or state anxiety | 248 (41.33%)     |           |
|                                   | Depression alone               | 237 (39.50%)     |           |
|                                   | State anxiety alone            | 19 (3.17%)       |           |
|                                   | Depression and state anxiety   | 96 (16%)         |           |
| HIV status                        |                                |                  |           |
|                                   | Tested for HIV                 | 600 (100%)       |           |
|                                   | HIV positive                   | 1 (0.1%)         |           |
| <b>Infant Characteristics</b>     |                                |                  |           |
| Infant Sex                        |                                |                  | 0 (0%)    |
|                                   | Male                           | 326 (54.33%)     |           |
|                                   | Female                         | 274 (45.67%)     |           |
| Gestational age at birth (weeks)  |                                | 38.89 ± 2.03     | 0 (0%)    |
| Infant Birth weight (grams)       |                                | 2980.65 ± 564.65 | 2 (0.33%) |
| Follow-up age (months)            |                                | 38.29 ± 2.96     | 0 (0%)    |
| Adjusted follow-up age (months)   |                                | 38.14 ± 0.016    | 0 (0%)    |

**Table 2. Neurodevelopmental Outcome Raw Scores and At-risk Groups**

|                                                           |                             |              |  |
|-----------------------------------------------------------|-----------------------------|--------------|--|
| BSID-III Screening Test Language of Administration        |                             |              |  |
|                                                           | English Only                | 177 (30%)    |  |
|                                                           | Afrikaans Only              | 360 (62%)    |  |
|                                                           | Mixed English and Afrikaans | 48 (8%)      |  |
| BSID-III Screening Test Scores                            |                             |              |  |
|                                                           | Gross motor                 | 25.47 ± 4.54 |  |
|                                                           | Fine motor                  | 23.55 ± 4.08 |  |
|                                                           | Cognitive                   | 27.77 ± 4.99 |  |
|                                                           | Problem solving             | 13.40 ± 6.77 |  |
|                                                           | Receptive language          | 21.69 ± 5.10 |  |
|                                                           | Expressive language         | 21.27 ± 3.78 |  |
| At-Risk Categories                                        |                             |              |  |
|                                                           | Gross motor                 | 21 (4%)      |  |
|                                                           | Fine motor                  | 18 (3%)      |  |
|                                                           | Cognitive                   | 24 (4%)      |  |
|                                                           | Receptive language          | 33 (6%)      |  |
|                                                           | Expressive language         | 25 (4%)      |  |
| Brief Infant Toddler Social-Emotional Assessment (BITSEA) |                             |              |  |
|                                                           | Social Emotional Problem    | 13.40 ± 6.77 |  |
|                                                           | Competence                  | 19.56 ± 2.07 |  |

| At-Risk Categories          |           |
|-----------------------------|-----------|
| Social Emotional Problems   | 306 (51%) |
| Social-Emotional Competence | 30 (5%)   |

## Figure Legends

**Figure 1.** Association between prenatal maternal depression, prenatal maternal anxiety, and child social-emotional problems measured by the BITSEA. Each line plot depicts the mean difference and their confidence interval for child social-emotional problems (x-axis) for each prenatal maternal mental health group (y-axis). Either no prenatal maternal depression and state anxiety or no prenatal maternal depression and trait anxiety were the reference groups. Models were adjusted for sex, gestational age at birth, age at follow-up, prenatal maternal alcohol use, prenatal maternal tobacco use, maternal employment status at delivery, maternal educational attainment at delivery, parity, and the household crowding index.

**Figure 2.** Association between prenatal maternal depression, prenatal maternal anxiety, and child cognitive development measured by the BSID-III Screening Test. Each line plot depicts the mean difference and their confidence interval for child cognitive development (x-axis) for each prenatal maternal mental health group (y-axis). Either no prenatal maternal depression and state anxiety or no prenatal maternal depression and trait anxiety were the reference groups. Models were adjusted for sex, gestational age at birth, age at follow-up, prenatal maternal alcohol use, prenatal maternal tobacco use, maternal employment status at delivery, maternal educational attainment at delivery, parity, and the household crowding index.

## References

- O'Donnell KJ, Meaney MJ. Fetal Origins of Mental Health: The Developmental Origins of Health and Disease Hypothesis. *Am J Psychiatry* 2017;174(4):319-28. doi: 10.1176/appi.ajp.2016.16020138 [published Online First: 2016/11/15]
- Hofer MA. *The Roots of Human Behavior: An Introduction to the Psychobiology of Early Development*. San Francisco, CA: W. H. Freeman & Company 1981.
- Stein DJ, Koen N, Donald KA, et al. Investigating the psychosocial determinants of child health in Africa: The Drakenstein Child Health Study. *J Neurosci Methods* 2015;252:27-35. doi: 10.1016/j.jneumeth.2015.03.016 [published Online First: 2015/03/24]
- Herba CM, Glover V, Ramchandani PG, et al. Maternal depression and mental health in early childhood: an examination of underlying mechanisms in low-income and middle-income countries. *Lancet Psychiatry* 2016;3(10):983-92. doi: 10.1016/S2215-0366(16)30148-1 [published Online First: 2016/09/22]



- 1  
2  
3 5. Monk C, Lugo-Candelas C, Trumpff C. Prenatal Developmental Origins of Future  
4 Psychopathology: Mechanisms and Pathways. *Annu Rev Clin Psychol* 2019;15:317-44.  
5 doi: 10.1146/annurev-clinpsy-050718-095539 [published Online First: 2019/02/24]
- 6 6. Madigan S, Oatley H, Racine N, et al. A Meta-Analysis of Maternal Prenatal Depression and  
7 Anxiety on Child Socioemotional Development. *J Am Acad Child Adolesc Psychiatry*  
8 2018;57(9):645-57 e8. doi: 10.1016/j.jaac.2018.06.012
- 9 7. King S, Laplante DP. The effects of prenatal maternal stress on children's cognitive  
10 development: Project Ice Storm. *Stress* 2005;8(1):35-45. doi:  
11 10.1080/10253890500108391
- 12 8. Huizink AC, Robles de Medina PG, Mulder EJ, et al. Stress during pregnancy is associated  
13 with developmental outcome in infancy. *J Child Psychol Psychiatry* 2003;44(6):810-8.  
14 doi: 10.1111/1469-7610.00166 [published Online First: 2003/09/10]
- 15 9. Leis JA, Heron J, Stuart EA, et al. Associations between maternal mental health and child  
16 emotional and behavioral problems: does prenatal mental health matter? *J Abnorm Child*  
17 *Psychol* 2014;42(1):161-71. doi: 10.1007/s10802-013-9766-4
- 18 10. O'Connor TG, Heron J, Golding J, et al. Maternal antenatal anxiety and children's  
19 behavioural/emotional problems at 4 years. Report from the Avon Longitudinal Study of  
20 Parents and Children. *Br J Psychiatry* 2002;180:502-8.
- 21 11. O'Donnell KJ, Glover V, Barker ED, et al. The persisting effect of maternal mood in  
22 pregnancy on childhood psychopathology. *Dev Psychopathol* 2014;26(2):393-403. doi:  
23 10.1017/S0954579414000029
- 24 12. Loomans EM, van der Stelt O, van Eijsden M, et al. Antenatal maternal anxiety is associated  
25 with problem behaviour at age five. *Early Hum Dev* 2011;87(8):565-70. doi:  
26 10.1016/j.earlhumdev.2011.04.014
- 27 13. Rice F, Harold GT, Boivin J, et al. The links between prenatal stress and offspring  
28 development and psychopathology: disentangling environmental and inherited influences.  
29 *Psychol Med* 2010;40(2):335-45. doi: 10.1017/S0033291709005911
- 30 14. Ronald A, Pennell CE, Whitehouse AJ. Prenatal Maternal Stress Associated with ADHD and  
31 Autistic Traits in early Childhood. *Front Psychol* 2010;1:223. doi:  
32 10.3389/fpsyg.2010.00223 [published Online First: 2010/01/01]
- 33 15. Lereya ST, Wolke D. Prenatal family adversity and maternal mental health and vulnerability  
34 to peer victimisation at school. *J Child Psychol Psychiatry* 2013;54(6):644-52. doi:  
35 10.1111/jcpp.12012
- 36 16. Rogers A, Obst S, Teague SJ, et al. Association Between Maternal Perinatal Depression and  
37 Anxiety and Child and Adolescent Development: A Meta-analysis. *JAMA Pediatr*  
38 2020;174(11):1082-92. doi: 10.1001/jamapediatrics.2020.2910 [published Online First:  
39 2020/09/15]
- 40 17. Van den Bergh BRH, van den Heuvel MI, Lahti M, et al. Prenatal developmental origins of  
41 behavior and mental health: The influence of maternal stress in pregnancy. *Neurosci*  
42 *Biobehav Rev* 2017 doi: 10.1016/j.neubiorev.2017.07.003 [published Online First:  
43 2017/08/02]
- 44 18. Evans LM, Myers MM, Monk C. Pregnant women's cortisol is elevated with anxiety and  
45 depression - but only when comorbid. *Arch Womens Ment Health* 2008;11(3):239-48.  
46 doi: 10.1007/s00737-008-0019-4 [published Online First: 2008/05/22]
- 47  
48  
49  
50  
51  
52  
53  
54  
55  
56  
57  
58  
59  
60

19. Leff Gelman P, Mancilla-Herrera I, Flores-Ramos M, et al. The cytokine profile of women with severe anxiety and depression during pregnancy. *BMC Psychiatry* 2019;19(1):104. doi: 10.1186/s12888-019-2087-6 [published Online First: 2019/04/05]
20. Osborne LM, Yenokyan G, Fei K, et al. Innate immune activation and depressive and anxious symptoms across the peripartum: An exploratory study. *Psychoneuroendocrinology* 2019;99:80-86. doi: 10.1016/j.psyneuen.2018.08.038 [published Online First: 2018/09/09]
21. Osborne LM, Brar A, Klein SL. The role of Th17 cells in the pathophysiology of pregnancy and perinatal mood and anxiety disorders. *Brain Behav Immun* 2019;76:7-16. doi: 10.1016/j.bbi.2018.11.015 [published Online First: 2018/11/23]
22. Eshetu EB, Woldesenbet SA. Are there particular social determinants of health for the world's poorest countries? *African Health Sciences* 2011;11(1):108 - 15.
23. Davies T, Rahman A, Lund C. Psychotherapy for perinatal mental disorders in low- and middle-income countries. In *Global Mental Health in Practice, Global Mental Health and Psychotherapy*: Academic Press, 2019:301 - 19.
24. Gordon S, Rotheram-Fuller E, Rezvan P, et al. Maternal depressed mood and child development over the first five years of life in South Africa. *J Affect Disord* 2021;294:346-56. doi: 10.1016/j.jad.2021.07.027 [published Online First: 2021/07/28]
25. Heyning TV, Myer L, Onah M, et al. Antenatal depression and adversity in urban South Africa. *J Affect Disord* 2016;203:121-29. doi: 10.1016/j.jad.2016.05.052 [published Online First: 2016/06/11]
26. Redinger S, Norris SA, Pearson RM, et al. First trimester antenatal depression and anxiety: prevalence and associated factors in an urban population in Soweto, South Africa. *J Dev Orig Health Dis* 2018;9(1):30-40. doi: 10.1017/S204017441700071X [published Online First: 2017/09/08]
27. Redinger S, Pearson RM, Houle B, et al. Antenatal depression and anxiety across pregnancy in urban South Africa. *J Affect Disord* 2020;277:296-305. doi: 10.1016/j.jad.2020.08.010 [published Online First: 2020/08/29]
28. Drysdale RE, Slemming W, Makusha T, et al. Father involvement, maternal depression and child nutritional outcomes in Soweto, South Africa. *Matern Child Nutr* 2021;17 Suppl 1:e13177. doi: 10.1111/mcn.13177 [published Online First: 2021/07/10]
29. Ramchandani PG, Richter LM, Norris SA, et al. Maternal prenatal stress and later child behavioral problems in an urban South African setting. *J Am Acad Child Adolesc Psychiatry* 2010;49(3):239-47. [published Online First: 2010/04/23]
30. Donald KA, Wedderburn CJ, Barnett W, et al. Risk and protective factors for child development: An observational South African birth cohort. *PLoS Med* 2019;16(9):e1002920. doi: 10.1371/journal.pmed.1002920 [published Online First: 2019/09/29]
31. Dukes KA, Burd L, Elliott AJ, et al. The Safe Passage Study: Design, Methods, Recruitment, and Follow-Up Approach. *Paediatr Perinat Ep* 2014;28(5):455-65. doi: 10.1111/ppe.12136
32. Dukes K, Tripp T, Petersen J, et al. A modified Timeline Followback assessment to capture alcohol exposure in pregnant women: Application in the Safe Passage Study. *Alcohol* 2017;62:17-27. doi: 10.1016/j.alcohol.2017.02.174

- 1  
2  
3 33. Pini N, Shuffrey, LC., Lucchini, M., Sania, A., Nelson, ME., Odendaal, HJ., Fifer, WP.,  
4 Myers, MM., Elliott, AJ. Characterization of Alcohol Consumption during Pregnancy in  
5 the Safe Passage Study. Conf Proc IEEE Eng Med Biol Soc. Berlin, Germany.  
6  
7 34. Shuffrey LC, Myers MM, Isler JR, et al. Association Between Prenatal Exposure to Alcohol  
8 and Tobacco and Neonatal Brain Activity: Results From the Safe Passage Study. *JAMA*  
9 *Netw Open* 2020;3(5):e204714. doi: 10.1001/jamanetworkopen.2020.4714 [published  
10 Online First: 2020/05/13]  
11  
12 35. Lawrie TA, Hofmeyr GJ, de Jager M, et al. Validation of the Edinburgh Postnatal Depression  
13 Scale on a cohort of South African women. *S Afr Med J* 1998;88(10):1340-4. [published  
14 Online First: 1998/11/10]  
15  
16 36. Alvarado R, Jadresic E, Guajardo V, et al. First validation of a Spanish-translated version of  
17 the Edinburgh postnatal depression scale (EPDS) for use in pregnant women. A Chilean  
18 study. *Arch Womens Ment Health* 2015;18(4):607-12. doi: 10.1007/s00737-014-0466-z  
19 [published Online First: 2014/10/11]  
20  
21 37. Hartley M, Tomlinson M, Greco E, et al. Depressed mood in pregnancy: prevalence and  
22 correlates in two Cape Town peri-urban settlements. *Reprod Health* 2011;8:9. doi:  
23 10.1186/1742-4755-8-9 [published Online First: 2011/05/04]  
24  
25 38. Spielberger CD. Manual for the State-Trait Anxiety Inventory: STAI. Palo Alto, CA:  
26 Consulting Psychologists Press, 1983.  
27  
28 39. Pretorius TB, Norman AM. Psychometric Data on the Statistics Anxiety Scale for a Sample  
29 of South-African Students. *Educational and Psychological Measurement*  
30 1992;52(4):933-37. doi: Doi 10.1177/0013164492052004015  
31  
32 40. Rademeyer V, Jacklin L. A study to evaluate the performance of black South African urban  
33 infants on the Bayley Scales of Infant Development III. *South African Journal of Child*  
34 *Health* 2013;7(2):54-59.  
35  
36 41. Ballot DE, Ramdin T, Rakotsoane D, et al. Use of the Bayley Scales of Infant and Toddler  
37 Development, Third Edition, to Assess Developmental Outcome in Infants and Young  
38 Children in an Urban Setting in South Africa. *Int Sch Res Notices* 2017;2017:1631760.  
39 doi: 10.1155/2017/1631760 [published Online First: 2017/08/25]  
40  
41 42. Gowan B, Carter MJ, Carter AS. ITSEA/BITSEA: Infant-Toddler and Brief Infant-Toddler  
42 Social and Emotional Assessment. *The Psychological Corporation* 2006  
43  
44 43. Kruizinga I, Visser JC, van Batenburg-Eddes T, et al. Screening for autism spectrum  
45 disorders with the brief infant-toddler social and emotional assessment. *PLoS One*  
46 2014;9(5):e97630. doi: 10.1371/journal.pone.0097630 [published Online First:  
47 2014/05/24]  
48  
49 44. Sang S, Nelson, JA. The effect of siblings on children's social skills and perspective taking.  
50 *Inf Child Dev* 2017;26:e2023.  
51  
52 45. Downey DB CD, Yucel D. Number of Siblings and Social Skills Revisited Among American  
53 Fifth Graders. *Journal of Family Issues* 2015;36(2):273-96. doi:  
54 10.1177/0192513X13507569  
55  
56 46. Ghassabian A, Albert PS, Hornig M, et al. Gestational cytokine concentrations and  
57 neurocognitive development at 7 years. *Transl Psychiat* 2018;8 doi: ARTN 64  
58 10.1038/s41398-018-0112-z  
59  
60 47. Ruiz RJ, Avant KC. Effects of maternal prenatal stress on infant outcomes - A synthesis of  
the literature. *Adv Nurs Sci* 2005;28(4):345-55. doi: Doi 10.1097/00012272-200510000-  
00006

- 1  
2  
3 48. Short SJ, Lubach GR, Karasin AI, et al. Maternal influenza infection during pregnancy  
4 impacts postnatal brain development in the rhesus monkey. *Biol Psychiatry*  
5 2010;67(10):965-73. doi: 10.1016/j.biopsych.2009.11.026 [published Online First:  
6 2010/01/19]  
7  
8 49. Paolicelli RC, Bolasco G, Pagani F, et al. Synaptic pruning by microglia is necessary for  
9 normal brain development. *Science* 2011;333(6048):1456-8. doi:  
10 10.1126/science.1202529 [published Online First: 2011/07/23]  
11  
12 50. Bergdolt L, Dunaevsky A. Brain changes in a maternal immune activation model of  
13 neurodevelopmental brain disorders. *Prog Neurobiol* 2019;175:1-19. doi:  
14 10.1016/j.pneurobio.2018.12.002 [published Online First: 2018/12/28]  
15  
16 51. Meyer U. Neurodevelopmental Resilience and Susceptibility to Maternal Immune  
17 Activation. *Trends Neurosci* 2019;42(11):793-806. doi: 10.1016/j.tins.2019.08.001  
18 [published Online First: 2019/09/09]  
19  
20 52. Patterson PH. Maternal infection: window on neuroimmune interactions in fetal brain  
21 development and mental illness. *Curr Opin Neurobiol* 2002;12(1):115-8. doi:  
22 10.1016/s0959-4388(02)00299-4 [published Online First: 2002/02/28]  
23  
24 53. Bland ST, Beckley JT, Young S, et al. Enduring consequences of early-life infection on glial  
25 and neural cell genesis within cognitive regions of the brain. *Brain Behav Immun*  
26 2010;24(3):329-38. doi: 10.1016/j.bbi.2009.09.012 [published Online First: 2009/09/29]  
27  
28 54. Money KM, Barke TL, Serezani A, et al. Gestational diabetes exacerbates maternal immune  
29 activation effects in the developing brain. *Mol Psychiatry* 2018;23(9):1920-28. doi:  
30 10.1038/mp.2017.191 [published Online First: 2017/09/28]  
31  
32 55. Bilbo SD, Schwarz JM. Early-life programming of later-life brain and behavior: a critical  
33 role for the immune system. *Front Behav Neurosci* 2009;3:14. doi:  
34 10.3389/neuro.08.014.2009 [published Online First: 2009/09/10]  
35  
36 56. Buss C, Davis EP, Shahbaba B, et al. Maternal cortisol over the course of pregnancy and  
37 subsequent child amygdala and hippocampus volumes and affective problems. *P Natl*  
38 *Acad Sci USA* 2012;109(20):E1312-E19. doi: 10.1073/pnas.1201295109  
39  
40 57. Yehuda R, Lehrner A. Intergenerational transmission of trauma effects: putative role of  
41 epigenetic mechanisms. *World Psychiatry* 2018;17(3):243-57. doi: 10.1002/wps.20568  
42 [published Online First: 2018/09/08]  
43  
44 58. Cooper PJ, Tomlinson M, Swartz L, et al. Post-partum depression and the mother-infant  
45 relationship in a South African peri-urban settlement. *Br J Psychiatry* 1999;175:554-8.  
46 doi: 10.1192/bjp.175.6.554 [published Online First: 2000/05/02]  
47  
48 59. Tomlinson M, Cooper P, Murray L. The mother-infant relationship and infant attachment in a  
49 South African peri-urban settlement. *Child Dev* 2005;76(5):1044-54. doi: 10.1111/j.1467-  
50 8624.2005.00896.x [published Online First: 2005/09/10]  
51  
52  
53  
54  
55  
56  
57  
58  
59  
60

1  
2  
3 **Contributors:** WPF and HJO acquired funding for and designed the work. LCS, AS, NHB, ML,  
4 YR, PES, HJO, and WPF conceptualized the work. MP, PES, CDP, and HJO acquired the data.  
5  
6 LCS, NHB, and WPF led in data collection oversight and quality control. AS, LCS, and YR  
7  
8 analyzed the data. All authors contributed to the interpretation of data and drafting the work and  
9  
10 revising it critically for important intellectual content. All authors approved the final manuscript  
11  
12 and agree to be accountable for all aspects of the work.  
13  
14  
15  
16  
17  
18

19 **Acknowledgements:** We would like to acknowledge Lucy Brink, J. David Nugent, and Daianna  
20  
21 Rodriguez for their database and administrative support. We would also like to thank all of the  
22  
23 families who participated in this research study for making this work possible.  
24  
25  
26  
27

## 28 **Ethics statements**

### 29 **Patient consent for publication**

30  
31 Not applicable.  
32  
33  
34  
35  
36  
37

### 38 **Ethics approval**

39  
40 Ethics approval was received from the Institutional Review Boards and ethics review committees  
41  
42 at Stellenbosch University (N16-08-101 and N06-10-210) and the New York State Psychiatric  
43  
44 Institute (5338). All participants provided informed written consent at both time points (prenatal  
45  
46 and postnatal) before inclusion in the study.  
47  
48  
49  
50  
51  
52  
53  
54  
55  
56  
57  
58  
59  
60



30  
31  
32  
33  
34  
35  
36  
37  
38  
39  
40  
41  
42  
43  
44  
45  
46  
47  
48  
49  
50  
51  
52  
53  
54  
55  
56  
57  
58  
59  
60

Figure 1. Association between prenatal maternal depression, prenatal maternal anxiety, and child social-emotional problems measured by the BITSEA. Each line plot depicts the mean difference and their confidence interval for child social-emotional problems (x-axis) for each prenatal maternal mental health group (y-axis). Either no prenatal maternal depression and state anxiety or no prenatal maternal depression and trait anxiety were the reference groups. Models were adjusted for sex, gestational age at birth, age at follow-up, prenatal maternal alcohol use, prenatal maternal tobacco use, maternal employment status at delivery, maternal educational attainment at delivery, parity, and the household crowding index.

247x181mm (72 x 72 DPI)



Figure 2. . Association between prenatal maternal depression, prenatal maternal anxiety, and child cognitive development measured by the BSID-III Screening Test. Each line plot depicts the mean difference and their confidence interval for child cognitive development (x-axis) for each prenatal maternal mental health group (y-axis). Either no prenatal maternal depression and state anxiety or no prenatal maternal depression and trait anxiety were the reference groups. Models were adjusted for sex, gestational age at birth, age at follow-up, prenatal maternal alcohol use, prenatal maternal tobacco use, maternal employment status at delivery, maternal educational attainment at delivery, parity, and the household crowding index.

247x181mm (72 x 72 DPI)

STROBE Statement—Checklist of items that should be included in reports of *cohort studies*

|                           | Item No | Recommendation                                                                                                                                                                                                                                                                                                         | Page No                             |
|---------------------------|---------|------------------------------------------------------------------------------------------------------------------------------------------------------------------------------------------------------------------------------------------------------------------------------------------------------------------------|-------------------------------------|
| <b>Title and abstract</b> | 1       | (a) Indicate the study's design with a commonly used term in the title or the abstract<br>(b) Provide in the abstract an informative and balanced summary of what was done and what was found                                                                                                                          | 2<br>3, 4                           |
| <b>Introduction</b>       |         |                                                                                                                                                                                                                                                                                                                        |                                     |
| Background/rationale      | 2       | Explain the scientific background and rationale for the investigation being reported                                                                                                                                                                                                                                   | 5, 6                                |
| Objectives                | 3       | State specific objectives, including any prespecified hypotheses                                                                                                                                                                                                                                                       | 6                                   |
| <b>Methods</b>            |         |                                                                                                                                                                                                                                                                                                                        |                                     |
| Study design              | 4       | Present key elements of study design early in the paper                                                                                                                                                                                                                                                                | 7 - 9                               |
| Setting                   | 5       | Describe the setting, locations, and relevant dates, including periods of recruitment, exposure, follow-up, and data collection                                                                                                                                                                                        | 7 - 9                               |
| Participants              | 6       | (a) Give the eligibility criteria, and the sources and methods of selection of participants. Describe methods of follow-up<br>(b) For matched studies, give matching criteria and number of exposed and unexposed                                                                                                      | 7 - 9<br>N/A                        |
| Variables                 | 7       | Clearly define all outcomes, exposures, predictors, potential confounders, and effect modifiers. Give diagnostic criteria, if applicable                                                                                                                                                                               | 9 - 10                              |
| Data sources/measurement  | 8*      | For each variable of interest, give sources of data and details of methods of assessment (measurement). Describe comparability of assessment methods if there is more than one group                                                                                                                                   | 7 - 10                              |
| Bias                      | 9       | Describe any efforts to address potential sources of bias                                                                                                                                                                                                                                                              | 10                                  |
| Study size                | 10      | Explain how the study size was arrived at                                                                                                                                                                                                                                                                              | 11                                  |
| Quantitative variables    | 11      | Explain how quantitative variables were handled in the analyses. If applicable, describe which groupings were chosen and why                                                                                                                                                                                           | 9 - 10                              |
| Statistical methods       | 12      | (a) Describe all statistical methods, including those used to control for confounding<br>(b) Describe any methods used to examine subgroups and interactions<br>(c) Explain how missing data were addressed<br>(d) If applicable, explain how loss to follow-up was addressed<br>(e) Describe any sensitivity analyses | 9 - 10<br>9 - 10<br>10<br>10<br>N/A |
| <b>Results</b>            |         |                                                                                                                                                                                                                                                                                                                        |                                     |
| Participants              | 13*     | (a) Report numbers of individuals at each stage of study—eg numbers potentially eligible, examined for eligibility, confirmed eligible, included in the study, completing follow-up, and analysed<br>(b) Give reasons for non-participation at each stage<br>(c) Consider use of a flow diagram                        | 11<br>11                            |
| Descriptive data          | 14*     | (a) Give characteristics of study participants (eg demographic, clinical, social) and information on exposures and potential confounders<br>(b) Indicate number of participants with missing data for each variable of interest<br>(c) Summarise follow-up time (eg, average and total amount)                         | 9, 11 - 13<br>10                    |
| Outcome data              | 15*     | Report numbers of outcome events or summary measures over time                                                                                                                                                                                                                                                         | 11                                  |



|    |                          |    |                                                                                                                                                                                                              |         |
|----|--------------------------|----|--------------------------------------------------------------------------------------------------------------------------------------------------------------------------------------------------------------|---------|
| 1  | Main results             | 16 | (a) Give unadjusted estimates and, if applicable, confounder-adjusted estimates and their precision (eg, 95% confidence interval). Make clear which confounders were adjusted for and why they were included | 11 - 13 |
| 2  |                          |    | (b) Report category boundaries when continuous variables were categorized                                                                                                                                    | N/A     |
| 3  |                          |    | (c) If relevant, consider translating estimates of relative risk into absolute risk for a meaningful time period                                                                                             |         |
| 4  |                          |    |                                                                                                                                                                                                              |         |
| 5  |                          |    |                                                                                                                                                                                                              |         |
| 6  |                          |    |                                                                                                                                                                                                              |         |
| 7  |                          |    |                                                                                                                                                                                                              |         |
| 8  |                          |    |                                                                                                                                                                                                              |         |
| 9  | Other analyses           | 17 | Report other analyses done—eg analyses of subgroups and interactions, and sensitivity analyses                                                                                                               | 11 - 13 |
| 10 |                          |    |                                                                                                                                                                                                              |         |
| 11 | <b>Discussion</b>        |    |                                                                                                                                                                                                              |         |
| 12 |                          |    |                                                                                                                                                                                                              |         |
| 13 | Key results              | 18 | Summarise key results with reference to study objectives                                                                                                                                                     | 14      |
| 14 | Limitations              | 19 | Discuss limitations of the study, taking into account sources of potential bias or imprecision. Discuss both direction and magnitude of any potential bias                                                   | 17      |
| 15 |                          |    |                                                                                                                                                                                                              |         |
| 16 | Interpretation           | 20 | Give a cautious overall interpretation of results considering objectives, limitations, multiplicity of analyses, results from similar studies, and other relevant evidence                                   | 17      |
| 17 |                          |    |                                                                                                                                                                                                              |         |
| 18 |                          |    |                                                                                                                                                                                                              |         |
| 19 | Generalisability         | 21 | Discuss the generalisability (external validity) of the study results                                                                                                                                        | 17      |
| 20 |                          |    |                                                                                                                                                                                                              |         |
| 21 | <b>Other information</b> |    |                                                                                                                                                                                                              |         |
| 22 | Funding                  | 22 | Give the source of funding and the role of the funders for the present study and, if applicable, for the original study on which the present article is based                                                | 1       |
| 23 |                          |    |                                                                                                                                                                                                              |         |
| 24 |                          |    |                                                                                                                                                                                                              |         |

\*Give information separately for exposed and unexposed groups.

**Note:** An Explanation and Elaboration article discusses each checklist item and gives methodological background and published examples of transparent reporting. The STROBE checklist is best used in conjunction with this article (freely available on the Web sites of PLoS Medicine at <http://www.plosmedicine.org/>, Annals of Internal Medicine at <http://www.annals.org/>, and Epidemiology at <http://www.epidem.com/>). Information on the STROBE Initiative is available at <http://www.strobe-statement.org>.
